1 **Nuclear envelope budding is a response to cellular stress**

2

3

Dimitra Panagaki<sup>a1</sup> and Jacob T. Croft<sup>a1</sup>, Katharina Keuenhof<sup>a</sup>, Lisa Larsson-Berglund<sup>a</sup>, Stefanie  
4 Andersson<sup>a</sup>, Verena Kohler<sup>c</sup>, Sabrina Büttner<sup>c</sup>, Markus J. Tamás<sup>a</sup>, Thomas Nyström<sup>b</sup>, Richard  
5 Neutze<sup>a</sup>, Johanna L. Höög<sup>a\*</sup>

6

<sup>a</sup>Department of Chemistry and Molecular Biology, University of Gothenburg, 405 30, Gothenburg, Sweden

7

<sup>b</sup>Department of Microbiology and Immunology, University of Gothenburg, 405 30, Gothenburg, Sweden

8

<sup>c</sup>Department of Molecular Biosciences, The Wenner-Gren Institute, Stockholm University, 106 91,

9

Stockholm, Sweden

10

\* Johanna L. Höög

11

**Email:** johanna.hoog@gu.se

12

13

**Classification**

14

Biological Sciences; Cell Biology

15

16

17

18

19

---

<sup>1</sup> These authors contributed equally to the manuscript.

20 **Keywords**

21 Nuclear transport; budding; vesicles; electron tomography; protein quality control;

22 **Author Contributions**

23 Conceptualization, D.P., J.T.C., S.B. and J.L.H.; Methodology, D.P., J.T.C., L.L.B., K.K. and  
24 J.L.H.; Validation, D.P., J.T.C. and K.K.; Formal Analysis, D.P., J.T.C., R.N. and K.K.;  
25 Investigation, D.P., J.T.C., K.K., L.L.B., V.K. and S.A.; Resources, S.B., M.J.T., T.N., R.N. and  
26 J.L.H.; Writing-Original Draft, D.P., J.T.C. and J.L.H.; Writing-Review & Editing, D.P., J.T.C., K.K.,  
27 L.L.B., S.A., V.K., S.B., M.J.T., T.N., R.N. and J.L.H.; Visualization, D.P., J.T.C. and J.L.H.;  
28 Supervision, L.L.B., R.N., M.J.T., T.N., S.B. and J.L.H.; Funding Acquisition, V.K., S.B., T.N.,  
29 R.N., M.J.T. and J.L.H.

30 **This PDF file includes:**

31 Main Text

32 Figures 1 to 7

33 **Abstract**

34 Nuclear envelope budding (NEB) is a recently discovered alternative pathway for  
35 nucleocytoplasmic communication distinct from the movement of material through the nuclear  
36 pore complex. Through quantitative electron microscopy and tomography, we demonstrate how  
37 NEB is evolutionarily conserved from early protists to human cells. In the yeast *Saccharomyces*  
38 *cerevisiae*, NEB events occur with higher frequency during heat shock, upon exposure to  
39 arsenite or hydrogen peroxide, and when the proteasome is inhibited. Yeast cells treated with  
40 azetidine-2-carboxylic acid, a proline analogue that induces protein misfolding, display the most  
41 dramatic increase in NEB, suggesting a causal link to protein quality control. This link was further  
42 supported by both localization of ubiquitin and Hsp104 to protein aggregates and NEB events,  
43 and the evolution of these structures during heat shock. We hypothesize that NEB is part of  
44 normal cellular physiology in a vast range of species and that in *S. cerevisiae* NEB comprises a  
45 stress response aiding the transport of protein aggregates across the nuclear envelope.

46 **Significance Statement**

47 A defining feature of eukaryotes is the nuclear envelope, a double lipid bilayer that serves to  
48 isolate and protect the cells genetic material. Transport of large molecules over this barrier is  
49 believed to occur almost exclusively *via* the nuclear pores. However, herpes virions and mega  
50 ribonucleoproteins (megaRNPs) use an alternative means of transport – *via* nuclear envelope  
51 budding (NEB). Here, we show NEB is a ubiquitous eukaryotic phenomenon and increases when  
52 exposed to various forms of cellular stress. NEB frequency was maximal when the cell was

53 challenged with a drug that induces protein misfolding, indicating this transport pathway plays a  
54 role in protein quality control. These results imply that NEB is an underappreciated yet  
55 potentially fundamental means of nuclear transport.

56

## 57 **Main Text**

58

## 59 **Introduction**

60

61 The nucleus is the most prominent organelle in eukaryotic cells, enclosing most of the cellular  
62 genetic material within a double lipid bilayer called the nuclear envelope. These two membranes  
63 arose as a critical evolutionary step distinguishing eukaryotes from prokaryotes and restricting  
64 which molecules come into contact with the cellular DNA. As the nuclear envelope is not  
65 permeable to most of the molecules inside the cell, special structures called nuclear pore  
66 complexes (NPCs) exist on its surface that allow highly selective translocation over the nuclear  
67 membrane (1-3). Molecules smaller than 30-40 kDa can passively penetrate the NPC from the  
68 cytoplasm into the nucleus and *vice versa*, whereas bigger molecules require interaction with  
69 nuclear transport receptors and form importin/exportin complexes that are guided through the  
70 pores (4-8).

71

72 Since its discovery in 1954, the NPC has generally been accepted as the only means of  
73 communication between the cytoplasm and the nucleoplasm (9). However, herpes simplex virus  
74 replicates in the nucleoplasm and is released into the cytosol via an outwards budding of the  
75 nuclear envelope (10-13). This demonstrates another pathway for nuclear export and there have  
76 been several observations suggesting that nuclear envelope budding (NEB) also occurs in  
77 healthy cells, with different interpretations of this mechanism being suggested (14-27). These  
78 observations were made in a diverse set of organisms but primarily using cells that are under  
79 differentiation (embryonic cells) and various terminologies were given to describe the NEB  
80 process (Supplementary Table 1). The most recent reports were made in healthy developing  
81 *Drosophila melanogaster* larvae, in the sea urchin gastrula and in the budding yeast  
82 *Saccharomyces cerevisiae* (28-32). Previous studies have shown that budding events in *D.*  
83 *melanogaster* contain large ribonucleoprotein granules but whether this function is consistent in  
84 other cell types remains unknown (28, 31).

85

86 Evidence that material can be exported from the nucleus through NEB has sparked speculation  
87 that other large cargoes, such as protein aggregates, could be removed from the nucleus by a  
88 similar mechanism (33). Protein misfolding can be highly toxic to the cell and therefore multiple

89 stress-induced mechanisms have evolved to cope with proteotoxicity (34-36). Cells experiencing  
90 large-scale protein misfolding exhibit DNA mutagenesis, which is one of the first steps towards  
91 carcinogenesis (37), demonstrating the importance of protein quality control in the nucleus (38).  
92 Despite the cell's primary protein quality control factors, such as chaperones and the ubiquitin-  
93 proteasome system, being active in the nucleus, protein aggregates still form under stressful  
94 conditions such as heat shock, because these processes cannot fully cope with the quantity of  
95 misfolded proteins (39). In most occasions, protein aggregates will enter the nucleus for  
96 degradation but cases of nuclear misfolded proteins being transported out of the nucleus to be  
97 degraded in the cytoplasm have also been reported (39). Nuclear protein aggregates greatly  
98 exceed the 39 nm size limit of active transportation through the NPCs (40, 41), implying that an  
99 alternative pathway for their export is required if they are to be transported over the nuclear  
100 envelope.

101

102 As well as transporting material from the nucleus to the cytoplasm, NEB can also result in the  
103 transfer of a portion of the inner nuclear membrane (INM) to the outer nuclear membrane (ONM),  
104 which is continuous with the endoplasmic reticulum (ER). In addition to protein quality control  
105 mechanisms in the nucleus and cytoplasm, the endoplasmic reticulum (ER) is equipped with its  
106 own set of degradation pathways, to contend with the large quantity of newly synthesized proteins  
107 entering the ER (42). Protein degradation in the ER is highly dependent on the ubiquitin  
108 proteasome system and facilitates removal of both misfolded soluble and membrane proteins  
109 (43). Similarly, degradation of INM proteins can occur via biochemically similar pathways to ER-  
110 associated degradation of membrane proteins (44). Several branches of INM-associated  
111 degradation (INMAD) exist, each relying on a different E3 ubiquitin ligase to recognize and tag  
112 misfolded substrates through ubiquitination steps(45-47). These reflections pose the question:  
113 does NEB provide an escape valve needed for clearance of aggregated nuclear proteins? To  
114 address this issue, we have examined the NEB pathway of *S. cerevisiae* under five different  
115 stress conditions, all of which caused an increase in NEB events. We also show the presence of  
116 NEB in five different evolutionarily distant organisms (*Homo sapiens*, *Caenorhabditis elegans*,  
117 *Saccharomyces cerevisiae*, *Schizosaccharomyces pombe*, *Trypanosoma brucei*) under normal  
118 growth conditions, which reveals the evolutionary conservation of the NEB pathway. Our findings  
119 provide evidence that NEB is part of the cell's natural stress response and an important pathway

120 to consider when studying nuclear transport, especially with regard to the protein quality control  
121 system.

122

## 123 **Results**

124

### 125 **NEB increases in frequency during heat shock in *S. cerevisiae***

126 *S. cerevisiae* provides a well-understood model system, perfectly tailored to investigate if NEB is  
127 an active part of the cellular stress response. An easily applied stress impulse is heat-shock and  
128 we therefore subjected *S. cerevisiae* cells to a mild constant heat stress (38°C) for a time course of  
129 up to 90 minutes (Figure 1a). Cells were then cryo-immobilized for electron microscopy studies,  
130 which are able to simultaneously visualize both NEB events and protein aggregates, the latter  
131 appearing as electron dense content (EDC) (48) within the nucleus (Figure 1b). For each time point  
132 between 60 to 80 electron micrographs were acquired, each from a randomly chosen cell section  
133 that passed through the cell nucleus. NEB events were identified as electron dense material  
134 localized between the two nuclear envelopes, causing it to deform, with a small number of events  
135 showing budding of the nuclear membrane but seeming to lack an electron dense cargo (S1). A  
136 membrane bilayer was often, but not always, detectable around this material. NEB events  
137 commonly had an internal texture resembling the nucleoplasm (Figure 1b), but in some rare events  
138 the bud appeared to contain cytoplasmic material including ribosomes (Figure S1). In one case, a  
139 vacuole was seen engulfing a protrusion of the nucleus. This phenomenon is termed piecemeal  
140 microautophagy of the nucleus and has previously been described in nutrient deprived cells (49).  
141 Piecemeal microautophagy has a distinct morphology from the NEB events and were not included  
142 in our quantification.

143

144 Morphological variations of NEB (Figure S1) could represent different stages of the same process  
145 or different processes. Images were scored both for the presence of NEB events and EDC in the  
146 nucleus. Both NEB and EDC increased during heat shock, prior to decreasing near the end of the  
147 time course, which potentially reflects a cellular adaptation to the new temperature (Figure 1a).  
148 EDC reaches a maximum (83.3% of sections) after 15 minutes and stays relatively stable at this  
149 level until 90 minutes, at which point it is only present in 60.5% of sections (Figure 1a). NEB events  
150 were found in 2.4% of cellular sections in undisturbed cultures but this fraction significantly  
151 increased to 10.3% after 30 minutes of heat shock. The effect of a stronger heat shock treatment  
152 (42°C for 30 minutes) was examined to detect a possible correlation of the NEB frequency to the

153 level of stress. NEB frequency was also here significantly increased in comparison to the control  
154 as 16.6% of the nuclear sections displayed NEB (Figure S2).

155 To verify that the observed EDC in the nucleus are protein aggregates, immuno-electron  
156 microscopy against the disaggregase Hsp104 (50) and the model misfolding protein temperature  
157 sensitive mutant *guk1-7* (51) were performed. In these experiments, the secondary antibody is  
158 coupled to a gold particle for visualization using electron microscopy. Both Hsp104 and *guk1-7*  
159 localised to the EDC material upon heat shock (Figure 1c, e-f, n = number of examined structures).  
160 As a control, an anti-Hsp104 antibody was used to label the EDC in heat shocked wild type and  
161 *hsp104Δ* cells to validate the specificity of the labeling. High labeling density of the EDC could be  
162 detected in the wild type strain, whereas in the *hsp104Δ* strain almost no unspecific gold particles  
163 were found (Figure d,g).

164

165 The concurrent increase in frequency of NEB and protein aggregation strengthens the hypothesis  
166 that NEB may indeed have an important function during normal cellular stress response. This  
167 apparent correlation between the frequency of NEB with heat shock motivated us to test if this  
168 pathway is solely affected by heat-shock or if cells react in a similar fashion under different stress  
169 conditions.

170

### 171 **Hydrogen peroxide and sodium arsenite stressors also increase NEB frequency**

172 Cells may encounter a variety of stress conditions and each of them has a different impact on the  
173 cell (52). To investigate whether additional cellular stresses also correlated with an increased  
174 frequency of NEB events we challenged *S. cerevisiae* cells with multiple stress stimuli. A natural  
175 stimulus is aging which causes a significant induction of stress response pathways in *S. cerevisiae*  
176 (35, 53), and has previously been seen to trigger an increase in “nuclear herniations” (54). Several  
177 factors are responsible for a measurable decline in cellular and physical functions of aged cells,  
178 with one of them being aggregated misfolded proteins (55). We isolated replicatively aged  
179 biotinylated *S. cerevisiae* cells, using Streptavidin magnetic beads, from the young unbound  
180 population (56) and cryo-immobilized the cells. In old yeast cells, the frequency of NEB events was  
181 found to be 9% (Figure 2a, 2d; n=200 sections) which is significantly higher than an undisturbed *S.*  
182 *cerevisiae* culture (2.4%; n=337) (Figure 1a). However, the remaining younger population also  
183 displayed a significant increase in NEB events to 6.9% (n=204 sections; Figure 2d), indicating that  
184 these cells may also have been stressed by the mechanical handling steps associated with isolating

185 the old cells. Thus, we could not confirm the previous finding of significantly increased NEB events  
186 in old cells in comparison to young cells (54), in this experimental setup.

187

188 Cells of *S. cerevisiae* were also subjected to 90 minutes 0.6 mM H<sub>2</sub>O<sub>2</sub> (hydrogen peroxide,  
189 oxidative stress) and 60 minutes 0.5 mM NaAsO<sub>2</sub> (sodium arsenite, heavy metal stress). Treated  
190 cells, as well as a control cultures for each condition, were cryo-immobilized and prepared for  
191 analysis by electron microscopy. Cells that were treated with sodium arsenite had a NEB frequency  
192 of 6% (n=249 sections) and cells treated with hydrogen peroxide had a frequency of 5.9% (n=204  
193 sections) (Figure 2b-d). Both control samples had lower levels of NEB events, as found in  
194 undisturbed *S. cerevisiae* (2.4% for the sodium arsenite control for n= 337 and 1.5% for the H<sub>2</sub>O<sub>2</sub>  
195 control for n= 197, Figure 2d) . From this set of observations, we conclude that NEB is increased in  
196 hydrogen peroxide and sodium arsenite stress as well. .

197

### 198 **NEB frequency is highest under induction of protein misfolding**

199 All of the stressors examined above have previously been shown to increase rates of aggregation  
200 of misfolded proteins in the cytoplasm and within the nucleus (35, 57-59). To investigate whether  
201 or not the observed increase in NEB events is indeed correlated with proteotoxic stress, we  
202 examined *S. cerevisiae* cells after treatment with azetidine-2-carboxylic acid (AZC). AZC competes  
203 with the amino acid proline during translation and may be mistakenly incorporated into proteins.  
204 Since AZC has one fewer carbon atoms in its ring (4 carbon atoms instead of 5 as in proline), its  
205 incorporation into a polypeptide causes a different conformation of the amino acid backbone and  
206 this results in aggregation of proteins with non-native structures (60, 61). Cells were grown at  
207 normal temperature (30°C) and were treated with AZC, cryo-immobilized after 30 and 90 minutes  
208 and prepared for analysis by electron microscopy. Cellular viability upon treatment with all of the  
209 stressors mentioned above was not compromised, as validated with propidium iodide (PI) staining,  
210 indicative of plasma membrane rupture and thus cell death (Figure S3).

211 The NEB frequency was similar in untreated cells and cells after 30 min of AZC exposure (2.4% n=  
212 337 sections and 2.6% n= 114 sections respectively, Figure 2f). However, after 90 minutes of  
213 exposure to AZC, the number of NEB events dramatically increased in frequency, reaching 22%  
214 (Figure 2e-f; n= 100). This time-dependent increase in NEB after AZC exposure demonstrates a  
215 direct link between the NEB pathway and how the cell accommodates proteotoxic stress.

216

### 217 **NEB events are ubiquitinated**

218 Most proteins that are destined for degradation through the 26S proteasome system must first bind  
219 to a poly-ubiquitin chain (62). Moreover, ubiquitin signaling is known to target cytosolic proteins and  
220 organelles for degradation by autophagy (63, 64). To probe if the NEB cargo is targeted for protein

221 degradation via ubiquitin signaling, we performed immuno-EM analysis on *S. cerevisiae* cells with  
222 a polyclonal antibody that has a stronger affinity to poly-ubiquitin chains than to monomeric ubiquitin  
223 (Abcam ab19247). In order to stimulate an increase of the NEB events, cells were subjected to 30  
224 minutes of heat shock. Images of 60 randomly chosen cell sections were recorded and the number  
225 of gold particles per area of various cell structures were quantified (Figure 3a). Lipid droplets were  
226 used as a negative control (4 gold particles/ $\mu\text{m}^2$ ) (Figure 3a-b) and autophagosomes were chosen  
227 as a positive control (67 gold particles/ $\mu\text{m}^2$ ). The nucleoplasm (excluding areas containing EDC)  
228 did not differ from the negative control (4 gold/ $\mu\text{m}^2$ ) whereas EDC (protein aggregates) were  
229 labeled fivefold more frequently (21 gold/ $\mu\text{m}^2$ ) (Figure 3a-b). Similarly, NEB events (17 gold/ $\mu\text{m}^2$ )  
230 were labeled fourfold more frequently than lipid droplets (4 gold/ $\mu\text{m}^2$ ). In order to achieve a higher  
231 n number for the NEB events, cells were actively traced and selected based on the presence of  
232 NEB events. Most of the gold particles identified as associated with NEB events had a preference  
233 of localizing in close proximity to the membrane of the bud, but in other examples it would localize  
234 more centrally. (Figure 3b, S3). These results confirm the presence of ubiquitin in both EDC and  
235 the NEB events recorded during heat shock in *S. cerevisiae*.

236

### 237 **Proteasome inhibition increases NEB event frequency**

238

239 If our hypothesis were correct that NEB could function to remove misfolded proteins from the  
240 nucleus that cannot be accommodated by the proteasome, then the inhibition of the proteasome  
241 should alter the NEB event frequency. To investigate this, the proteasome was inhibited using two  
242 different methods. First, we treated *pdr5Δ* cells (65), deficient in a drug efflux pump with the MG132  
243 drug which is known to partially inhibit proteasomal activity (66). This treatment led to an observed  
244 NEB frequency of 7% (n=200), a significant increase compared to the control group (2.5%, n=200)  
245 (Figure 3c). In order to achieve a stronger proteasomal inhibition, the Rpn4 transcriptional activator  
246 of genes encoding proteasomal subunits (43, 67) was deleted and the derived strain was prepared  
247 for analysis. Inhibition of the proteasome was confirmed by performing western blots against  
248 ubiquitin, since decreased proteasome activity will result in an increase of ubiquitinated proteins  
249 (Figure 3d). Most of the observed NEB events (11 out of 15) in the *rpn4Δ* cells had a distinct  
250 electron dense appearance and no obvious membrane surrounded this electron dense material  
251 (Figure 3e). In comparison to wild type cells which displayed a NEB frequency of 2.4% (n=337),



252 *rpn4Δ* cells had NEB events in 15% of the sections (n=100) (Figure 3c). These results suggest that  
253 NEB pathway is an alternative to the ubiquitin proteasome system.

254

255

#### 256 **NEB structures contain Hsp104-GFP**

257 To probe for the presence of aggregated proteins within NEB, we performed immuno-EM in heat  
258 shocked cells (38°C for 30 minutes) with an anti-GFP antibody in cells expressing Hsp104-GFP.  
259 Even though Hsp104 is not an aggregate per se, it is a well-characterized chaperone which  
260 localizes to aggregated proteins in the nucleus and the cytoplasm, where it acts as a disaggregase,  
261 (68-70) and supports the degradation of ubiquitinated membrane proteins in the ER-associated  
262 degradation pathway(71). In comparison to the negative control (lipid droplets, 1.7 gold/  $\mu\text{m}^2$ ), NEB  
263 events were highly labeled by gold particles (122 gold/ $\mu\text{m}^2$ ) comparable to the positive control  
264 (EDC, 144 gold/ $\mu\text{m}^2$ ) (Figure 3f-g). This finding is consistent with either a function of NEB in  
265 transporting misfolded nuclear proteins to the cytoplasm, or INM proteins to the ER for degradation.

#### 266 **NEB structures are not misassembled NPCs**

267 It has been suggested the NEB events are misassembled NPCs (54, 72). When certain key genes  
268 required for NPC assembly are deleted, herniations of the nuclear envelope similar to NEB events  
269 are observed (73, 74). These types of herniations have a distinct morphology with a 'neck  
270 resembling' formation between the vesicle and the INM which was revealed to be a defective NPC  
271 by subtomogram averaging (75). These NPC-exposing herniae are then degraded by autophagy  
272 (75, 76). In addition, NPCs assemble via an inside-out mechanism during which the INM evaginates  
273 slightly, although functional NPC assembly does not resemble NEB (77).

274

275 To clarify if our observed NEB could also be misassembled NPCs, we performed immuno-EM using  
276 an antibody that recognizes four NPC components (Nup62, Nup153, Nup214 and Nup358) on both  
277 undisturbed *S. cerevisiae* cultures as well as the aged cells. In the undisturbed culture, the majority  
278 (67%) of NPCs observed were labeled by gold particles (positive control; n = 95) (Figure 4a, 4e)  
279 and only 16.7% of lipid droplets (negative control; n=82). Only in one case was a NEB event labeled  
280 (16.6%, n=6) (Figure 4c) whereas all other NEB events were unlabeled (Figure 4b-c, 4e). In the  
281 old yeast cells, 81% of the observed NPCs were labeled by gold particles (positive control; n=100)  
282 (Figure 4d-e) whereas only 8% of lipid droplets were labeled (negative control; n=100) (Figure 4e).  
283 In contrast, only one atypical NEB event was labelled by a gold particle (10%; n= 10) (Figure 4e).

284

285 To further support this distinction between NEB and herniation, a comparison of the detailed  
286 morphology of NEB events with the previously reported herniations was accomplished through  
287 dual-axis electron tomography of the nuclear envelope in *S. cerevisiae*. This analysis showed that

288 the selected NEB event was completely enveloped in a lipid bilayer and wedged in between the  
289 two nuclear membranes (Figure 4f-g). Moreover, the 3D reconstruction revealed that the vesicle  
290 contained between the lipid membranes was complete and was not attached to either nuclear  
291 membrane by a 'neck' with only the outer nuclear membrane extending towards the cytoplasm. As  
292 such this morphology was strikingly different to that previously identified as associated with the  
293 misassembly of NPCs (77). It is also noteworthy that the 3D reconstruction did not show an obvious  
294 connection of the NEB events with the ER, separating these two compartments. A different  
295 morphology of a nuclear envelope-ER connection in comparison with the NEB events can also be  
296 seen in the acquired thin sections of nuclei (Figure S5). As such, both the immuno-EM results and  
297 the 3D morphology of NEB events suggest that the partial or incomplete assembly of NPC and  
298 NEB are distinct structures. However, the possibility that a small fraction of the protrusions  
299 quantified as NEB events in this study may be better assigned NPC related structures remains.

300

### 301 **The NEB pathway is part of normal cellular function from humans to protists**

302 To gain insights into the evolutionary conservation of NEB we imaged and quantified NEB events  
303 in thin sections of nuclei in human mast cells (HMC-1), *C. elegans* nematodes, two yeast species  
304 *S. cerevisiae* and *S. pombe*, as well as the parasitic protozoan *T. brucei* using electron microscopy  
305 (Figure 5a). Since the HMC-1 nucleus has a diameter of ~8  $\mu\text{m}$  (Figure 5b) we chose to examine  
306 sections corresponding to a little more than one nuclear volume (8  $\mu\text{m}/70\text{ nm}$  thick sections  $\approx 114$   
307 serial sections/nucleus). By the same logic, the number of thin sections examined corresponded to  
308 approximately four total nuclear volumes of *T. brucei* and *S. pombe* and five nuclear volumes of *C.*  
309 *elegans* and *S. cerevisiae* cells. For *C. elegans*, images of nuclei were acquired from intestinal cells  
310 and oocytes.

311

312

313 In HMC-1 cells, three morphologically different categories of NEBs were observed (Figure 5a). The  
314 most commonly observed morphology was outwards protruding buds, occurring in 7.3% of nuclear  
315 sections (n = 9; Figure 5a-b), which will hereafter be referred to as type 1 NEB. In a few cases of  
316 type 1 NEB events, both the outer and inner membranes expand towards the cytoplasm with  
317 electron dense material partially wrapped by the nuclear envelope bud and the protrusion is open  
318 to the nucleoplasm (Figure 5b). In most of the type 1 NEB events however (n= 6), the electron  
319 dense material is clearly located between the two membranes with only the outer membrane  
320 expanding towards the cytoplasm. The second type of NEB events observed had the inner nuclear  
321 envelope expanding towards the nucleoplasm. These were termed type 2 NEB events, and  
322 occurred in 3.3% of sections. Finally, for type 3 NEB events the transported material is situated  
323 between the nuclear membranes with no clear protrusion in either direction. This occurred in 2.5%

324 of sections. Some thin sections of nuclear envelopes contained more than one bud, revealing that  
325 NEB can occur at multiple sites on the same nucleus (Figure S1).

326

327 NEB events are observed to occur in all five organisms examined (Figure 5a) but with varying  
328 frequency. The lowest frequency of NEB events was in *S. cerevisiae* (2.5%, n=161 sections),  
329 followed by *S. pombe* (6.9%, n=101 sections), *T. brucei* (8.4%, n=119 sections), *C. elegans* (11.6%,  
330 n=138 sections) and most frequently in HMC-1 cells (13.1%, n=122). Only type 1 NEB events were  
331 identified in all organisms other than HMC-1 (Figure 5b-e), except for a single event in *S. pombe*  
332 that we classified as type 3 (Figure 5f). The morphology of the NEB events varied between and  
333 within species, with some buds being small and having indistinct electron dense material whereas  
334 other events were large and had a membrane surrounding the material. The average size of the  
335 NEB events did not show a large variation between species except for HMC-1 cells, which yielded  
336 distinctly larger buds (Figure S6).

337

338 The morphology of NEB was compared in more detail through electron tomography reconstructions  
339 of NEB events from both *S. pombe* and *T. brucei*. In *S. pombe*, one event of type 1 NEB was  
340 visualized (Figure 6a-c) whereas two type 1 NEB events were reconstructed from *T. brucei* (Figure  
341 6d-h). The NEB event that appeared to have progressed the furthest had distinct regions of higher  
342 electron density surrounding the base of the bud (Figure 6g, black arrow). For both *S. pombe* and  
343 *T. brucei* the cargoes of the NEB events were found between, and fully separated from, the nuclear  
344 membranes, and were similar to what was observed in *S. cerevisiae* (Figure 4g). Moreover, the  
345 NEB event observed for *S. pombe* clearly displayed the presence of a lipid bilayer that completely  
346 enveloped the cargo (Figure 6b). However, a clear bilayer surrounding the transported material  
347 could not be ascertained in the *T. brucei* tomographic reconstruction. Since in many cases the  
348 transported material appeared to have a vesicle-like structure, we tested for an involvement of the  
349 ESCRT pathway known to facilitate the formation of cellular vesicles, and already implicated in the  
350 formation of morphologically similar protrusions of the nuclear envelope (78, 79). However, ESCRT  
351 components did not appear to contribute to the formation of NEB events in our experiments (S7).

352

353 We conclude that NEB was observed in all species examined in this study. Our findings combined  
354 with previous published observations are summarized into a phylogenetic tree (Figure 7),

355 illustrating how the NEB pathway is evolutionarily conserved among eukaryotes and is part of  
356 normal cellular function in an evolutionarily diverse sampling of species.

357

358

359

## 360 **Discussion**

361

362 Nuclear envelope budding (NEB) has been observed since 1955 as nuclear herniations across a  
363 diverse range of organisms and at different developmental stages. This phenomenon is well  
364 studied with regards to its role in virus infection and the detailed structure of NEB events have  
365 been revealed using cryo-electron tomography of infected cells (11). Yet, NEB remains viewed as  
366 an irregularity rather than a normal route for transport over the nuclear envelope in healthy  
367 mature cells. We present here three different lines of evidence that NEB is a widely conserved,  
368 physiologically normal cellular process that increases in frequency due to cellular stress and is  
369 specifically activated by an increase in protein aggregation. Firstly, we observed that five distinct  
370 stress conditions: heat shock; hydrogen peroxide; arsenite; proteasome inhibition and AZC  
371 treatment, all led to an increase in the frequency of NEB, with the AZC treatment most  
372 prominently activating the NEB pathway among all stressors. Secondly, immuno-EM revealed the  
373 presence of ubiquitin and Hsp104, a protein disaggregase, in the cargo of the buds, which  
374 supports our hypothesis that this pathway is involved in protein degradation. Thirdly, NEB events  
375 were detected in every species examined, from *T. brucei* to human cell line HMC-1. Collectively,  
376 these results suggest a role of the NEB pathway in protein quality control and highlight its  
377 evolutionary conservation. These observations shed light on the cell's mechanism to cope with  
378 proteotoxic stress and identify a new module of the nuclear quality control system. Moreover,  
379 since the NEB pathway is evolutionarily conserved and is also present in human cells, this work  
380 provides a new perspective for studying cellular stress response related human diseases (80).

381

### 382 **Nuclear budding and the protein quality control system**

383 Although chaperones and the ubiquitin-proteasome system are known to clear misfolded proteins  
384 from the nucleus (81, 82), the nuclear protein quality control system is not as well characterized  
385 as the cytosolic and the ER systems (39). Various cellular events and pathways have been  
386 described whereby aggregated proteins and chaperones are imported from the cytosol and into  
387 the nucleus and these pathways are consistent with observations that 80% of the proteasomes at  
388 steady state are located within the nucleus (83, 84). An alternative pathway, however, has also  
389 been reported for which ubiquitinated proteins in mammalian cells and in the nematode *C.*

390 *elegans* are transported from the nucleus to the cytosol via a ubiquitin-associated domain-  
391 containing protein (UBIN) (85).  
392  
393 Some proteins that exceed the size limit of the NPCs may nevertheless enter the complex after a  
394 reversible conformational change in their tertiary structure (86). Although large aggregates could  
395 potentially be transported in a similar manner, it stands to reason that under conditions of cellular  
396 stress, the transportation of many aggregates through NEB events would provide a more efficient  
397 and therefore advantageous gateway into or out of the nucleus. In support of the above  
398 supposition, a process called “piecemeal microautophagy of the nucleus” has been described in  
399 *S. cerevisiae* in which nuclear envelope buds are released directly into the vacuole lumen for  
400 degradation (49).  
401  
402 Our observations that NEB increases during five different cellular stresses (heat shock, hydrogen  
403 peroxide, arsenite, proteasome inhibition and AZC exposure) in *S. cerevisiae* strongly implicate  
404 that NEB is related to the protein quality control system. Aging has been previously shown to  
405 influence the formation of NEB-like events in the perinuclear space (54), with an apparent  
406 increased in replicatively aged cells of about 17% when compared to the remaining young  
407 population (stated as mixed population). Though the isolation method we used in this study  
408 involved a higher number of isolation steps in comparison with the aforementioned literature, we  
409 were unable to reproduce the difference in NEB frequency between the old and young population.  
410 There is a significant increase in both isolated cell groups with a stronger effect on the aged cells.  
411 Possible reasons for the inability to reproduce what has been shown before could be due to the  
412 differences in the isolation process. Conclusions that can be safely extracted are that mechanical  
413 stress is also able to increase NEB frequency and aging most likely creates a further stressful  
414 environment for the cells.  
415 The presence of ubiquitin and Hsp104 in the NEB events lends further support for this  
416 functionality due to the fact that ubiquitin is involved in many protein quality control pathways  
417 including the ubiquitin-proteasome system and macroautophagy, and Hsp104 is known to  
418 mediate disaggregation of misfolded proteins (87-89). The large increase in NEB events due to  
419 the AZC treatment reinforces this putative role of NEB as a cellular stress response. Since AZC  
420 acts upon protein conformational stability directly without influencing other parameters such as  
421 the external temperature or membrane fluidity, these experiments constitute a more targeted  
422 challenge for the protein quality control system. Additionally, in a previous study where  
423 aggregated proteins were identified after cellular stress induced by AZC, arsenite and hydrogen  
424 peroxide treatment, AZC had the largest number of affected proteins among the stressors (58). A

425 strong effect of AZC on the folding of proteins could explain why NEB is more prominent in the  
426 AZC-induced stress response when compared to the cellular response to other stressors.  
427 Finally, the connection between proteasomal activity and NEB frequency supports the association  
428 with the protein quality control system. Inhibition of proteasomal activity showed a clear increase  
429 in NEB events which could be translated as a cellular attempt to cope with a large number of  
430 misfolded proteins or proteins which are normally degraded by the proteasome. Most of the NEB  
431 events recorded in the *rpn4Δ* strain, had a distinct morphology compared to NEB events triggered  
432 by other stressors. This observation may reflect a difference in the nature and composition of the  
433 transported material, indicating that NEB may well be involved in more than one cellular activity.

#### 434 **The distinction between NEB events and defective NPCs**

435 Deleting key genes required for NPC assembly can induce nuclear envelope “herniations” that  
436 appear somewhat similar in structure to NEB events (73-76, 90, 91). These herniations are  
437 believed to arise from the outer nuclear membrane sealing above the defective NPC, thereby  
438 capturing the transported material between the NPC and the nuclear envelope and creating a  
439 bulge resembling a budding vesicle. If this phenomenon underpinned our observed NEB events,  
440 the intermembrane vesicle should be connected to the INM where the defective NPC is located. A  
441 connection between the INM and intermembrane vesicle resembling a “neck” would also be a  
442 plausible intermediate state in the formation of a vesicle from the INM that encloses nuclear  
443 material. Such neck-like connections between the INM and contents of the bud were previously  
444 observed in strains deficient in TorA, an ER protein with ATPase activity, and various Nups that  
445 lead to defective NPCs (31, 73, 74). Furthermore, the size of the necks seen in NEB events after  
446 hyperactivation of Chm7, a component of the ESCRT-III like complex, and misassembled NPCs  
447 were compared previously and it was concluded that while appearing similar, both features were  
448 morphologically distinct (79). Neck-like or NPC-like structures connecting the intermembrane  
449 vesicles to the INM were not visible in any of our acquired tomograms, suggesting that our  
450 tomograms contain buds in which the intermembrane vesicle or material has fully formed and  
451 these buds are not the result of NPC malformation. In addition to these morphological differences  
452 revealed by 3D tomographic reconstructions, the immuno-EM assay demonstrated that the NEB  
453 events were not associated with NPCs since only two of the 16 observed events in this assay  
454 were labeled for NPC proteins.

455

#### 456 **The evolutionarily conserved nature of NEB**

457 We observed NEB events within the cells of all species we examined including animals, fungi and  
458 protozoa. There is a thread stretching back through the scientific literature which shows that NEB  
459 events have repeatedly been observed in animals, plants and protists (Table S1). The genetic  
460 diversity of these observations is summarized in Figure 7, which presents a phylogenetic tree

461 illustrating that NEB events have been observed for 18 different species within the eukaryotic  
462 domain. Therefore, despite NEB not being widely recognized as a means of nuclear transport,  
463 these observations combine to create a compelling argument that NEB is an evolutionarily  
464 conserved phenomenon of eukaryotic cells.

465

466 From our sequence of experiments using the model systems *S. cerevisiae* we concluded that  
467 NEB events facilitate the removal of aggregated proteins from the nucleus. This pathway could  
468 potentially also support the co-transportation of other cellular components required for protein  
469 degradation. Since NEB embodies an alternative route for transport over the nuclear envelope  
470 that has been largely overlooked, our observations highlight an opportunity for discovery in  
471 eukaryotic cell biology where a broad range of interconnected questions may emerge. It will be  
472 necessary to determine if the frequency of NEB is also increased by cellular stressors in human  
473 cells, and in particular additional cellular stress associated with aging. One issue is the important  
474 role of protein aggregation within a variety of neurodegenerative diseases such as Alzheimer's  
475 and ALS (80, 92). Should NEB also be an underappreciated mechanism for the clearance of  
476 protein aggregates in human neurons then this potentially has far-reaching neurological  
477 implications.

478

479

480

## 481 **Materials and Methods**

482

### 483 **Antibodies and reagents**

484 Please refer to Supplementary tables 3 and 4 for a detailed information on antibodies, strains,  
485 primers and reagents.

486

### 487 **Experimental models**

488 HMC-1 cells

489 Human mast cell line 1 (HMC-1; (93)) cells were cultured in Iscove's modified Dulbecco's medium  
490 (IMDM). The cells were then treated with 10% exosome-depleted fetal bovine serum (FBS), 100  
491 units/ml streptomycin, 100 units/ml penicillin, 2 mM L-glutamine, and 1.2 U/ml alpha-thioglycerol  
492 in incubators kept at 37°C and 5% carbon dioxide (94, 95).

493 *Trypanosoma brucei*

494 Procyclic *T. brucei* strain 427 was cultured in SDM-79 media with 20% fetal bovine serum.

495 Cultures were prepared and maintained at a concentration of  $5 \times 10^5$  and  $1 \times 10^7$  cells per mL  
496 (96-98).

497 *Schizosaccharomyces pombe*

498 Logarithmically growing wild type fission yeast *S. pombe* were grown at 30°C in YE5S medium  
499 (94, 99, 100).

500 *Caenorhabditis elegans*

501 The *C. elegans* wild type reference strain was the Bristol N2 variety. The worms were cultured on  
502 normal growing media plates (NGM plates) and the *E. coli* strain OP50 was used as a food  
503 source. The worms were maintained at the optimal temperature of 25°C (101, 102). Adult worms  
504 were used for electron microscopy.

505 *Saccharomyces cerevisiae*

506 Wild type cells of *S. cerevisiae* (BY4741) were cultured in YPD media at 30°C (103). A strain with  
507 endogenous *HSP104* C-terminally tagged with GFP (104) was used for old cell isolation, heat  
508 shock and sodium arsenite experiments. The deletion mutants *hsp104Δ* and *rpn4Δ* are from the  
509 YKO collection (EUROSCARF, Frankfurt, Germany). Strains used for investigating involvement of  
510 the ESCRT-pathway in NEB and the *ptr5Δ* strain are from this study (see yeast strains list).

511 Transformations were performed following standard procedures (105), and gene deletions and  
512 endogenous tags were integrated via homologous recombination (106). For the hydrogen  
513 peroxide experiment, cells were grown in synthetic complete media (with yeast nitrogen base,  
514 without amino acids, pH 5.5, complete supplement mixture of amino acids and 2% glucose).

515 **High-pressure freezing for electron microscopy and tomography**

516 All samples used in this study has been prepared using high-pressure freezing followed by freeze  
517 substitution. HMC-1 cells were loaded into membrane carriers and were high-pressure frozen in a  
518 Leica EM PACT1 (Leica microsystems, Wetzlar, Germany). *T. brucei* and *S. pombe* were loaded  
519 into carriers and were high-pressure frozen in a Leica EM PACT2. *C. elegans* and *S. cerevisiae*  
520 samples were loaded into aluminum specimen carriers and were high-pressure frozen in a  
521 Wohlwend Compact 3 (M. Wohlwend GmbH, Sennwald, Switzerland). Yeast paste from wild type  
522 *S. cerevisiae* cells was used as a cryoprotectant filling the space surrounding the worms.

523 For a summary of all high-pressure freezing and freeze substitution experiments see table 1. For  
524 all samples (except *S. pombe*) a short freeze substitution protocol was applied, using 2% uranyl  
525 acetate dissolved into acetone (UA; from 20% UA stock in methanol) for one hour (94, 97, 107).  
526 To increase the penetration into intact worms, the UA solution was left on the samples for 14h (as  
527 the temperature was increased to -50°C). The UA incubation was followed by two washes in  
528 100% acetone for one hour each. Before embedding, the temperature was raised from -90°C to -  
529 50°C overnight with a rate of 3°C/h. Samples were then embedded in K4M or HM20 resin in  
530 increasing concentrations of 20%, 40%, 50%, 80% and finally three times in 100% plastic (2  
531 hours per solution). Polymerization of the plastic occurred over 48h using UV light at -50°C  
532 followed by 48h in room temperature. *S. pombe* cells were high-pressure frozen and fixed



533 through freeze substitution (long protocol) with anhydrous acetone containing 0.25% UA, 0.1%  
534 dehydrated glutaraldehyde and 0.01% osmium tetroxide (OsO<sub>4</sub>) (99, 100, 108, 109).  
535 For tomography, serial semi thick sections of about 210-250 nm (*S. pombe*) and 350 nm (*T.*  
536 *brucei* and *S. cerevisiae*) were cut and samples were poststained with 2% UA in dH<sub>2</sub>O followed  
537 by Reynold's lead citrate. Gold particles (15 nm) from British Bio Cell were applied to both sides  
538 of the grid to be used as fiducial markers. (96, 97, 99).  
539 All other samples were sectioned in 70 nm thin sections and placed on either copper slot or mesh  
540 grids. Sections were stained with 2% UA for 5 minutes and Reynold's lead citrate for 1 minute  
541 (110). Washing steps after each staining were performed in dH<sub>2</sub>O.

#### 542 **Immuno-electron microscopy**

543 For the immuno-labeling experiments, the same high-pressure frozen samples embedded in  
544 HM20 resin were used, a benefit of that short FS protocol (107). For a summary of these  
545 experiments, see table 2. Grids with 70 nm thick sections were fixed in 1% paraformaldehyde  
546 (PFA) in PBS for 10 minutes. After three PBS washes of 1 minute each, samples were blocked  
547 with 0.1% fish skin gelatin and 0.8% BSA in PBS for 1 hour. For detection of NPC proteins, grids  
548 were then incubated in a 1:50 dilution of mAb414 (BioLegend, San Diego, USA) for two hours,  
549 followed by a 1:150 dilution of rabbit anti-mouse immunoglobulins (Agilent/Dako, Glostrup,  
550 Denmark) for an hour, and then a 1:70 dilution of 10 nm gold-conjugated protein A (CMC UMC  
551 Utrecht, The Netherlands) for 30 minutes. For labeling of ubiquitin, grids were incubated in a 1:20  
552 dilution of antibody ab19247 (Abcam, Cambridge, UK) for 2 hours. Detection of GFP was  
553 performed by using a 1:5, 1:10, or 1:30 dilution of ab6556 (abcam, Cambridge, UK) and  
554 detection of Hsp104 by using a 1:100 dilution of ab69549 (abcam, Cambridge, UK) incubated  
555 overnight. Goat-anti-Rabbit IgG 10 nm gold (Electron Microscopy Sciences, Hatfield PA, USA)  
556 was then used at a 1:20 dilution for an hour. All incubations were performed at room  
557 temperature, except for the primary antibody which was kept at 4°C. Three washing steps (20 min  
558 in PBS) were carried out after incubations with each antibody. 2.5% glutaraldehyde was applied  
559 to sections for 1 hour followed by three washes (1 min in dH<sub>2</sub>O). Sections were then contrast  
560 stained in 2% UA for 5 minutes (wash 3x 2 min in dH<sub>2</sub>O) and 1 minute in Reynold's lead citrate  
561 (washed 5x 1 min in dH<sub>2</sub>O).

#### 562 **Image acquisition and electron tomography**

563 All thin sections were imaged at 120 kV either on a LEO 912 OMEGA (Zeiss, Krefeldt, Germany)  
564 equipped with a 2k x 2k VELETA Olympus CCD camera or on a Tecnai T12 transmission  
565 electron microscope equipped with a Ceta CMOS 16M camera (FEI Co., Eindhoven, The  
566 Netherlands). Double axis tilt series of serial sections of *T. brucei* samples were acquired every  
567 degree using the serialEM software (111) on a Tecnai TF30 300 kV IVEM microscope (FEI Co.,  
568 The Netherlands) equipped with a Ultrascan 785 4k x 4k camera binned to 2k x 2k (pixel size 1

569 nm). For *S. pombe*, digital images (Gatan Ultrascan 890 or 895 camera, pixel size 1.5 nm) single  
570 axis tilt series were taken every 1.5° over a ±60°–65° range operating a Tecnai TF20 electron  
571 microscope (FEI Co., Eindhoven, The Netherlands) (99). For *S. cerevisiae*, double axis tilt series  
572 of serial sections were acquired on a Tecnai TF30 300 kV microscope (FEI Co., The Netherlands)  
573 equipped with a Gatan One View camera (pixel size 1.6 nm, increment 1.5° over a ±60° range).  
574 Tomograms were acquired with the use of serialEM (111). The tomographic reconstruction was  
575 performed using of the IMOD software package (112).

#### 576 **Isolation of old yeast cells**

577 Isolation of old yeast cells was performed according to Smeal et al. with some modifications in  
578 order to reduce mechanical stress and improve the cell morphology for electron microscopy (56).  
579 In brief, the cell surface of exponentially growing cells was labeled with biotin by incubating the  
580 cells with 0.5 mg/ml Sulfo-NHS-LC biotin (#21335, Thermo Fisher scientific) for 20 min at room  
581 temperature. Cells were grown in YPD, harvested prior saturation of culture, and washed in PBS  
582 + 0.5% glucose. Biotinylated cells were labeled with 17.5 ug/ml Streptavidin magnetic beads  
583 (#21344, Thermo Fisher scientific) for 1.5 hours followed by 3 x 15 min magnetic sorting with PBS  
584 + 0.5% glucose washes in between. Another two rounds of growth, streptavidin-labeling, and  
585 sorting was performed. The old cells and their unbound daughters were recovered in YPD for 4  
586 hours before high-pressure freezing.

#### 587 **Stress treatments of *S. cerevisiae***

588 Cells were grown at 30°C to mid exponential phase. For mild heat shock, the culture was shifted  
589 to 38°C and samples were collected after 0, 5, 15, 30, 45, and 90 minutes (113). The more  
590 severe heat shock was performed at 42°C for 30 min. For hydrogen peroxide, sodium arsenite,  
591 and AZC treatments the culture was split into two, one kept as unstressed control and one treated  
592 with the stressor. Cells were exposed to 0.6 mM hydrogen peroxide for 90 minutes, 0.5 mM  
593 sodium arsenite for 60 minutes, or 1 mg/mL AZC for 30 and 90 minutes (corresponding control  
594 culture was grown for 60 minutes after mid exponential phase). Cells were harvested by filtration  
595 followed by high-pressure freezing.

#### 596 **Proteasome inhibition**

597 The *rpn4Δ* strain and a wild type control was grown to mid exponential phase and prepared for  
598 high-pressure freezing. The *pdr5Δ* strain was grown to mid exponential phase prior addition of  
599 either 50 μM MG132 (#C2211, Sigma-Aldrich) dissolved in DMSO or an equivalent volume of  
600 DMSO. A 60 min incubation at 30°C followed before cells were prepared for high-pressure  
601 freezing.

602

#### 603 **Analysis of polyubiquitination**

604 Cells were cultured and treated as described above. Mid-exponentially grown yeast  
605 corresponding to  $OD_{600} = 20$  was harvested, washed once in distilled water and resuspended in 1  
606 ml lysis buffer (100 mM Tris pH 7.5, 100 mM NaCl, 5 mM ethylenediaminetetraacetic acid, 1 mM  
607 dithiothreitol, 1 mM phenylmethylsulfonyl fluoride, 20 mM N-ethylmaleimide). Homogenisation  
608 was conducted via an Avestin Emulsiflex C-15, applying a homogenization pressure of 18 000  
609 psi. Samples were cleared from cell debris and unlysed cells by centrifugation for 5 min at 3500  
610 rcf and 4°C. 100  $\mu$ l of cleared lysate was mixed with the same volume of 2x Laemmli buffer (100  
611 mM Tris pH 6.8, 4% SDS, 20% glycerol, 0.2% bromophenol blue, 200 mM 2-mercaptoethanol)  
612 and incubated for 15 min at 95°C. The samples were then applied for SDS-PAGE and  
613 immunoblotting following standard protocols. Equal loading was controlled via Ponceau S staining  
614 directly after wet electrotransfer on PVDF membranes and blots were decorated with an anti-  
615 ubiquitin antibody (1:1000, HRP-conjugated, P4D1, sc8017, Santa Cruz). Clarity Western ECL  
616 Substrate (BIO-RAD, 1705060) and a ChemiDoc XRS+ Imaging System (BIO-RAD, 1708265)  
617 were used for detection

618

619

#### 620 **Analysis of cell death**

621 Loss of membrane integrity was assessed with propidium iodide (PI) staining as previously  
622 described (114). Briefly, cells were harvested in 96-well plates after the respective stressor/mock  
623 treatment and resuspended in 250  $\mu$ l of PI solution (100  $\mu$ g/l PI in phosphate buffered saline PBS;  
624 25 mM potassium phosphate, 0.9% NaCl; adjusted to pH 7.2). After 10 min incubation in the dark,  
625 cells were washed with 250  $\mu$ l of PBS and analysed via flow cytometry (Guava easyCyte 5HT;  
626 Merck group). 5000 events were recorded per strain and condition using InCyte software (3.1).

627

#### 628 **Confocal microscopy**

629 For visualization of nuclei, yeast cells were harvested and resuspended in DRAQ5 staining  
630 solution (5  $\mu$ M DRAQ5 in PBS). After 10 min incubation in the dark, cells were washed once with  
631 PBS and immobilized on agar slides. Specimen were analyzed with a ZEISS LSM700 microscope  
632 using ZEISS ZEN blue software control. Plan-Apochromat 63x/1.40 Oil M27 objective was  
633 employed. Appropriate filter settings were used to visualize GFP and DRAQ5. Micrographs were  
634 analyzed and processed with the open-source software Fiji (115). To reduce image noise,  
635 Gaussian filtering ( $\sigma = 1$ ) was applied, followed by background subtraction (rolling ball radius =  
636 100 pixels). Pictures within an experiment were captured and processed in the same way.

637

#### 638 **Phylogenetic tree**

639 A phylogenetic tree was constructed showing all the organisms where NEB events have been  
640 observed. The tree was generated based on the NCBI taxonomy browser for scientific names and  
641 visualized by the EvolView online software (<http://www.evolgenius.info/evolview/>).

#### 642 **Statistics and reproducibility**

643 The frequency of NEB events was achieved by counting the number of events present in  
644 approximately 100-200 thin sections of nuclei. The percentage of sections containing events in  
645 each organism was presented as a bar graph. For the NPC immuno-EM assay, different cell  
646 compartments (NPCs, NEBs and lipid droplets) were categorized as labeled or not labeled based  
647 on the presence or absence of gold particles. Similarly, the percentage of labeled compartments  
648 was presented as a bar graph. For the statistical analysis, different statistical tests were  
649 examined but a non-parametric Wilcoxon test was performed as our data represent frequencies  
650 and the numerical values are not following a normal distribution nor are continuous variants  
651 (values were considered as 0 for the absence of events and 1 for the presence of events).. The  
652 test was performed using the MATLAB multi-paradigm programming language. For further details  
653 on the examined statistic tests see Supplementary table 2. . For the ubiquitin and Hsp104-GFP  
654 immuno-EM, the area and number of gold particles of different cell compartments were measured  
655 using IMOD (<https://bio3d.colorado.edu/imod/>). The amount of gold particles per area was  
656 presented as bar graph. For cell death analysis,  
657 results are displayed either as dot plots (if  $n \leq 5$ ) where mean (square), median (centre line) and  
658 s.e.m. are depicted, or as box plots (if  $n > 5$ ) with mean (square) and median (centre line) as well  
659 as whiskers presenting minima and maxima within 2.2 interquartile range (IQR). Outliers were  
660 defined by the 2.2-fold IQR labelling rule. Normal distribution of data was examined with a  
661 Shapiro-Wilk's test and homogeneity of variances was evaluated with a Levene's test. A student's  
662 t-test was used to compare between two groups and displayed significances are two-sided, and a  
663 one-way ANOVA with a Bonferroni post hoc test was applied to compare between three and  
664 more groups. Significances are indicated with asterisks: \*\*\*\* $p < .0001$ , \*\*\* $p < .001$ , \*\* $p < .01$ , \* $p < .05$ ,  
665 n.s. not significant. Further information on sample size can be found in the respective figure  
666 legends. All figures were processed with Origin Pro 2017 or Adobe Illustrator CS6 (Adobe).

667

#### 668 **Data availability**

669 Links to the online library for the 2D electron microscopy pictures acquired during this study:

670 <http://cellimagelibrary.org/groups/50813>

671 <http://cellimagelibrary.org/images/50818>

672 <http://cellimagelibrary.org/groups/50832>

673 <http://cellimagelibrary.org/groups/50841>

674 <http://cellimagelibrary.org/groups/50849>

675 <http://cellimagelibrary.org/groups/50873>

676 <http://cellimagelibrary.org/images/50882>

677 <http://cellimagelibrary.org/images/50888>

678 <http://cellimagelibrary.org/images/50900>

679 <http://cellimagelibrary.org/groups/50906>

680 <http://cellimagelibrary.org/images/50920>

681 <http://cellimagelibrary.org/groups/50935>

682 <http://cellimagelibrary.org/images/50945>

### 683 **Summarized protocols**

684 Please refer to supplementary table 5 for a summarized information on thin sections, tomography  
685 samples and immuno-EM samples preparation.

686

687

688

689

690

### 691 **Acknowledgments**

692

693 This project was funded by the Swedish Research Council Grant (2015-00560) and the Knut and  
694 Alice Wallenberg Foundation (grant KAW 2012.0284, KAW 2014.0275) to RN, the Swedish  
695 Research Council Grants (621-2014-4597, 2018-03577) to MJT, the Swedish Research Council  
696 Young Investigator Grant (2015-05427), the Austrian Science Fund (J4342-B21) to VK and  
697 Swedish Research Council grant (2019-04004) to JLH and Knut and Alice Wallenberg grant  
698 (KAW 2017.0091) to TN and JLH.

699 All authors would like to thank Marc Pilon for providing the *C. elegans* worms and for contributing  
700 intellectually to the manuscript writing. Further on, we would like to thank Rebecca Andersson for  
701 her help in conducting the hydrogen peroxide experiment and Per Widlund for reagents. We  
702 would also like to thank Claes Andreasson, Per Widlund and Martin Ott for helpful discussions.

703

704

705

706

707

708

### 707 **References**

- 709 1. M. L. Watson, Pores in the mammalian nuclear membrane. *Biochim Biophys Acta* **15**, 475-  
710 479 (1954).
- 711 2. G. Kabachinski, T. U. Schwartz, The nuclear pore complex – structure and function at a  
712 glance. *Journal of Cell Science* **128**, 423-429 (2015).

- 713 3. M. Beck, E. Hurt, The nuclear pore complex: understanding its function through structural  
714 insight. *Nature Reviews Molecular Cell Biology* **18**, 73-89 (2017).
- 715 4. Y. M. Chook, G. Blobel, Karyopherins and nuclear import. *Curr Opin Struct Biol* **11**, 703-  
716 715 (2001).
- 717 5. A. Hoelz, E. W. Debler, G. Blobel, The Structure of the Nuclear Pore Complex. *Annual*  
718 *Review of Biochemistry* **80**, 613-643 (2011).
- 719 6. H. B. Schmidt, D. Görlich, Transport Selectivity of Nuclear Pores, Phase Separation, and  
720 Membraneless Organelles. *Trends in Biochemical Sciences* **41**, 46-61 (2016).
- 721 7. J. Garcia-Bustos, J. Heitman, M. N. Hall, Nuclear protein localization. *Biochimica et*  
722 *Biophysica Acta (BBA) - Reviews on Biomembranes* **1071**, 83-101 (1991).
- 723 8. L. J. Terry, E. B. Shows, S. R. Wentz, Crossing the Nuclear Envelope: Hierarchical  
724 Regulation of Nucleocytoplasmic Transport. *Science* **318**, 1412-1416 (2007).
- 725 9. A. Kohler, E. Hurt, Exporting RNA from the nucleus to the cytoplasm. *Nat Rev Mol Cell Biol*  
726 **8**, 761-773 (2007).
- 727 10. J. Schwartz, B. Roizman, Concerning the egress of herpes simplex virus from infected cells:  
728 electron and light microscope observations. *Virology* **38**, 42-49 (1969).
- 729 11. C. Hagen *et al.*, Structural Basis of Vesicle Formation at the Inner Nuclear Membrane. *Cell*  
730 **163**, 1692-1701 (2015).
- 731 12. L. G. Fradkin, V. Budnik, This bud's for you: mechanisms of cellular nucleocytoplasmic  
732 trafficking via nuclear envelope budding. *Curr Opin Cell Biol* **41**, 125-131 (2016).
- 733 13. I. H. Wang, C. J. Burckhardt, A. Yakimovich, U. F. Greber, Imaging, Tracking and  
734 Computational Analyses of Virus Entry and Egress with the Cytoskeleton. *Viruses* **10**  
735 (2018).
- 736 14. A. C. Longwell, G. Yerganian, SOME OBSERVATIONS ON NUCLEAR BUDDING AND  
737 NUCLEAR EXTRUSIONS IN A CHINESE HAMSTER CELL CULTURE. *J Natl Cancer Inst* **34**, 53-  
738 69 (1965).
- 739 15. R. N. Elston, B. Stenkvis, Quantitative estimation of nuclear buds and micronuclei in  
740 bovine cells transformed by Rous sarcoma and SV 40 viruses. *Zeitschrift für Zellforschung*  
741 *und Mikroskopische Anatomie* **68**, 543-549 (1965).
- 742 16. R. Hadek, H. Swift, Nuclear extrusion and intracisternal inclusions in the rabbit blastocyst.  
743 *The Journal of cell biology* **13**, 445-451 (1962).
- 744 17. D. Szollosi, Extrusion of nucleoli from pronuclei of the rat. *The Journal of cell biology* **25**,  
745 545-562 (1965).
- 746 18. M. S. Szollosi, D. Szollosi, 'Blebbing' of the nuclear envelope of mouse zygotes, early  
747 embryos and hybrid cells. *J Cell Sci* **91 ( Pt 2)**, 257-267 (1988).
- 748 19. H. Gay, NUCLEO-CYTOPLASMIC RELATIONS IN SALIVARY-GLAND CELLS OF *Drosophila*.  
749 *Proceedings of the National Academy of Sciences* **41**, 370-375 (1955).
- 750 20. R. H. Mepham, G. R. Lane, Observations on the fine structure of developing microspores  
751 of *Tradescantia bracteata*. *Protoplasma* **70**, 1-20 (1970).
- 752 21. B. M. Gullvåg, Release of Nuclear Material During the Development of *Lycopodium*  
753 *Annotinum L.* Spores. *Grana* **10**, 31-34 (1970).
- 754 22. B. A. Afzelius, THE NUCLEUS OF *NOCTILUCA SCINTILLANS*: Aspects of Nucleocytoplasmic  
755 Exchanges and the Formation of Nuclear Membrane. *The Journal of cell biology* **19**, 229-  
756 238 (1963).

- 757 23. H. G. Dickinson, Nucleo-Cytoplasmic Interaction following Meiosis in the Young  
758 Microspores of *Lilium Longiflorum*; Events at the Nuclear Envelope. *Grana* **11**, 117-127  
759 (1971).
- 760 24. H. G. Dickinson, P. R. Bell, Nucleocytoplasmic interaction at the nuclear envelope in post  
761 meiotic microspores of *Pinus banksiana*. *J Ultrastruct Res* **33**, 356-359 (1970).
- 762 25. H. C. Aldrich, I. K. Vasil, Ultrastructure of the postmeiotic nuclear envelope in microspores  
763 of *Podocarpus macrophyllus*. *J Ultrastruct Res* **32**, 307-315 (1970).
- 764 26. M. Hochstrasser, J. W. Sedat, Three-dimensional organization of *Drosophila melanogaster*  
765 interphase nuclei. II. Chromosome spatial organization and gene regulation. *The Journal*  
766 *of cell biology* **104**, 1471-1483 (1987).
- 767 27. J. M. Verboon *et al.*, Wash and the wash regulatory complex function in nuclear envelope  
768 budding. *Journal of Cell Science* 10.1242/jcs.243576, jcs.243576 (2020).
- 769 28. S. D. Speese *et al.*, Nuclear envelope budding enables large ribonucleoprotein particle  
770 export during synaptic Wnt signaling. *Cell* **149**, 832-846 (2012).
- 771 29. N. LaMassa, C. Arenas-Mena, G. R. Phillips, Electron microscopic characterization of  
772 nuclear egress in the sea urchin gastrula. *J Morphol* **279**, 609-615 (2018).
- 773 30. E. M. Hatch, M. W. Hetzer, RNP export by nuclear envelope budding. *Cell* **149**, 733-735  
774 (2012).
- 775 31. V. Jokhi *et al.*, Torsin mediates primary envelopment of large ribonucleoprotein granules  
776 at the nuclear envelope. *Cell Rep* **3**, 988-995 (2013).
- 777 32. B. Ding, A. M. Mirza, J. Ashley, V. Budnik, M. Munson, Nuclear Export Through Nuclear  
778 Envelope Remodeling in *Saccharomyces cerevisiae*. *bioRxiv* 10.1101/224055,  
779 224055 (2017).
- 780 33. A. Rose, C. Schlieker, Alternative nuclear transport for cellular protein quality control.  
781 *Trends in cell biology* **22**, 509-514 (2012).
- 782 34. D. Oling, F. Eisele, K. Kvint, T. Nystrom, Opposing roles of Ubp3-dependent  
783 deubiquitination regulate replicative life span and heat resistance. *The EMBO journal* **33**,  
784 747-761 (2014).
- 785 35. N. Erjavec, L. Larsson, J. Grantham, T. Nystrom, Accelerated aging and failure to segregate  
786 damaged proteins in Sir2 mutants can be suppressed by overproducing the protein  
787 aggregation-remodeling factor Hsp104p. *Genes & development* **21**, 2410-2421 (2007).
- 788 36. T. Dubnikov, T. Ben-Gedalya, E. Cohen, Protein Quality Control in Health and Disease. *Cold*  
789 *Spring Harbor perspectives in biology* **9** (2017).
- 790 37. A. K. Basu, DNA Damage, Mutagenesis and Cancer. *Int J Mol Sci* **19**, 970 (2018).
- 791 38. E. Shor, C. A. Fox, J. R. Broach, The yeast environmental stress response regulates  
792 mutagenesis induced by proteotoxic stress. *PLoS genetics* **9**, e1003680 (2013).
- 793 39. Y. Shibata, R. I. Morimoto, How the nucleus copes with proteotoxic stress. *Current biology*  
794 *: CB* **24**, R463-474 (2014).
- 795 40. N. Panté, M. Kann, Nuclear Pore Complex Is Able to Transport Macromolecules with  
796 Diameters of ~39 nm. *Molecular biology of the cell* **13**, 425-434 (2002).
- 797 41. S. R. Wenté, M. P. Rout, The nuclear pore complex and nuclear transport. *Cold Spring*  
798 *Harbor perspectives in biology* **2**, a000562 (2010).
- 799 42. A. B. Mehrtash, M. Hochstrasser, Ubiquitin-dependent protein degradation at the  
800 endoplasmic reticulum and nuclear envelope. *Semin Cell Dev Biol* **93**, 111-124 (2019).

- 801 43. G. Mannhaupt, R. Schnell, V. Karpov, I. Vetter, H. Feldmann, Rpn4p acts as a transcription  
802 factor by binding to PACE, a nonamer box found upstream of 26S proteasomal and other  
803 genes in yeast. *FEBS Letters* **450**, 27-34 (1999).
- 804 44. B. A. Koch, H. Yu, Regulation of inner nuclear membrane associated protein degradation.  
805 *Nucleus* **10**, 169 - 180 (2019).
- 806 45. M. Deng, M. Hochstrasser, Spatially regulated ubiquitin ligation by an ER/nuclear  
807 membrane ligase. *Nature* **443**, 827-831 (2006).
- 808 46. M. Boban, M. Pantazopoulou, A. Schick, P. O. Ljungdahl, R. Foisner, A nuclear ubiquitin-  
809 proteasome pathway targets the inner nuclear membrane protein Asi2 for degradation. *J*  
810 *Cell Sci* **127**, 3603-3613 (2014).
- 811 47. O. Foresti, V. Rodriguez-Vaello, C. Funaya, P. Carvalho, Quality control of inner nuclear  
812 membrane proteins by the Asi complex. *Science* **346**, 751-755 (2014).
- 813 48. J. O'Driscoll, D. Clare, H. Saibil, Prion aggregate structure in yeast cells is determined by  
814 the Hsp104-Hsp110 disaggregase machinery. *The Journal of cell biology* **211**, 145-158  
815 (2015).
- 816 49. P. Roberts *et al.*, Piecemeal microautophagy of nucleus in *Saccharomyces cerevisiae*.  
817 *Molecular biology of the cell* **14**, 129-141 (2003).
- 818 50. R. Lum, J. M. Tkach, E. Vierling, J. R. Glover, Evidence for an unfolding/threading  
819 mechanism for protein disaggregation by *Saccharomyces cerevisiae* Hsp104. *J Biol Chem*  
820 **279**, 29139-29146 (2004).
- 821 51. S. A. Comyn, B. P. Young, C. J. Loewen, T. Mayor, Prefoldin Promotes Proteasomal  
822 Degradation of Cytosolic Proteins with Missense Mutations by Maintaining Substrate  
823 Solubility. *PLoS Genet* **12**, e1006184-e1006184 (2016).
- 824 52. J. L. Folch-Mallol, A. Garay-Arroyo, F. Lledias, A. A. Covarrubias Robles, [The stress  
825 response in the yeast *Saccharomyces cerevisiae*]. *Revista latinoamericana de*  
826 *microbiologia* **46**, 24-46 (2004).
- 827 53. M. C. Haigis, B. A. Yankner, The aging stress response. *Molecular cell* **40**, 333-344 (2010).
- 828 54. I. L. Rempel *et al.*, Age-dependent deterioration of nuclear pore assembly in mitotic cells  
829 decreases transport dynamics. *eLife* **8**, e48186 (2019).
- 830 55. R. Josefson, R. Andersson, T. Nystrom, How and why do toxic conformers of aberrant  
831 proteins accumulate during ageing? *Essays in biochemistry* **61**, 317-324 (2017).
- 832 56. T. Smeal, J. Claus, B. Kennedy, F. Cole, L. Guarente, Loss of transcriptional silencing causes  
833 sterility in old mother cells of *S. cerevisiae*. *Cell* **84**, 633-642 (1996).
- 834 57. T. Jacobson *et al.*, Arsenite interferes with protein folding and triggers formation of  
835 protein aggregates in yeast. *Journal of cell science* **125** (2012).
- 836 58. A. J. Weids, S. Ibstedt, M. J. Tamas, C. M. Grant, Distinct stress conditions result in  
837 aggregation of proteins with similar properties. *Scientific reports* **6**, 24554 (2016).
- 838 59. X.-C. Zeng *et al.*, Hsp70 dynamics in vivo: effect of heat shock and protein aggregation.  
839 *Journal of Cell Science* **117**, 4991-5000 (2004).
- 840 60. L. Fowden, M. H. Richmond, Replacement of proline by azetidine-2-carboxylic acid during  
841 biosynthesis of protein. *Biochimica et Biophysica Acta* **71**, 459-461 (1963).
- 842 61. E. W. Trotter *et al.*, Misfolded proteins are competent to mediate a subset of the  
843 responses to heat shock in *Saccharomyces cerevisiae*. *The Journal of biological chemistry*  
844 **277**, 44817-44825 (2002).



- 845 62. S. J. S. Berke, H. L. Paulson, Protein aggregation and the ubiquitin proteasome pathway:  
846 gaining the UPPer hand on neurodegeneration. *Current Opinion in Genetics &*  
847 *Development* **13**, 253-261 (2003).
- 848 63. P. K. Kim, D. W. Hailey, R. T. Mullen, J. Lippincott-Schwartz, Ubiquitin signals autophagic  
849 degradation of cytosolic proteins and peroxisomes. *Proceedings of the National Academy*  
850 *of Sciences* **105**, 20567-20574 (2008).
- 851 64. S. Pankiv *et al.*, p62/SQSTM1 binds directly to Atg8/LC3 to facilitate degradation of  
852 ubiquitinated protein aggregates by autophagy. *The Journal of biological chemistry* **282**,  
853 24131-24145 (2007).
- 854 65. G. Leppert *et al.*, Cloning by gene amplification of two loci conferring multiple drug  
855 resistance in *Saccharomyces*. *Genetics* **125**, 13-20 (1990).
- 856 66. G. A. Collins, T. A. Gomez, R. J. Deshaies, W. P. Tansey, Combined chemical and genetic  
857 approach to inhibit proteolysis by the proteasome. *Yeast* **27**, 965-974 (2010).
- 858 67. Y. Xie, A. Varshavsky, RPN4 is a ligand, substrate, and transcriptional regulator of the 26S  
859 proteasome: A negative feedback circuit. *Proceedings of the National Academy of*  
860 *Sciences* **98**, 3056-3061 (2001).
- 861 68. D. A. Parsell, A. S. Kowal, M. A. Singer, S. Lindquist, Protein disaggregation mediated by  
862 heat-shock protein Hsp104. *Nature* **372**, 475-478 (1994).
- 863 69. J. R. Glover, S. Lindquist, Hsp104, Hsp70, and Hsp40: a novel chaperone system that  
864 rescues previously aggregated proteins. *Cell* **94**, 73-82 (1998).
- 865 70. J. M. Tkach, J. R. Glover, Nucleocytoplasmic trafficking of the molecular chaperone  
866 Hsp104 in unstressed and heat-shocked cells. *Traffic* **9**, 39-56 (2008).
- 867 71. G. M. Preston, C. J. Guerriero, M. B. Metzger, S. Michaelis, J. L. Brodsky, Substrate  
868 Insolubility Dictates Hsp104-Dependent Endoplasmic-Reticulum-Associated Degradation.  
869 *Molecular cell* **70**, 242-253.e246 (2018).
- 870 72. D. J. Thaller, C. Patrick Lusk, Fantastic nuclear envelope herniations and where to find  
871 them. *Biochemical Society Transactions* **46**, 877-889 (2018).
- 872 73. S. R. Wenthe, G. Blobel, A temperature-sensitive NUP116 null mutant forms a nuclear  
873 envelope seal over the yeast nuclear pore complex thereby blocking nucleocytoplasmic  
874 traffic. *The Journal of cell biology* **123**, 275-284 (1993).
- 875 74. S. R. Wenthe, G. Blobel, NUP145 encodes a novel yeast glycine-leucine-phenylalanine-  
876 glycine (GLFG) nucleoporin required for nuclear envelope structure. *The Journal of cell*  
877 *biology* **125**, 955-969 (1994).
- 878 75. M. Allegretti *et al.*, In-cell architecture of the nuclear pore and snapshots of its turnover.  
879 *Nature* **586**, 796-800 (2020).
- 880 76. C.-W. Lee *et al.*, Selective autophagy degrades nuclear pore complexes. *Nature Cell*  
881 *Biology* **22**, 159-166 (2020).
- 882 77. S. Otsuka *et al.*, Nuclear pore assembly proceeds by an inside-out extrusion of the nuclear  
883 envelope. *eLife* **5** (2016).
- 884 78. M. Vietri, M. Radulovic, H. Stenmark, The many functions of ESCRTs. *Nature Reviews*  
885 *Molecular Cell Biology* **21**, 25-42 (2020).
- 886 79. D. J. Thaller *et al.*, An ESCRT-LEM protein surveillance system is poised to directly monitor  
887 the nuclear envelope and nuclear transport system. *eLife* **8**, e45284 (2019).
- 888 80. I. Liguori *et al.*, Oxidative stress, aging, and diseases. *Clin Interv Aging* **13**, 757-772 (2018).

- 889 81. A. von Mikecz, M. Chen, T. Rockel, A. Scharf, The nuclear ubiquitin-proteasome system:  
890 visualization of proteasomes, protein aggregates, and proteolysis in the cell nucleus.  
891 *Methods in molecular biology (Clifton, N.J.)* **463**, 191-202 (2008).
- 892 82. S. V. Nielsen, E. G. Poulsen, C. A. Rebula, R. Hartmann-Petersen, Protein quality control in  
893 the nucleus. *Biomolecules* **4**, 646-661 (2014).
- 894 83. R. Prasad, S. Kawaguchi, D. T. W. Ng, A Nucleus-based Quality Control Mechanism for  
895 Cytosolic Proteins. *Molecular biology of the cell* **21**, 2117-2127 (2010).
- 896 84. S. H. Park *et al.*, PolyQ proteins interfere with nuclear degradation of cytosolic proteins  
897 by sequestering the Sis1p chaperone. *Cell* **154**, 134-145 (2013).
- 898 85. S. Hirayama *et al.*, Nuclear export of ubiquitinated proteins via the UBIN-POST system.  
899 *Proceedings of the National Academy of Sciences* **115**, E4199-E4208 (2018).
- 900 86. Shige H. Yoshimura, M. Kumeta, K. Takeyasu, Structural Mechanism of Nuclear Transport  
901 Mediated by Importin  $\beta$  and Flexible Amphiphilic Proteins. *Structure* **22**, 1699-1710  
902 (2014).
- 903 87. S. Shaid, C. H. Brandts, H. Serve, I. Dikic, Ubiquitination and selective autophagy. *Cell*  
904 *Death Differ* **20**, 21-30 (2013).
- 905 88. R. F. Kalejta, T. Shenk, Proteasome-dependent, ubiquitin-independent degradation of the  
906 Rb family of tumor suppressors by the human cytomegalovirus pp71 protein. *Proceedings*  
907 *of the National Academy of Sciences* **100**, 3263-3268 (2003).
- 908 89. A. L. Yokom *et al.*, Spiral architecture of the Hsp104 disaggregase reveals the basis for  
909 polypeptide translocation. *Nature Structural & Molecular Biology* **23**, 830-837 (2016).
- 910 90. J. J. Scarcelli, C. A. Hodge, C. N. Cole, The yeast integral membrane protein Apq12  
911 potentially links membrane dynamics to assembly of nuclear pore complexes. *The Journal*  
912 *of cell biology* **178**, 799-812 (2007).
- 913 91. B. M. Webster *et al.*, Chm7 and Heh1 collaborate to link nuclear pore complex quality  
914 control with nuclear envelope sealing. *The EMBO journal* **35**, 2447-2467 (2016).
- 915 92. A. Aguzzi, T. O'Connor, Protein aggregation diseases: pathogenicity and therapeutic  
916 perspectives. *Nature Reviews Drug Discovery* **9**, 237-248 (2010).
- 917 93. J. H. Butterfield, D. Weiler, G. Dewald, G. J. Gleich, Establishment of an immature mast  
918 cell line from a patient with mast cell leukemia. *Leuk Res* **12**, 345-355 (1988).
- 919 94. D. Zabeo *et al.*, Exosomes purified from a single cell type have diverse morphology. *J*  
920 *Extracell Vesicles* **6**, 1329476 (2017).
- 921 95. H. Xiao *et al.*, Mast cell exosomes promote lung adenocarcinoma cell proliferation – role  
922 of KIT-stem cell factor signaling. *Cell Communication and Signaling* **12**, 64 (2014).
- 923 96. J. L. Höög, E. Gluenz, S. Vaughan, K. Gull, Ultrastructural investigation methods for  
924 *Trypanosoma brucei*. *Methods Cell Biol* **96**, 175-196 (2010).
- 925 97. J. L. Höög *et al.*, Modes of flagellar assembly in *Chlamydomonas reinhardtii* and  
926 *Trypanosoma brucei*. *eLife* **3**, e01479 (2014).
- 927 98. J. L. Höög *et al.*, 3D Architecture of the *Trypanosoma brucei* Flagella Connector, a Mobile  
928 Transmembrane Junction. *PLOS Neglected Tropical Diseases* **10**, e0004312 (2016).
- 929 99. J. L. Höög *et al.*, Organization of Interphase Microtubules in Fission Yeast Analyzed by  
930 Electron Tomography. *Developmental Cell* **12**, 349-361 (2007).
- 931 100. J. L. Höög, C. Antony, "Whole-Cell Investigation of Microtubule Cytoskeleton Architecture  
932 by Electron Tomography" in *Methods in Cell Biology*. (Academic Press, 2007), vol. 79, pp.  
933 145-167.

- 934 101. E. Svensk *et al.*, Caenorhabditis elegans PAQR-2 and IGLR-2 Protect against Glucose  
935 Toxicity by Modulating Membrane Lipid Composition. *PLoS genetics* **12**, e1005982 (2016).  
936 102. J. Sulston, J. Hodgkin, *Methods*, 1988 (1988).  
937 103. Sandra M. Hill *et al.*, Asymmetric Inheritance of Aggregated Proteins and Age Reset in  
938 Yeast Are Regulated by Vac17-Dependent Vacuolar Functions. *Cell Reports* **16**, 826-838  
939 (2016).  
940 104. W. K. Huh *et al.*, Global analysis of protein localization in budding yeast. *Nature* **425**, 686-  
941 691 (2003).  
942 105. R. D. Gietz, Yeast transformation by the LiAc/SS carrier DNA/PEG method. *Methods in*  
943 *molecular biology (Clifton, N.J.)* **1205**, 1-12 (2014).  
944 106. C. Janke *et al.*, A versatile toolbox for PCR-based tagging of yeast genes: new fluorescent  
945 proteins, more markers and promoter substitution cassettes. *Yeast* **21**, 947-962 (2004).  
946 107. P. Hawes, C. L. Netherton, M. Mueller, T. Wileman, P. Monaghan, Rapid freeze-  
947 substitution preserves membranes in high-pressure frozen tissue culture cells. *J Microsc*  
948 **226**, 182-189 (2007).  
949 108. J. L. Höög *et al.*, Electron tomography reveals a flared morphology on growing  
950 microtubule ends. *Journal of Cell Science* **124**, 693-698 (2011).  
951 109. J. L. Höög, S. M. Huisman, D. Brunner, C. Antony, Electron Tomography Reveals Novel  
952 Microtubule Lattice and Microtubule Organizing Centre Defects in +TIP Mutants. *PLOS*  
953 *ONE* **8**, e61698 (2013).  
954 110. E. S. Reynolds, The use of lead citrate at high pH as an electron-opaque stain in electron  
955 microscopy. *The Journal of cell biology* **17**, 208-212 (1963).  
956 111. D. N. Mastronarde, Automated electron microscope tomography using robust prediction  
957 of specimen movements. *Journal of Structural Biology* **152**, 36-51 (2005).  
958 112. J. R. Kremer, D. N. Mastronarde, J. R. McIntosh, Computer Visualization of Three-  
959 Dimensional Image Data Using IMOD. *Journal of Structural Biology* **116**, 71-76 (1996).  
960 113. K. Keuenhof *et al.*, Large Organellar Changes Occur during Mild Heat Shock in Yeast.  
961 *bioRxiv* 10.1101/2021.01.25.428102, 2021.2001.2025.428102 (2021).  
962 114. A. Aufschnaiter *et al.*, The Enzymatic Core of the Parkinson's Disease-Associated Protein  
963 LRRK2 Impairs Mitochondrial Biogenesis in Aging Yeast. *Frontiers in Molecular*  
964 *Neuroscience* **11** (2018).  
965 115. J. Schindelin *et al.*, Fiji: an open-source platform for biological-image analysis. *Nat*  
966 *Methods* **9**, 676-682 (2012).

## 967 **Figures and Tables**

968

969

970

971

972 **Figure 1. NEB increases in frequency during heat shock in *S. cerevisiae*.** (a) Percentage of  
973 nuclei exhibiting NEB (left axis, black bars) and EDC (right axis, grey bars) as a function of time  
974 after cells have been subjected to heat shock (38 °C, n=63-337). NEB peaked at a level of 10.3%  
975 after 30 minutes and EDC exhibited a stable plateau of about 81% between 15 and 45 minutes.  
976 (b) Thin section containing NEB and EDC in heat shocked *S. cerevisiae* cells. Black arrow  
977 indicates NEB event, where the outer nuclear membrane clearly protrudes outwards and a

978 particle resides within the perinuclear space. (c) Labeling density of gold particles between  
979 untreated and heat shocked cells (38 °C for 30 minutes) using an anti-GFP antibody. Both  
980 Hsp104-GFP and guk1-7-GFP were preferentially localized at the EDC areas compared to the  
981 rest of the nucleoplasm. (d) Labeling density of Hsp104 using an anti-Hsp104 antibody in wild  
982 type and *hsp104Δ* cells subjected to heat shock at 38 °C for 45 minutes. No gold particles were  
983 detected in the mutant strain showing the specificity of the antibodies. (e-g) Representative  
984 images and respective models of the immuno-stained samples quantified in c and d. Hsp104 and  
985 guk1-7 are significantly localized to the EDC area whereas only one gold is detected in the EDC  
986 of the *hsp104Δ* mutant. Scale bars: 300 nm (b) and 500 nm (e, f, g). Abbreviations: NEB, nuclear  
987 envelope budding; EDC, electron dense content; N, nucleus; V, vacuole; . \* $P < .05$ ,  
988 \*\* $P < .01$ , \*\*\* $P < .001$  vs. zero time point or control group; ns no significant differences between  
989 groups.

990

991 **Figure 2. Four different cellular stressors increase NEB frequency in *S. cerevisiae* cells.**

992 Thin sections containing NEB events in (a) old cells (b) cells subjected to oxidative stress with  
993 H<sub>2</sub>O<sub>2</sub> (c) cells exposed to sodium arsenite . (d) Percentage of nuclei containing NEB events in  
994 cells in each stress condition compared to control cultures grown under normal conditions.  
995 Young cells were also examined after separation from old cells and show an increase in NEB  
996 compared to the control, but to a lesser extent than old cells. Cells exposed to H<sub>2</sub>O<sub>2</sub> were grown  
997 in different media than the other cultures, and therefore were compared to a different control  
998 culture . n is equal to the number of examined sections. (e) Thin section containing a NEB event  
999 in cells treated with AZC, a chemical which causes proteotoxic stress. (f) Percentage of nuclei  
1000 containing NEB events before as well as 30 and 90 minutes after treatment with AZC . Cells  
1001 exhibited a higher percentage of NEB (22%) after 90 minutes of exposure to AZC than in any  
1002 other condition tested. All scale bars 200 nm. Abbreviations: NEB, nuclear envelope budding;  
1003 N, nucleus; black arrows indicate NEB events. \* $P < .05$ , \*\* $P < .01$ , \*\*\* $P < .001$  vs. control; ns no  
1004 significant differences between groups.

1005

1006 **Figure 3. Association of NEB pathway and protein quality control system..** (a) Immuno-gold  
1007 labeling with an anti-ubiquitin antibody (ab19247) was quantified as the amount of gold particles  
1008 per square micrometer for five different cellular structures. Lipid droplets (n=42) served as a  
1009 negative and autophagosomes (n=13) as a positive control. EDC (n=192) and NEB events  
1010 (n=12) exhibited an increase in labeling compared to lipid droplets and the nucleoplasm (n=42)  
1011 which was defined as area within the nucleus not containing EDC. (b) Thin sections labeled with  
1012 the anti-ubiquitin antibody ab19247. To the bottom of each micrograph a model is drawn to help  
1013 distinguish gold particles. Two labeled NEB events are shown in the first two panels and an EDC

1014 containing gold particles is shown in the third panel . **(c-e)** Proteasomal inhibition triggered a  
1015 significant increase in NEB events with 73% of them having a distinct electron dense appearance.  
1016 **(f-g)** Immuno-gold labeling of an anti-GFP antibody of an Hsp104-GFP strain was quantified as  
1017 the amount of gold particles per square micrometer. Lipid droplets (negative control; n=41) and  
1018 EDC (positive control; n=50). NEB events (n=10) exhibited an increase labeling density in  
1019 comparison to the negative control. All scale bars 200 nm. Abbreviations: NEB, nuclear  
1020 envelope budding; N, nucleoplasm; EDC; electron dense content; LD, lipid droplet; APS,  
1021 autophagosomes; white arrow indicates NEB.

1022

1023 **Figure 4. NEB structures are not misassembled NPCs.** Immuno-gold labeling, with the  
1024 Mab414 antibody which recognizes four different NPC proteins, was performed on thin sections  
1025 of cells grown under normal conditions **(a-c)** and old cells **(d)**. To the right of each micrograph, a  
1026 model is drawn to help distinguish the locations of gold particles. **(e)** Percentage of labeled NPCs  
1027 (positive control), lipid droplets (negative control) and NEB events are plotted. Data for  
1028 unstressed cells is shown in black, and for old cells in grey. Lipid droplets and NEB events were  
1029 rarely labeled in contrast to the highly labeled NPCs. **(f)** 25 nm thick slice of NEB in a  
1030 tomographic reconstruction of *S. cerevisiae*. Both nuclear membranes are clearly visible  
1031 surrounding a vesicle within the perinuclear space. In all slices of the tomogram, the membrane  
1032 of this vesicle is complete and not continuous with either nuclear membrane. **(g)** 3D model of the  
1033 NEB event contained in **f**. Nuclear membranes are presented in orange color and the transporting  
1034 material in pink. n is equal to the number of examined structures. Scale bars: 200 nm **(a-d)**, 100  
1035 nm **(f-g)**. Abbreviations: NEB, nuclear envelope budding; N, nucleus; LD, lipid droplet; APS,  
1036 autophagosomes; NPC, nuclear pore complex; black arrows indicate NEB events, asterisks  
1037 indicate NPCs. \* $P < .05$ , \*\*\* $P < .001$  vs. NPCs (positive control).

1038

1039 **Figure 5. The NEB pathway is part of normal cellular function from humans to protists.**  
1040 Thin sections containing nuclei were examined for the presence of NEB events in five different  
1041 organisms in wild type cells grown under normal conditions. **(a)** Percentage of nuclei containing  
1042 NEB events. NEB events were either outwards protruding (type 1), inwards protruding (type 2),  
1043 or did not protrude more in either direction but clearly contained a particle in the perinuclear  
1044 space (type 3). NEB was observed in **(b)** HMC-1 cells (n=122) **(c)** *C. elegans* (n=138) **(d)** *T.*  
1045 *brucei* (n=119) **(e)** *S. cerevisiae* (n=161) and **(f)** *S. pombe* (n=101) by electron microscopy. Scale  
1046 bars: 2  $\mu$ m **(b)**, 200 nm **(c, f)**, 500 nm **(d)**, and 300 nm **(e)**. Abbreviations: NEB, nuclear envelope  
1047 budding; HMC-1, human mast cell line 1; N, nucleus; black arrows indicate NEB events.

1048

1049 **Figure 6. 3D architecture of NEB events of *S. pombe* and *T. brucei* visualized with electron**  
1050 **tomography.** (a, d) 1.5 nm thick slices of *S. pombe* and *T. brucei* tomographical reconstructions  
1051 showing NEB events (black boxes). A second NEB event in *T. brucei*, not clearly visible in the  
1052 presented tomographic tilt, is located on the left lower part of the nucleus (dashed black box). (b,  
1053 e) 15 nm thick zoomed-in views of the NEB events in *S. pombe* and *T. brucei*. In *S. pombe* a lipid  
1054 bilayer is surrounding the transported material whereas in *T. brucei* the density is surrounded by  
1055 the nuclear membranes only. (g) Second NEB event of *T. brucei* (acquired at the tomographic tilt  
1056 that allowed best visualization of this NEB event). Electron dense particles are observed around  
1057 the neck of the bud (black arrow). (c, f, h) Reconstructed 3D models of the NEB events. Nuclear  
1058 membranes are presented in orange color and the transporting material in pink. Scale bars: 500  
1059 nm (a, d) and 100 nm (b-c, e-h). Abbreviations: NEB, nuclear envelope budding; N, nucleus;  
1060

1061 **Figure 7. Phylogenetic tree of the species where NEB events have previously been**  
1062 **observed.** The phylogenetic relationships between the species are presented as a horizontal  
1063 cladogram with the root to the left. Species indicated with blue color are from this study.  
1064 References presented from 1 to 13 respectively: (17), (18), (14), (16), (15), (29), (19, 26, 28),  
1065 (25), (21), (20), (23), (24), (22). All sketches are drawn by the author and are not subject to  
1066 copyright protection.

**Figure 1**

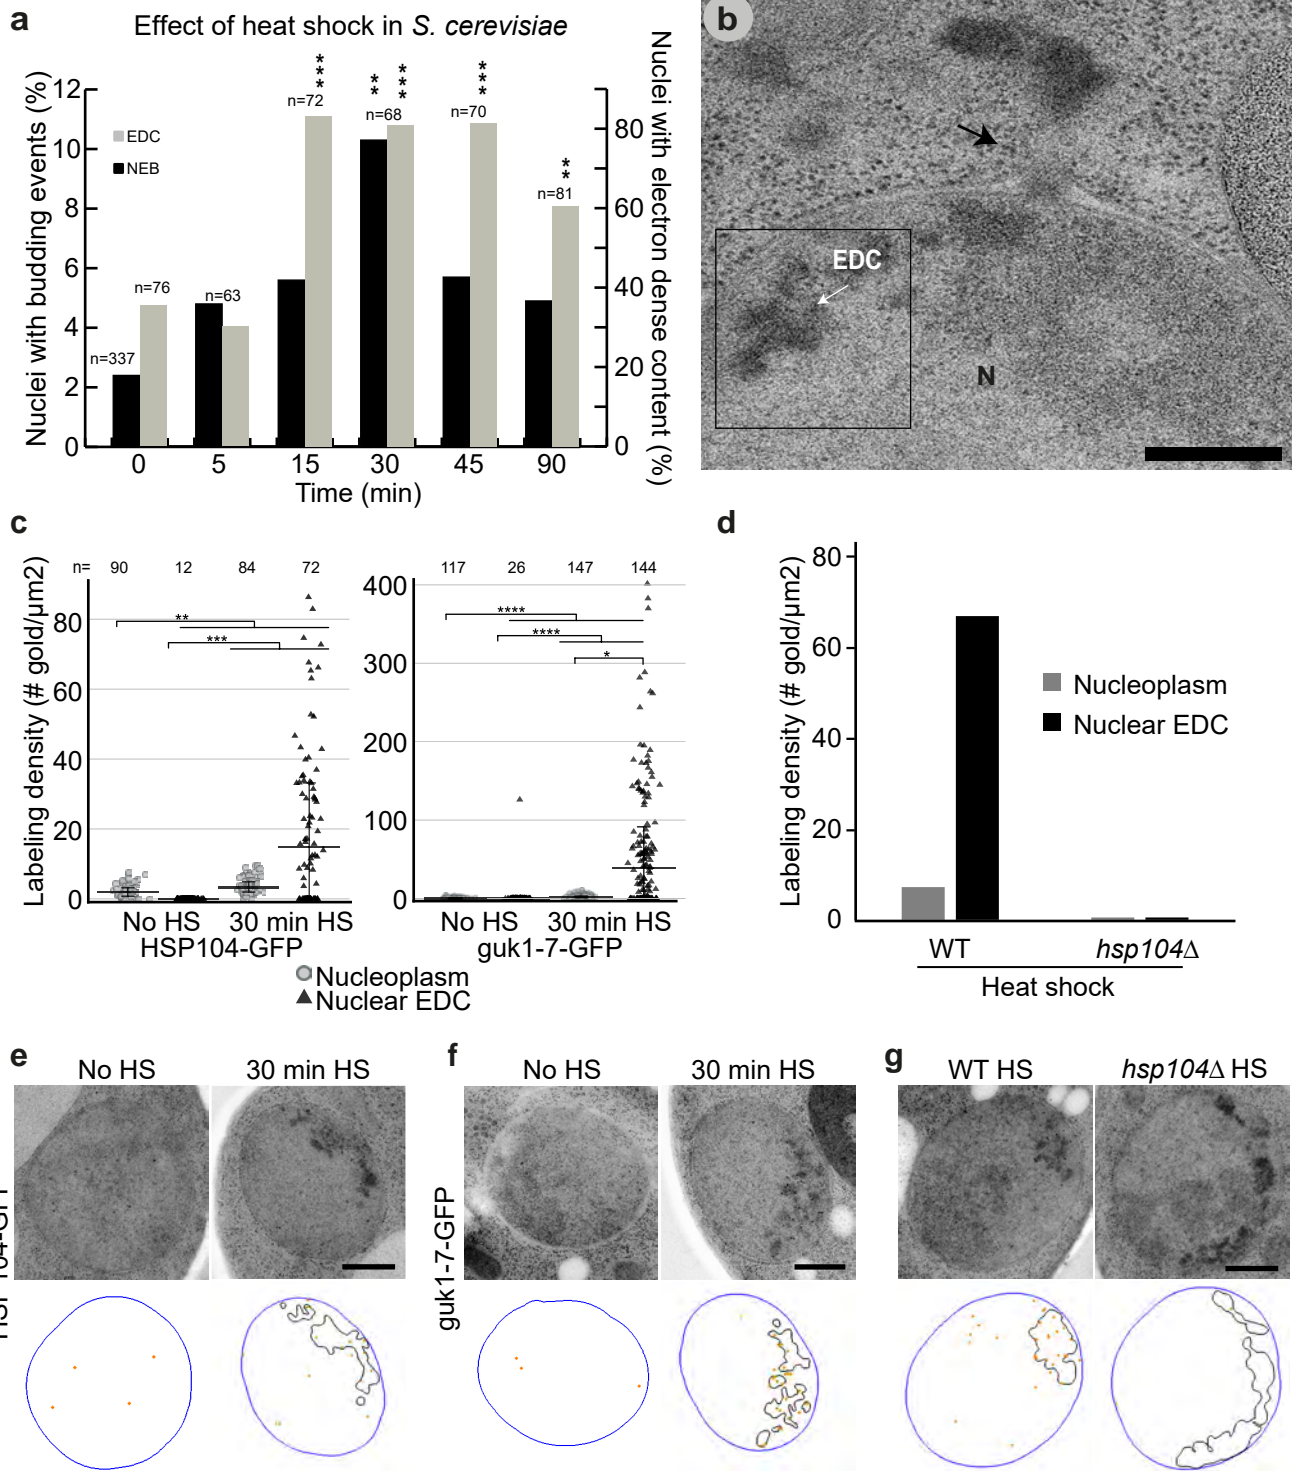

**Figure 2**

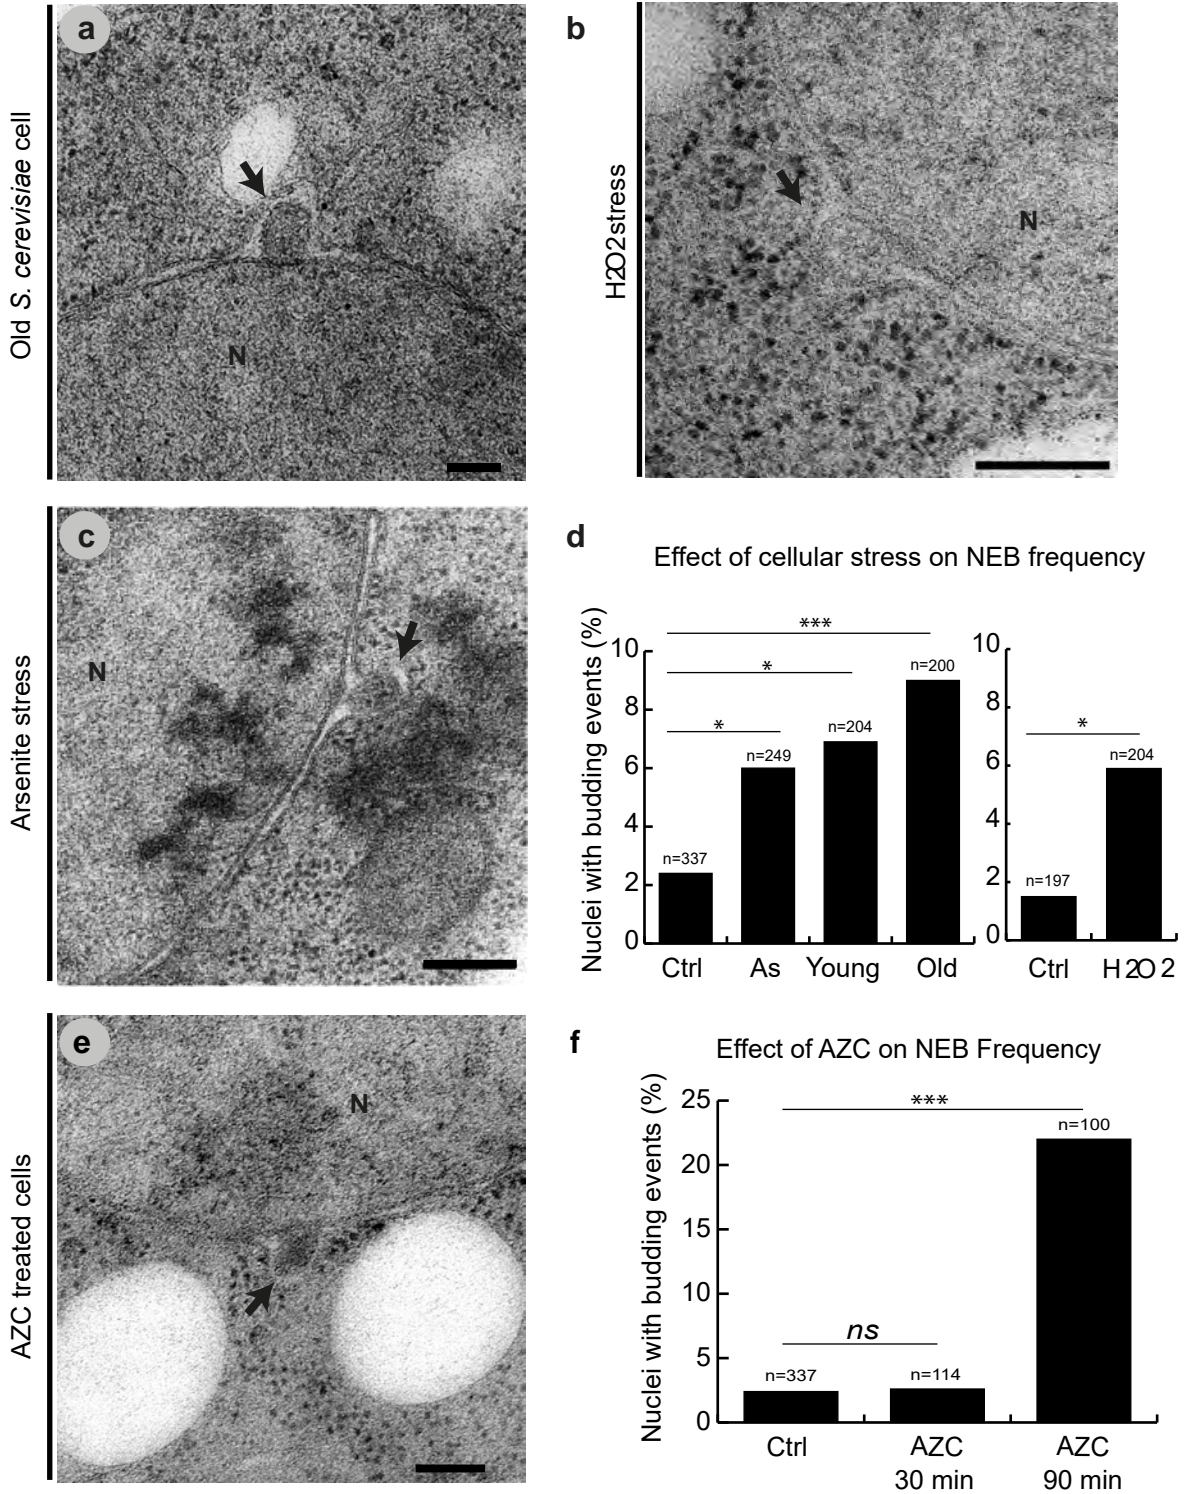



**Figure 3**

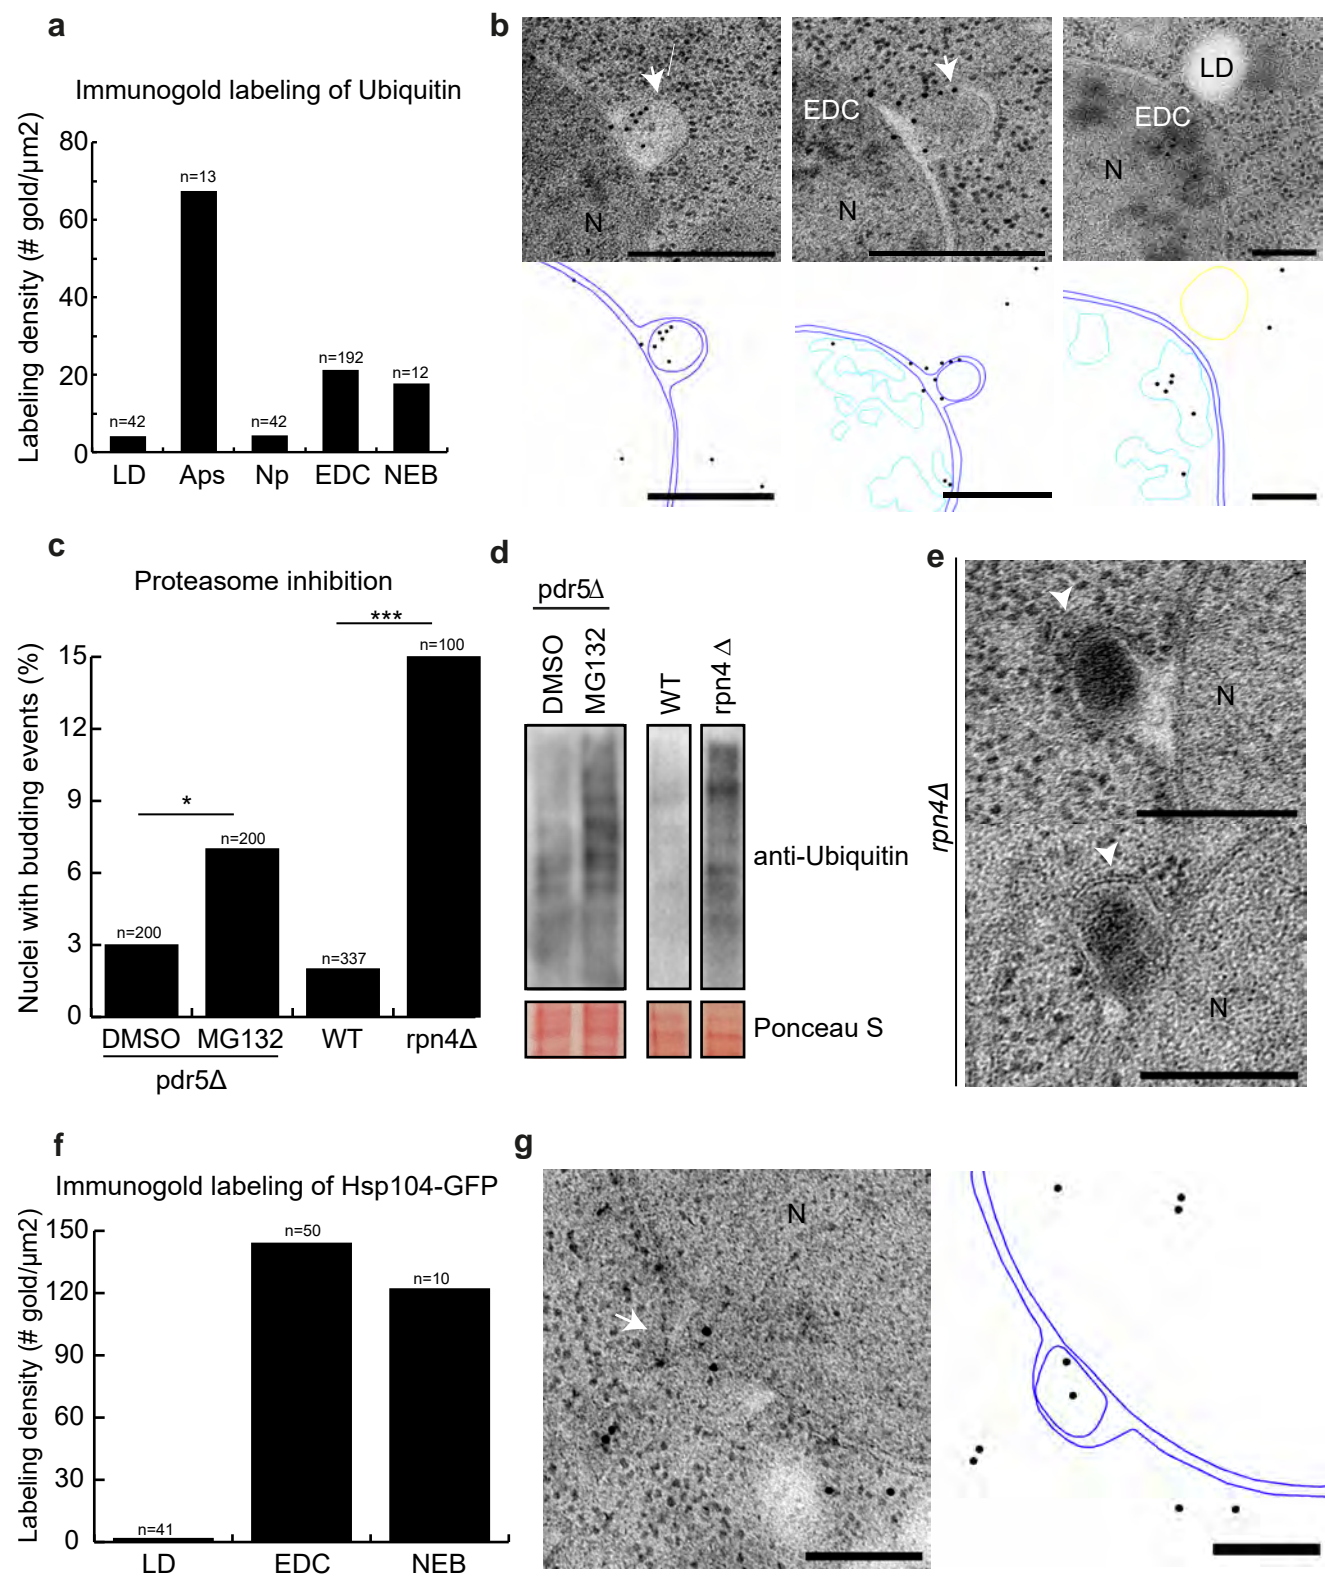

**Figure 4**

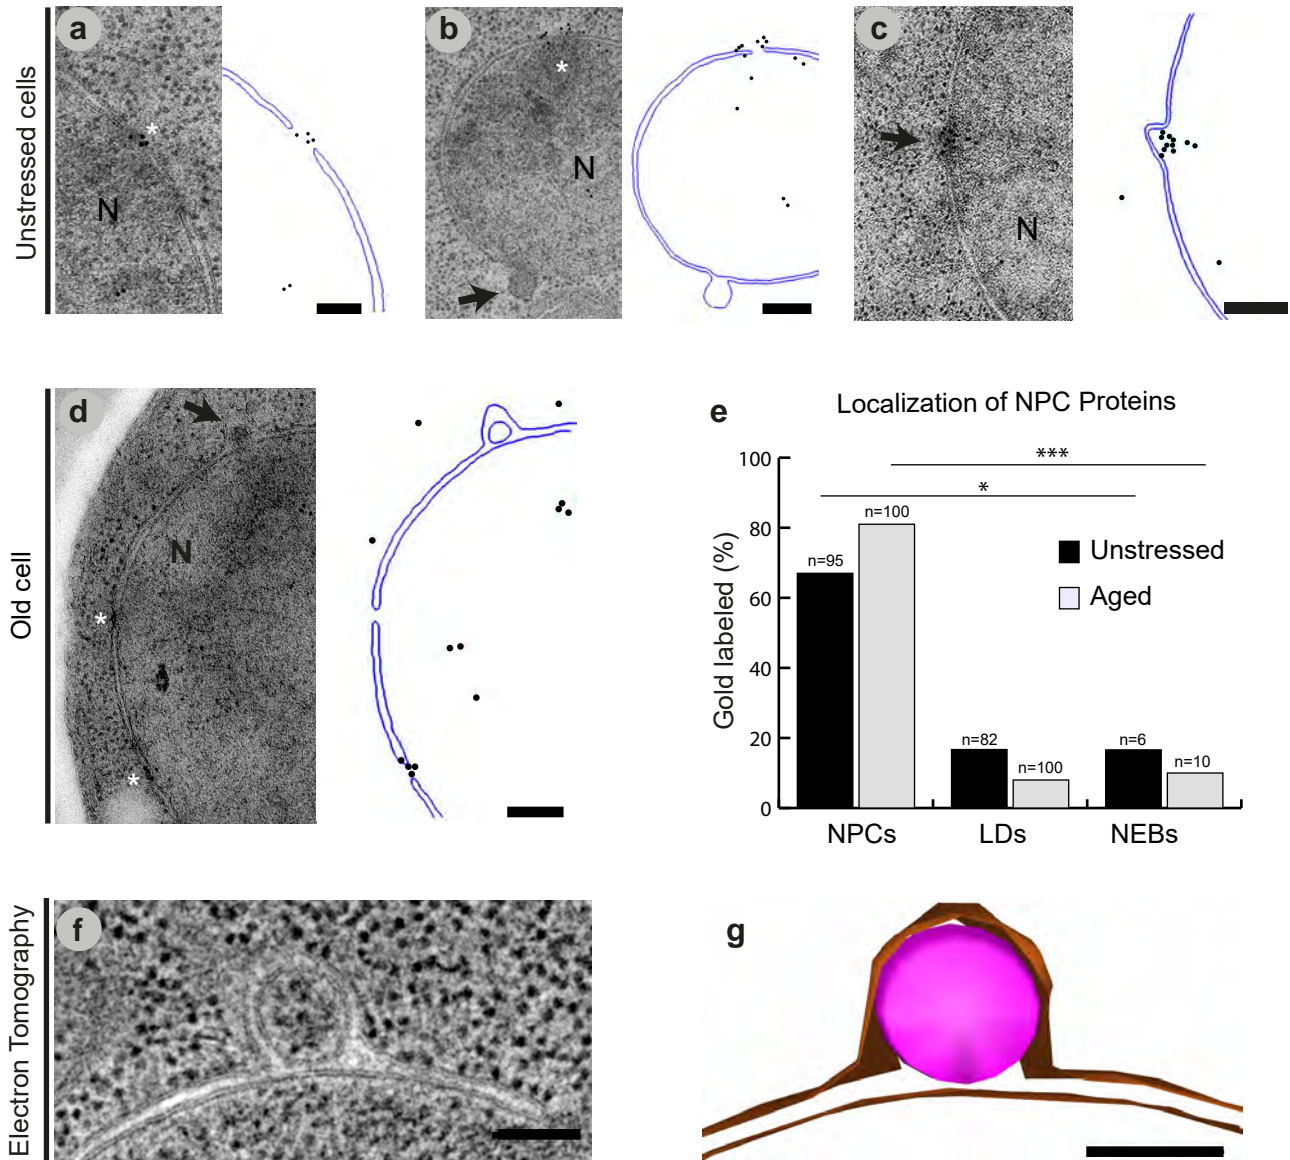

**Figure 5**

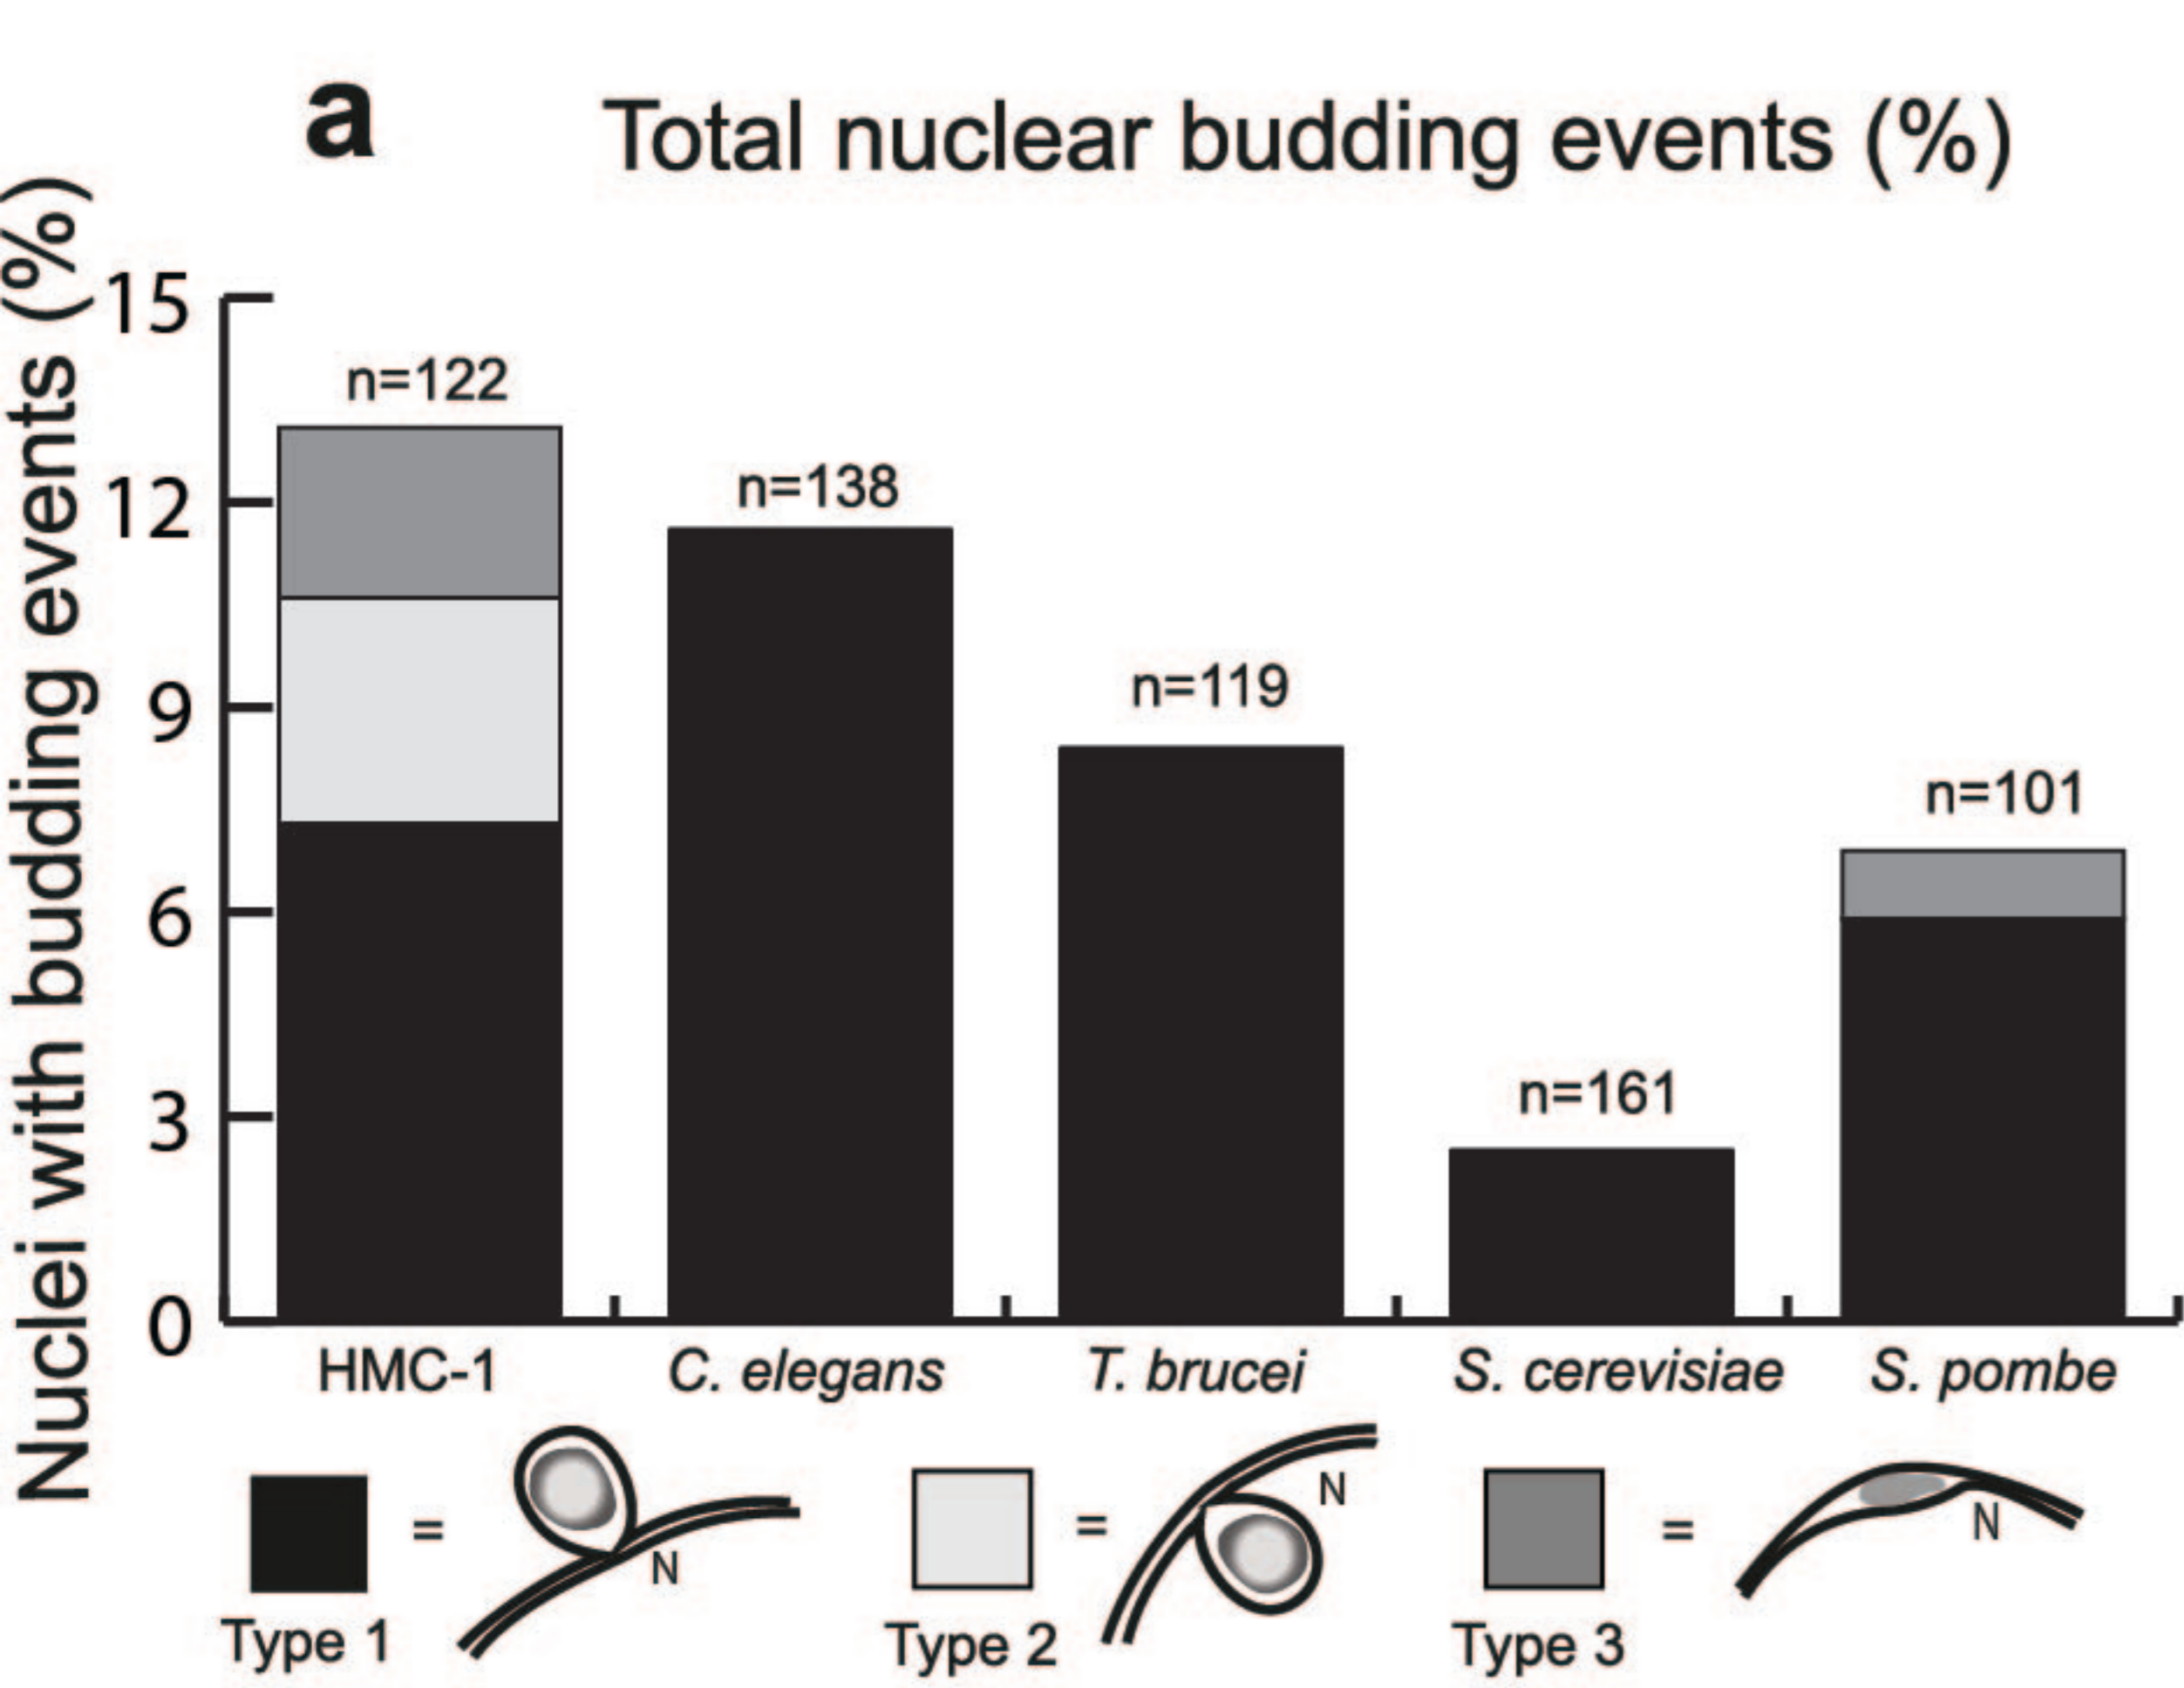

HMC-1

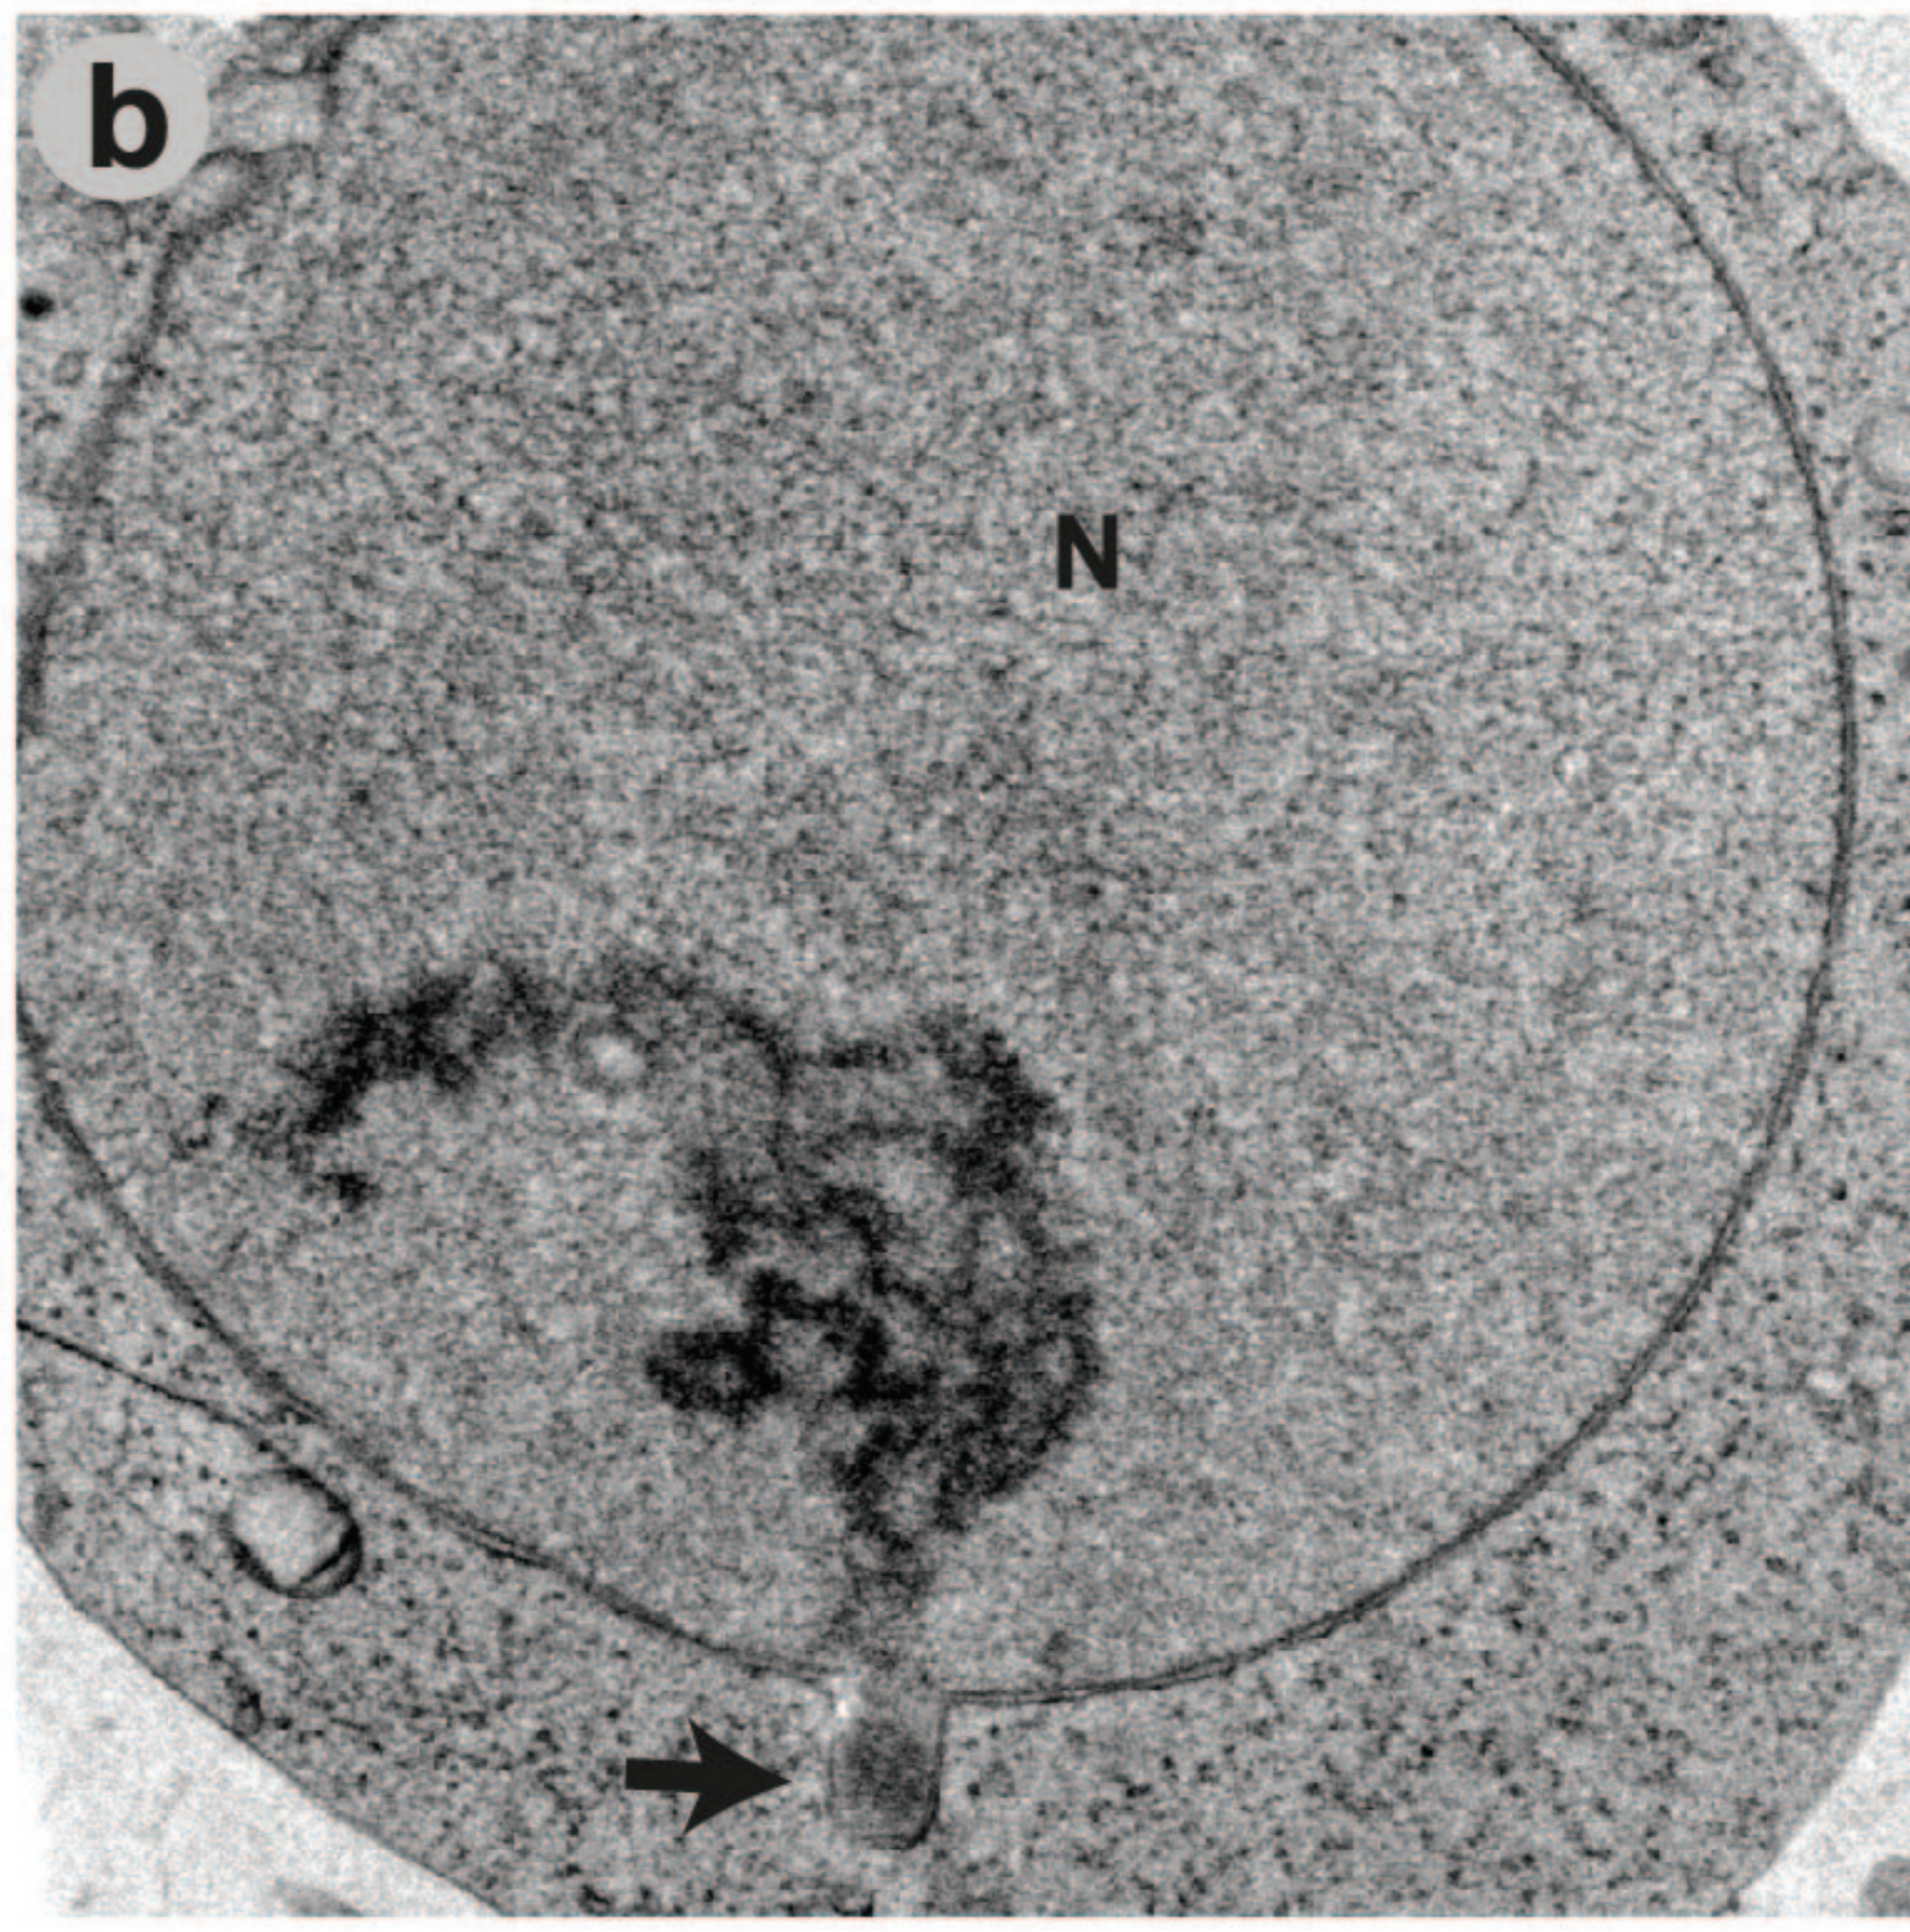

*Caenorhabditis elegans*

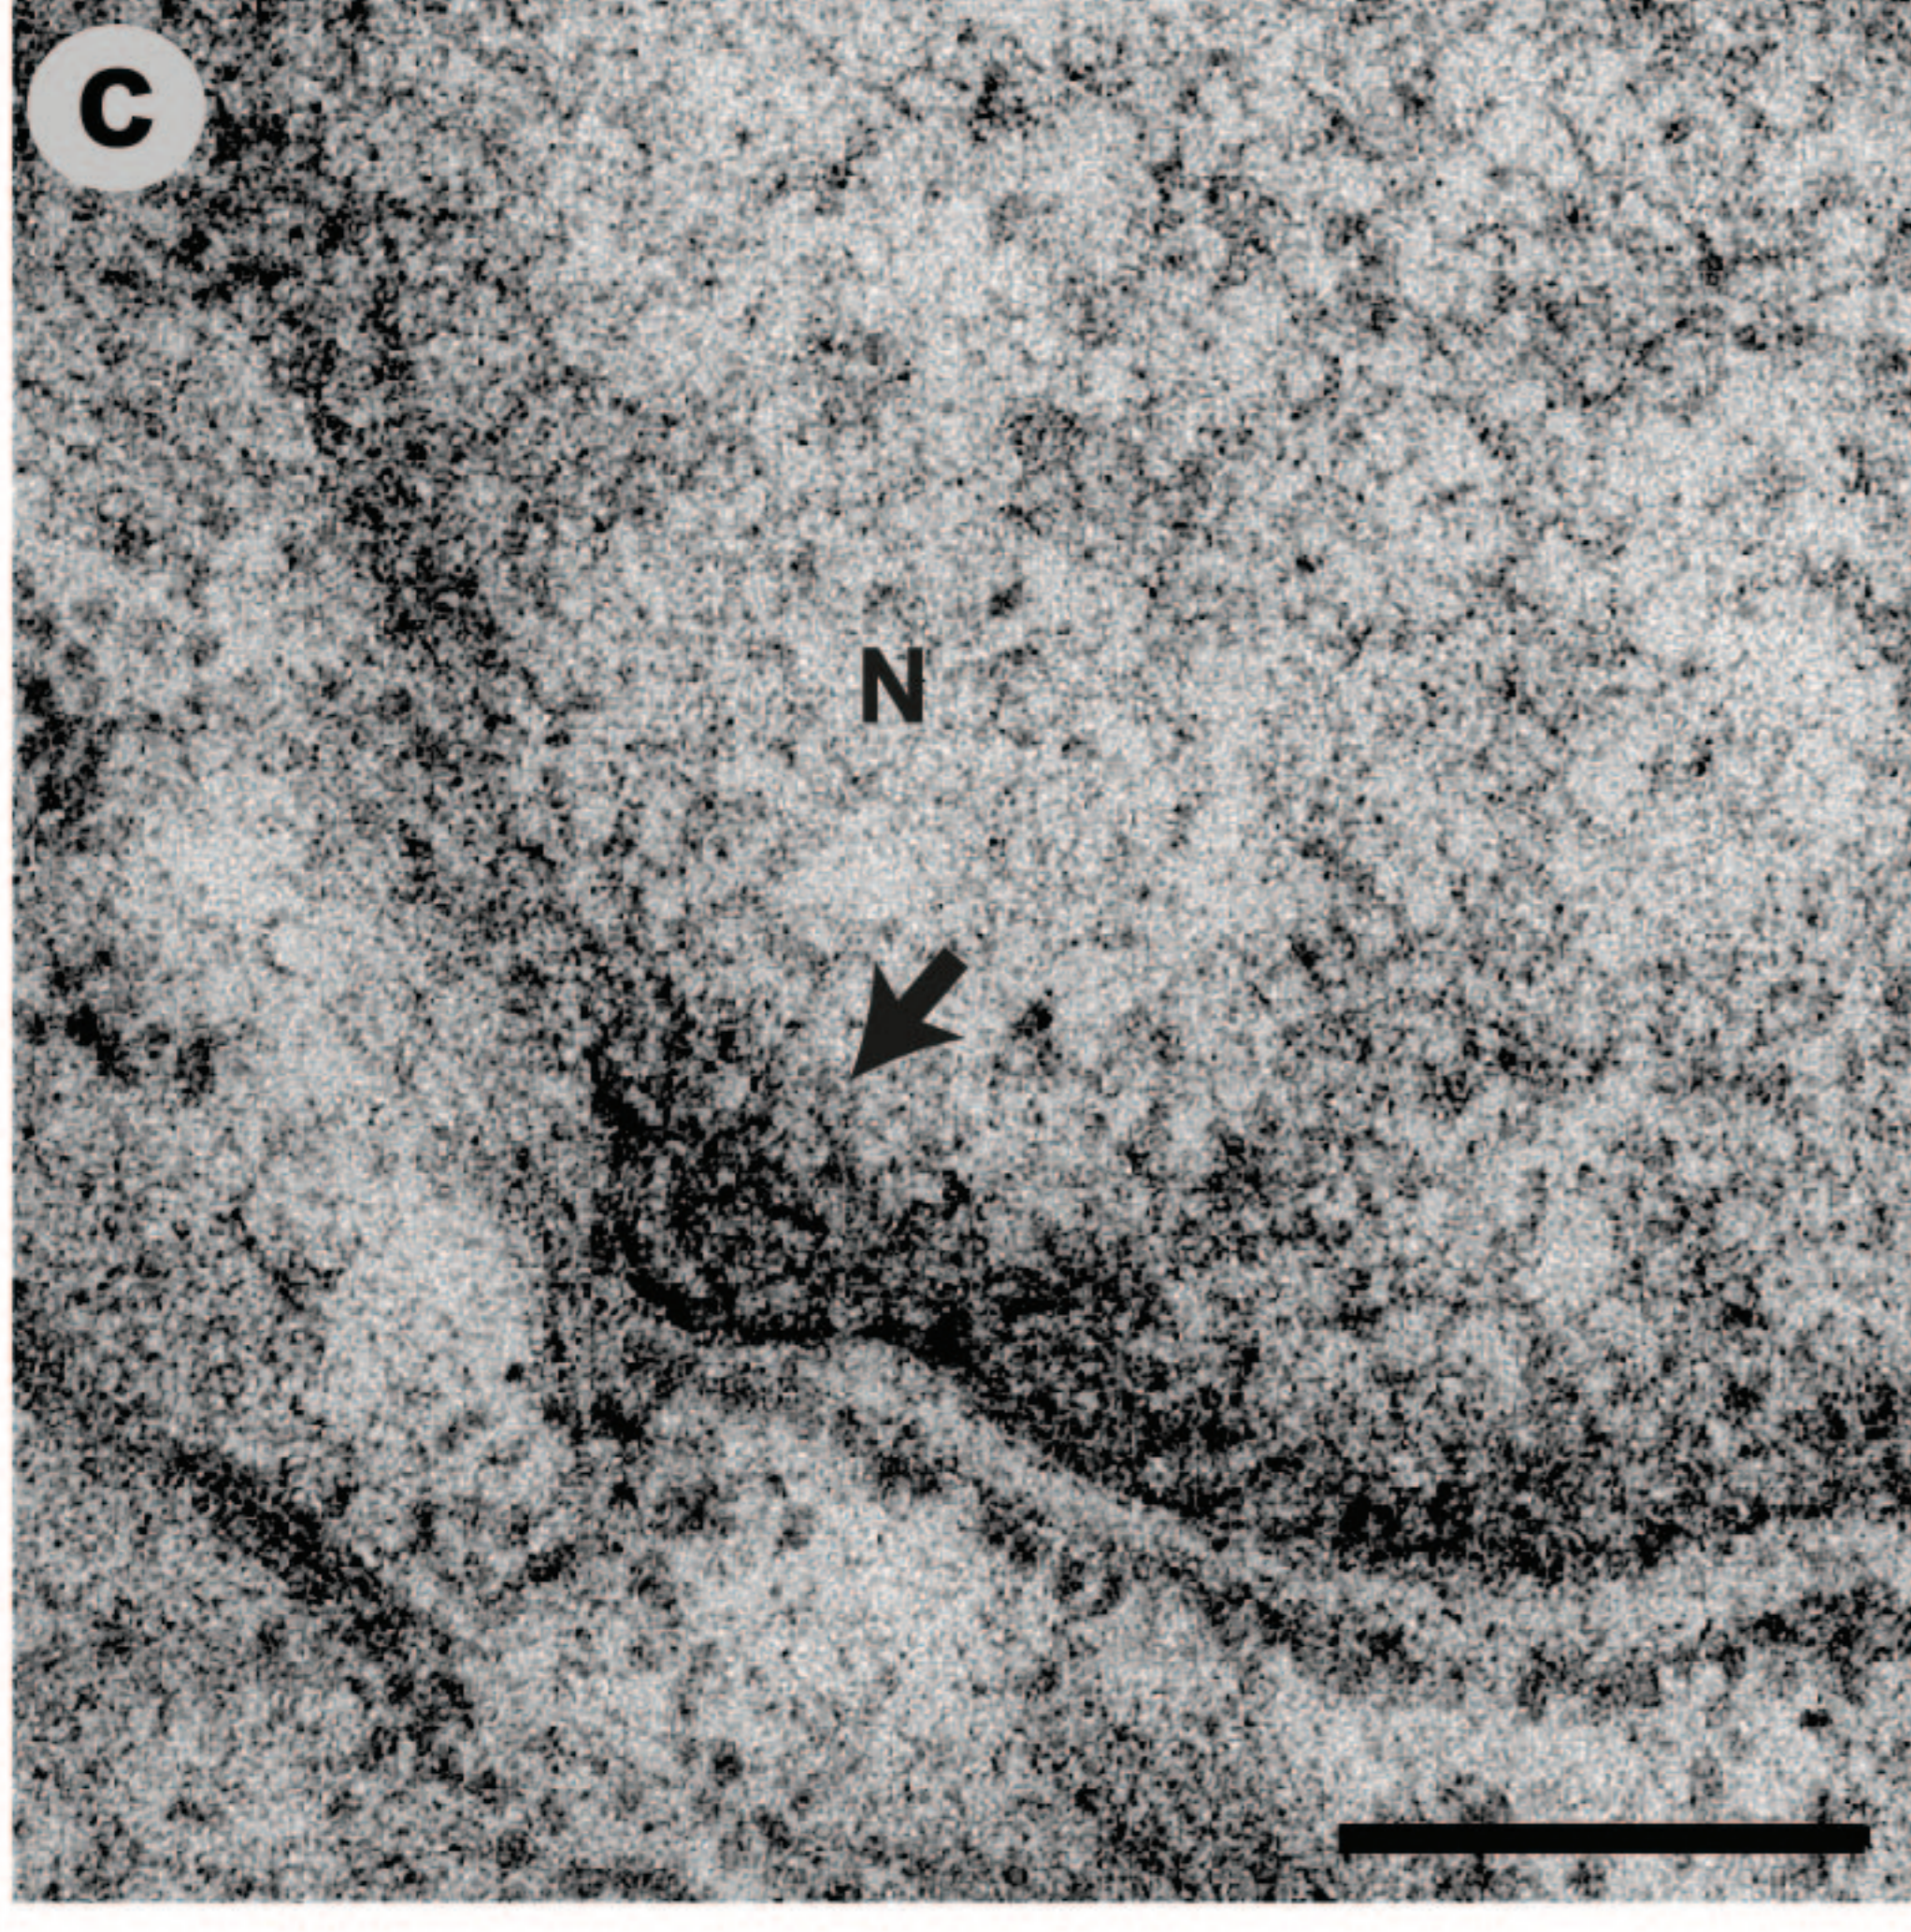

*Trypanosoma brucei*

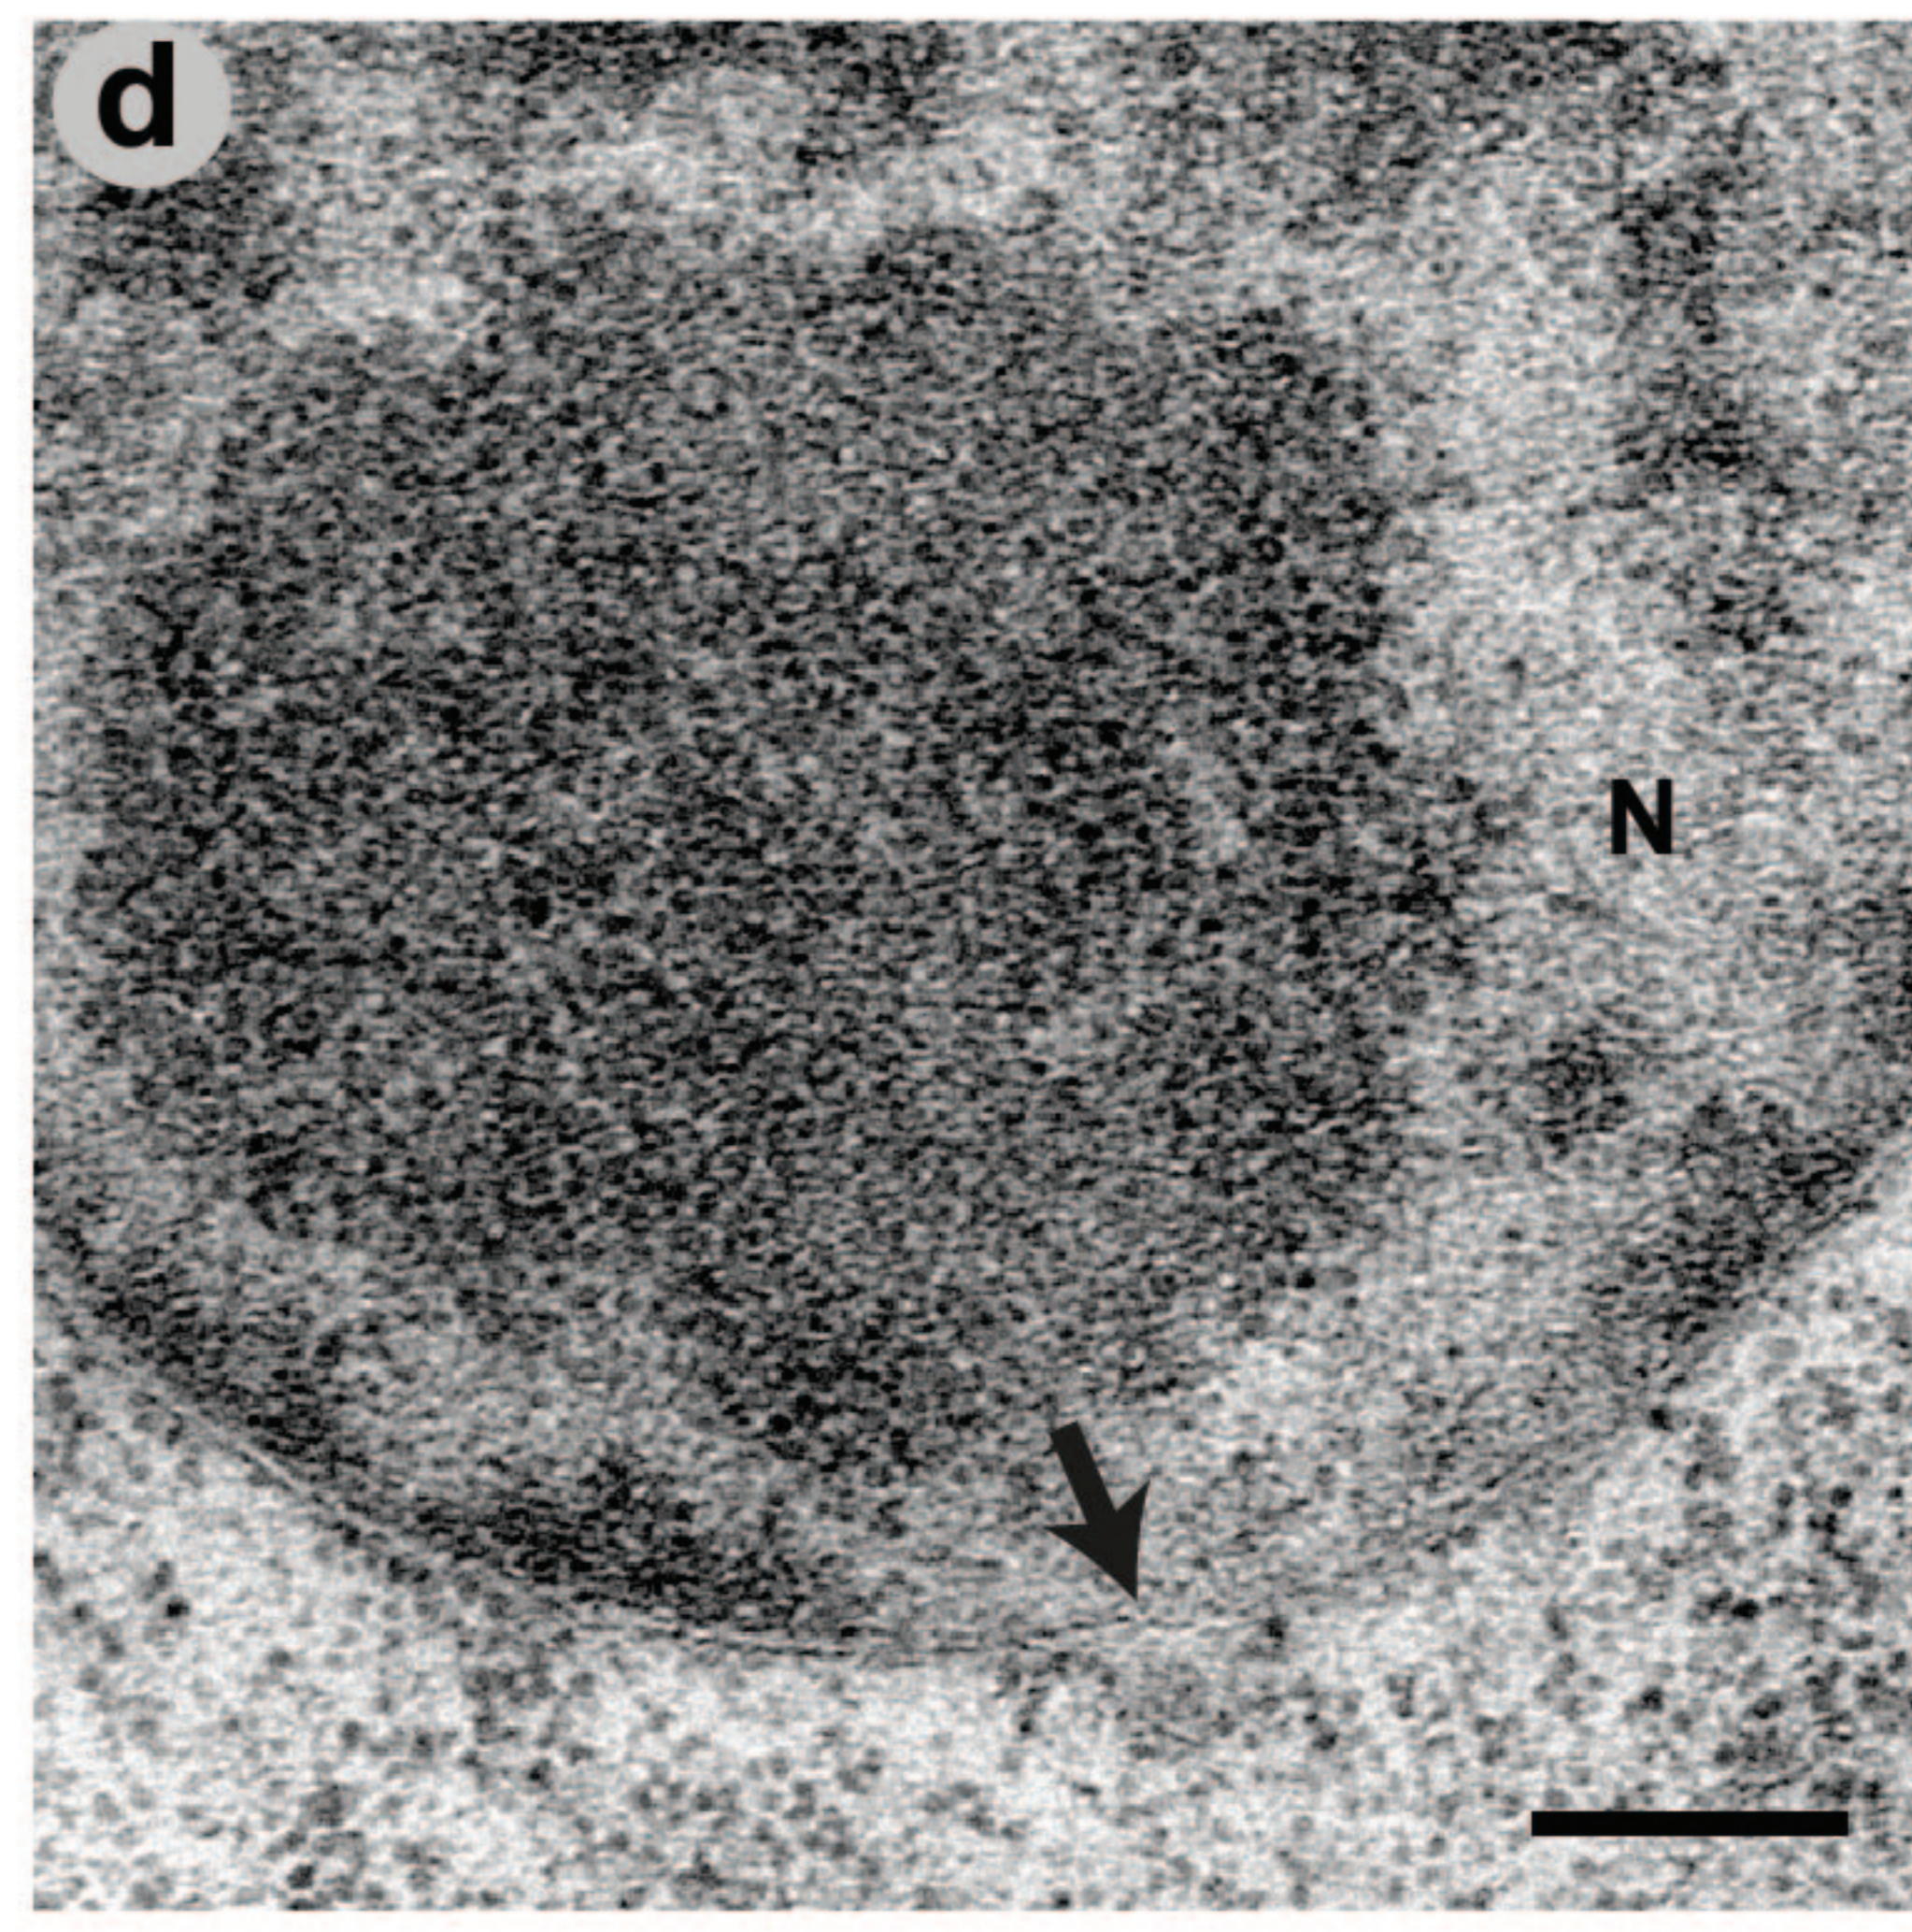

*Saccharomyces cerevisiae*

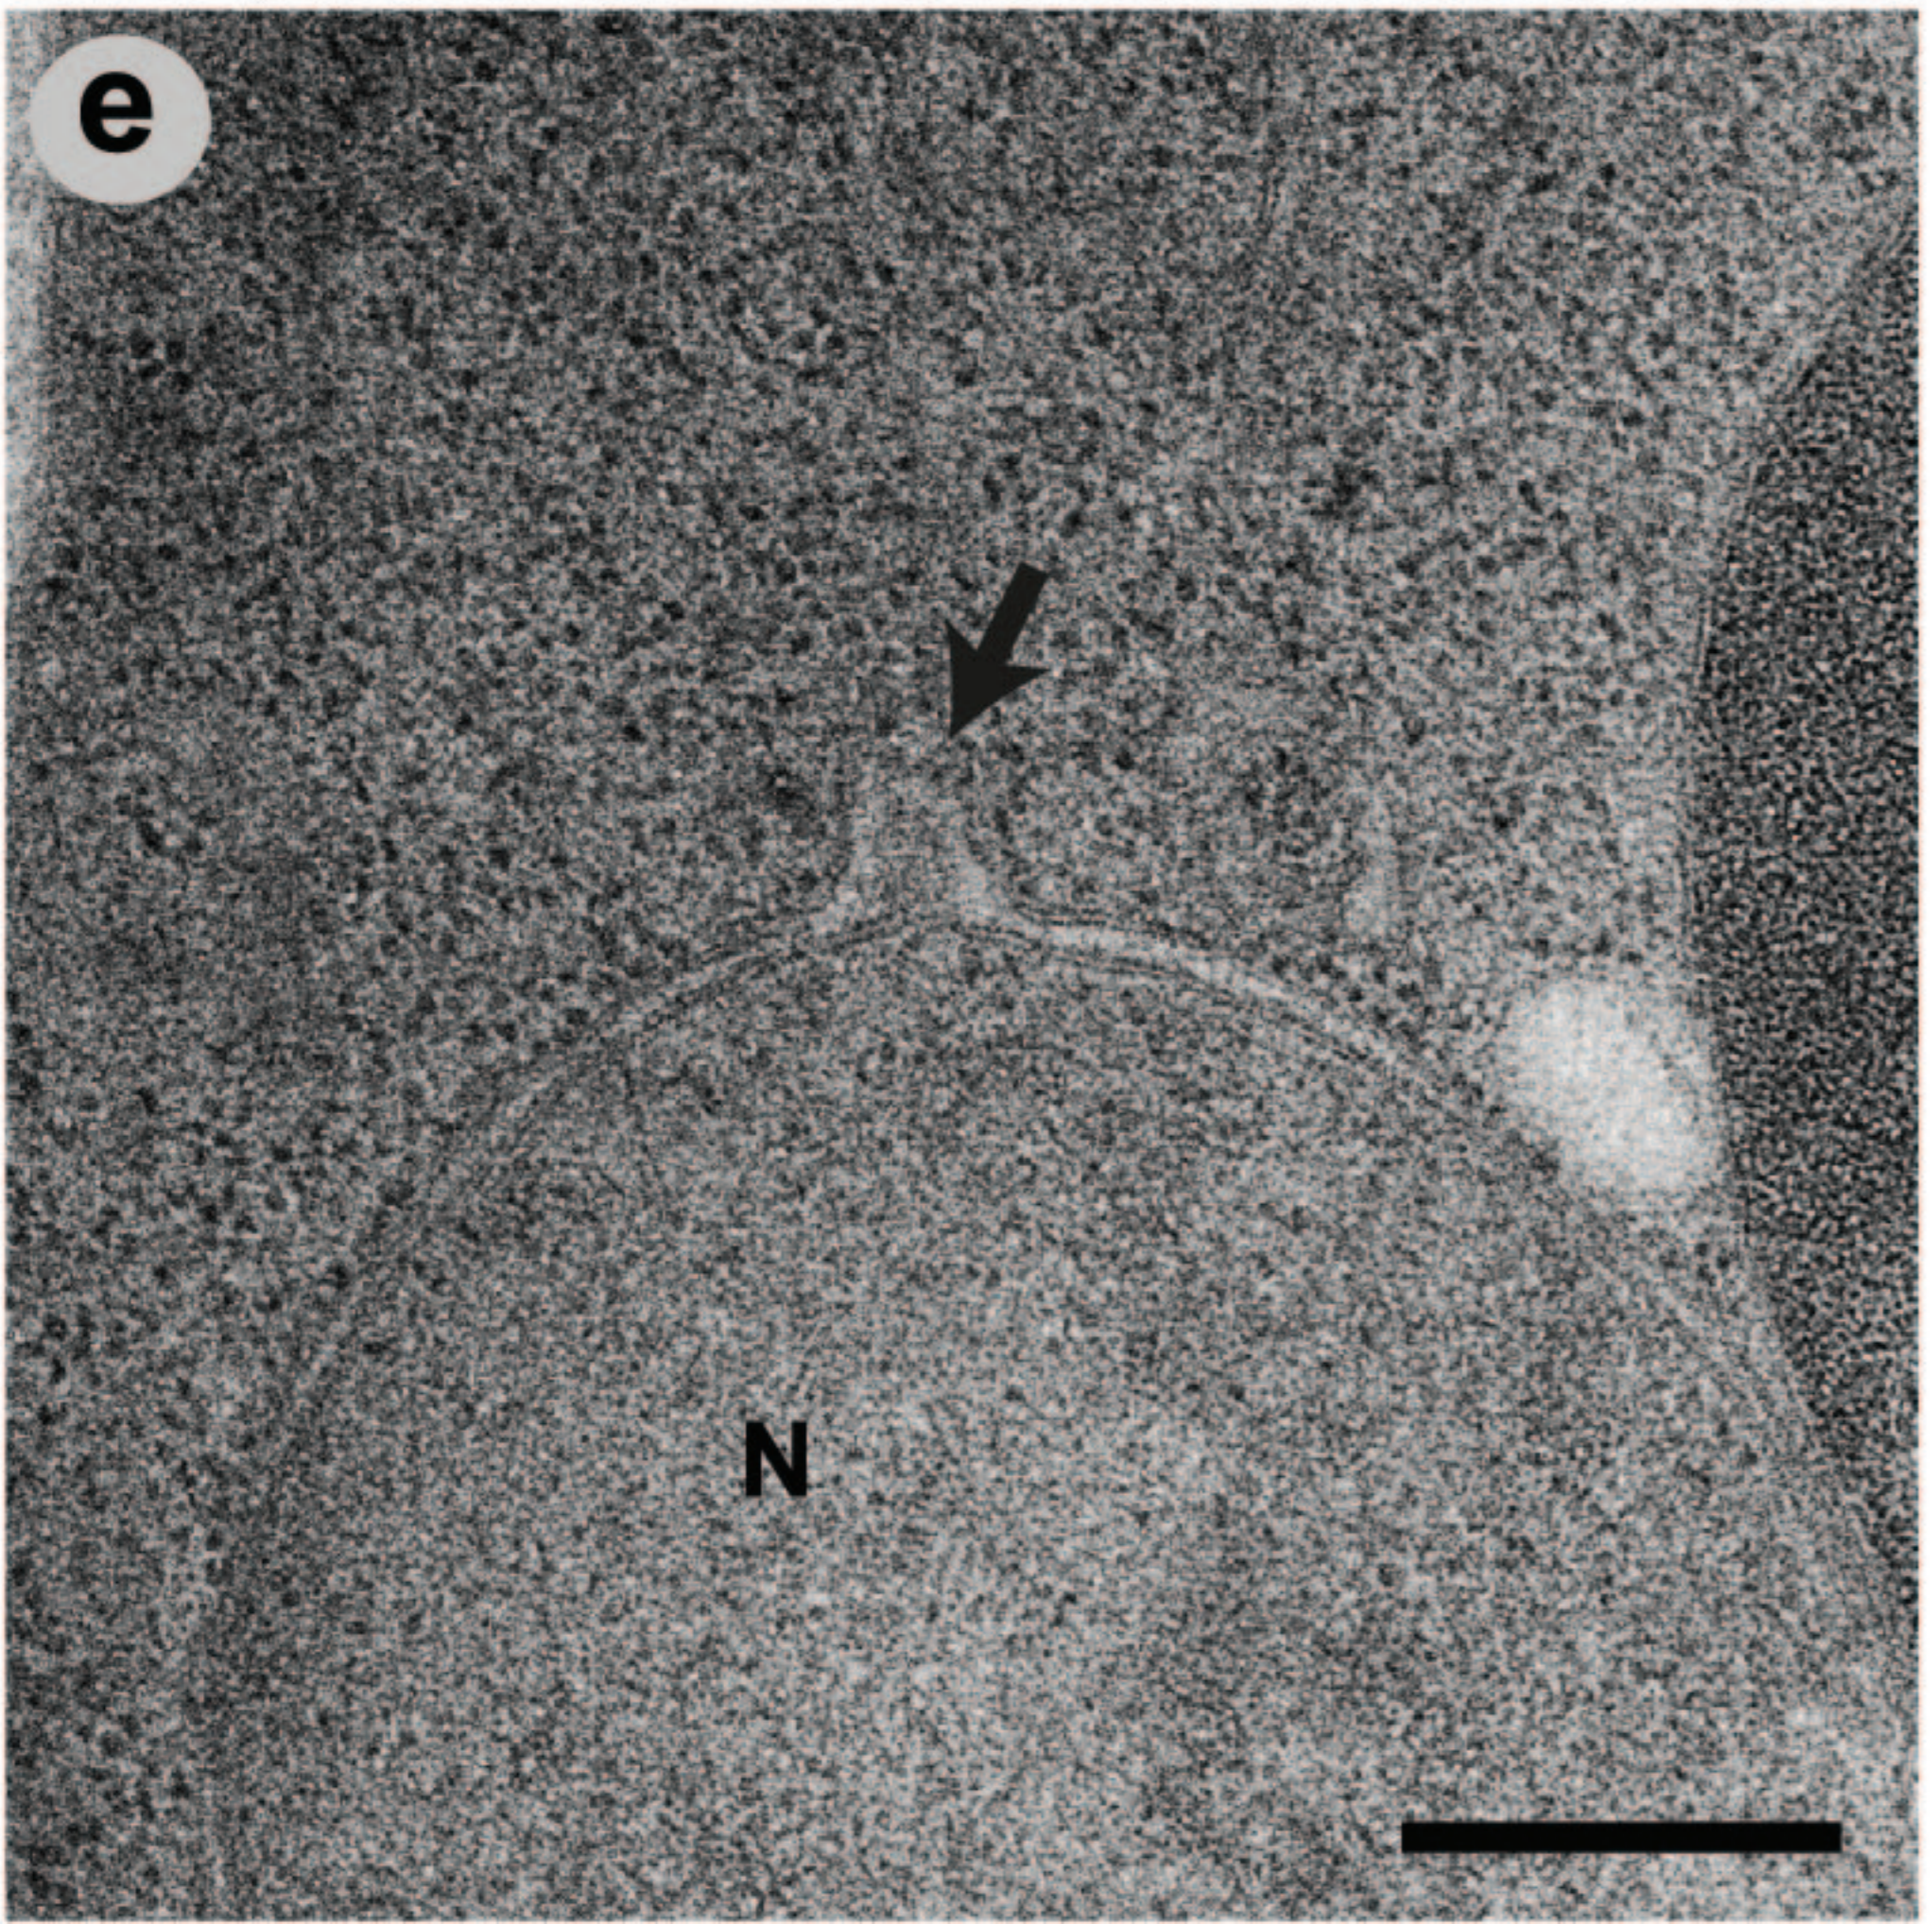

*Schizosaccharomyces pombe*

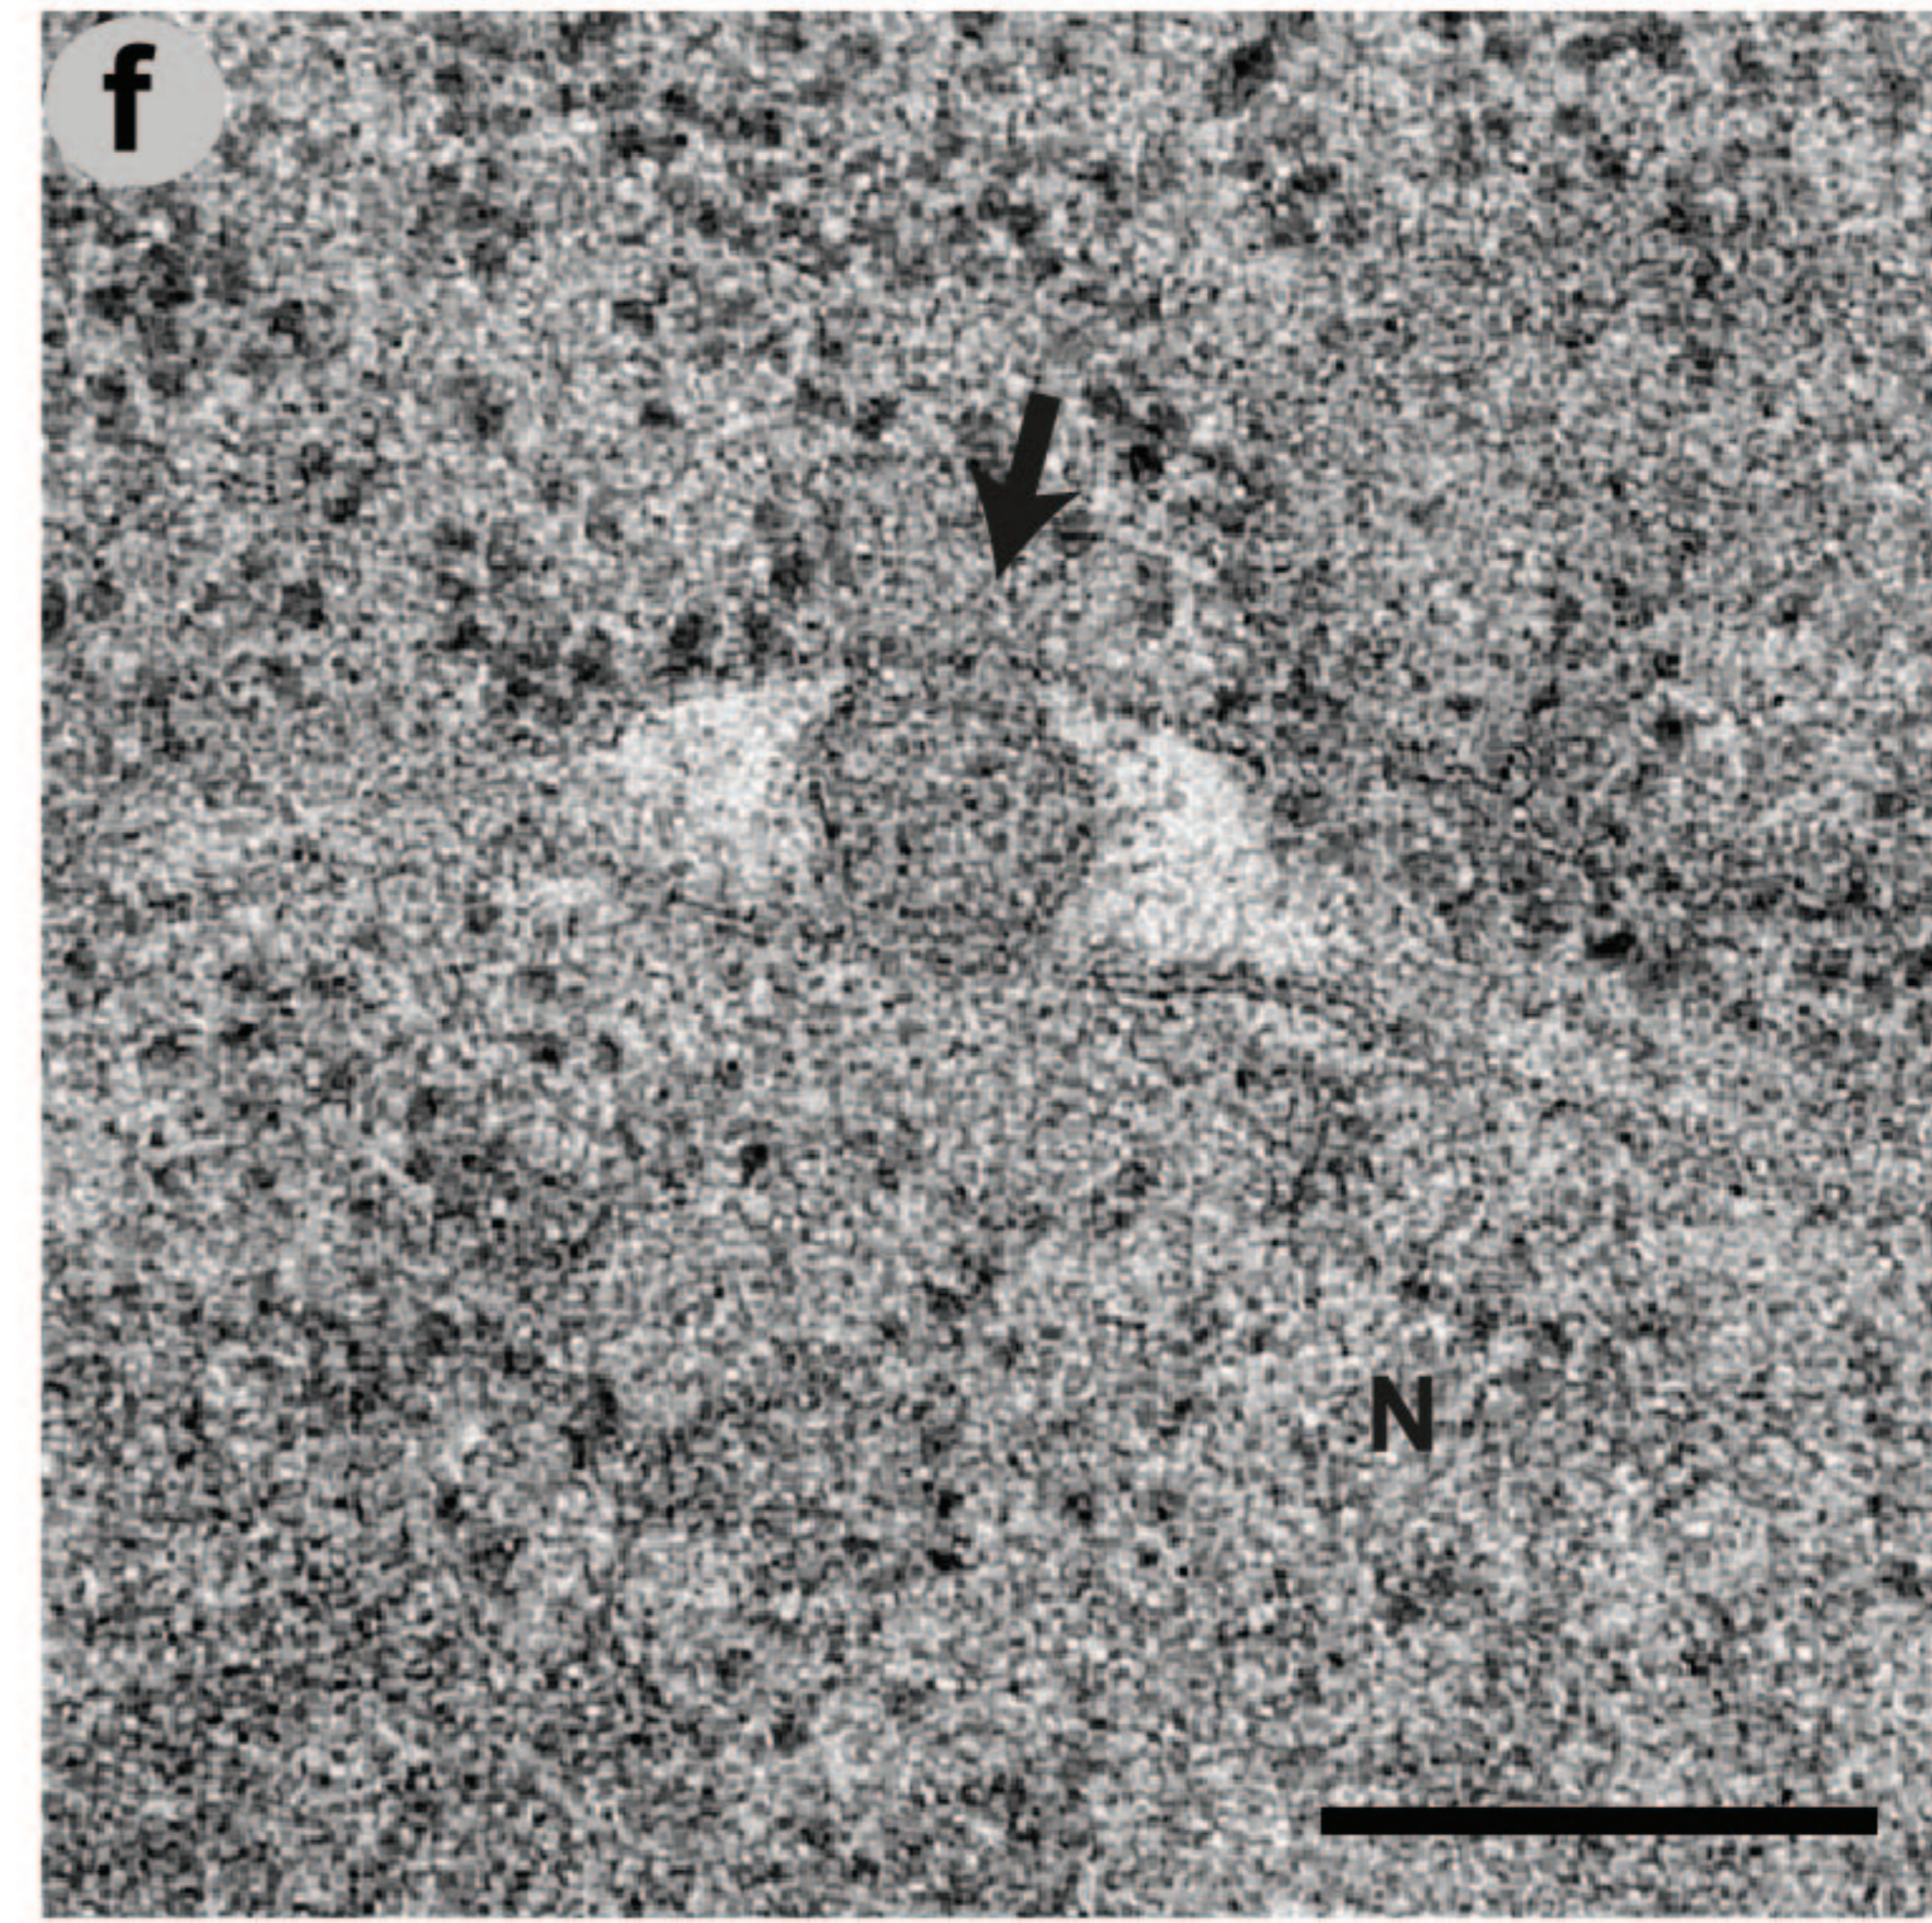

bioRxiv preprint doi: <https://doi.org/10.1101/413153>; this version posted May 7, 2021. The copyright holder for this preprint (which was not certified by peer review) is the author/funder, who has granted bioRxiv a license to display the preprint in perpetuity. It is made available under aCC-BY-NC-ND 4.0 International license.

Figure 6

*Schizosaccharomyces pombe*

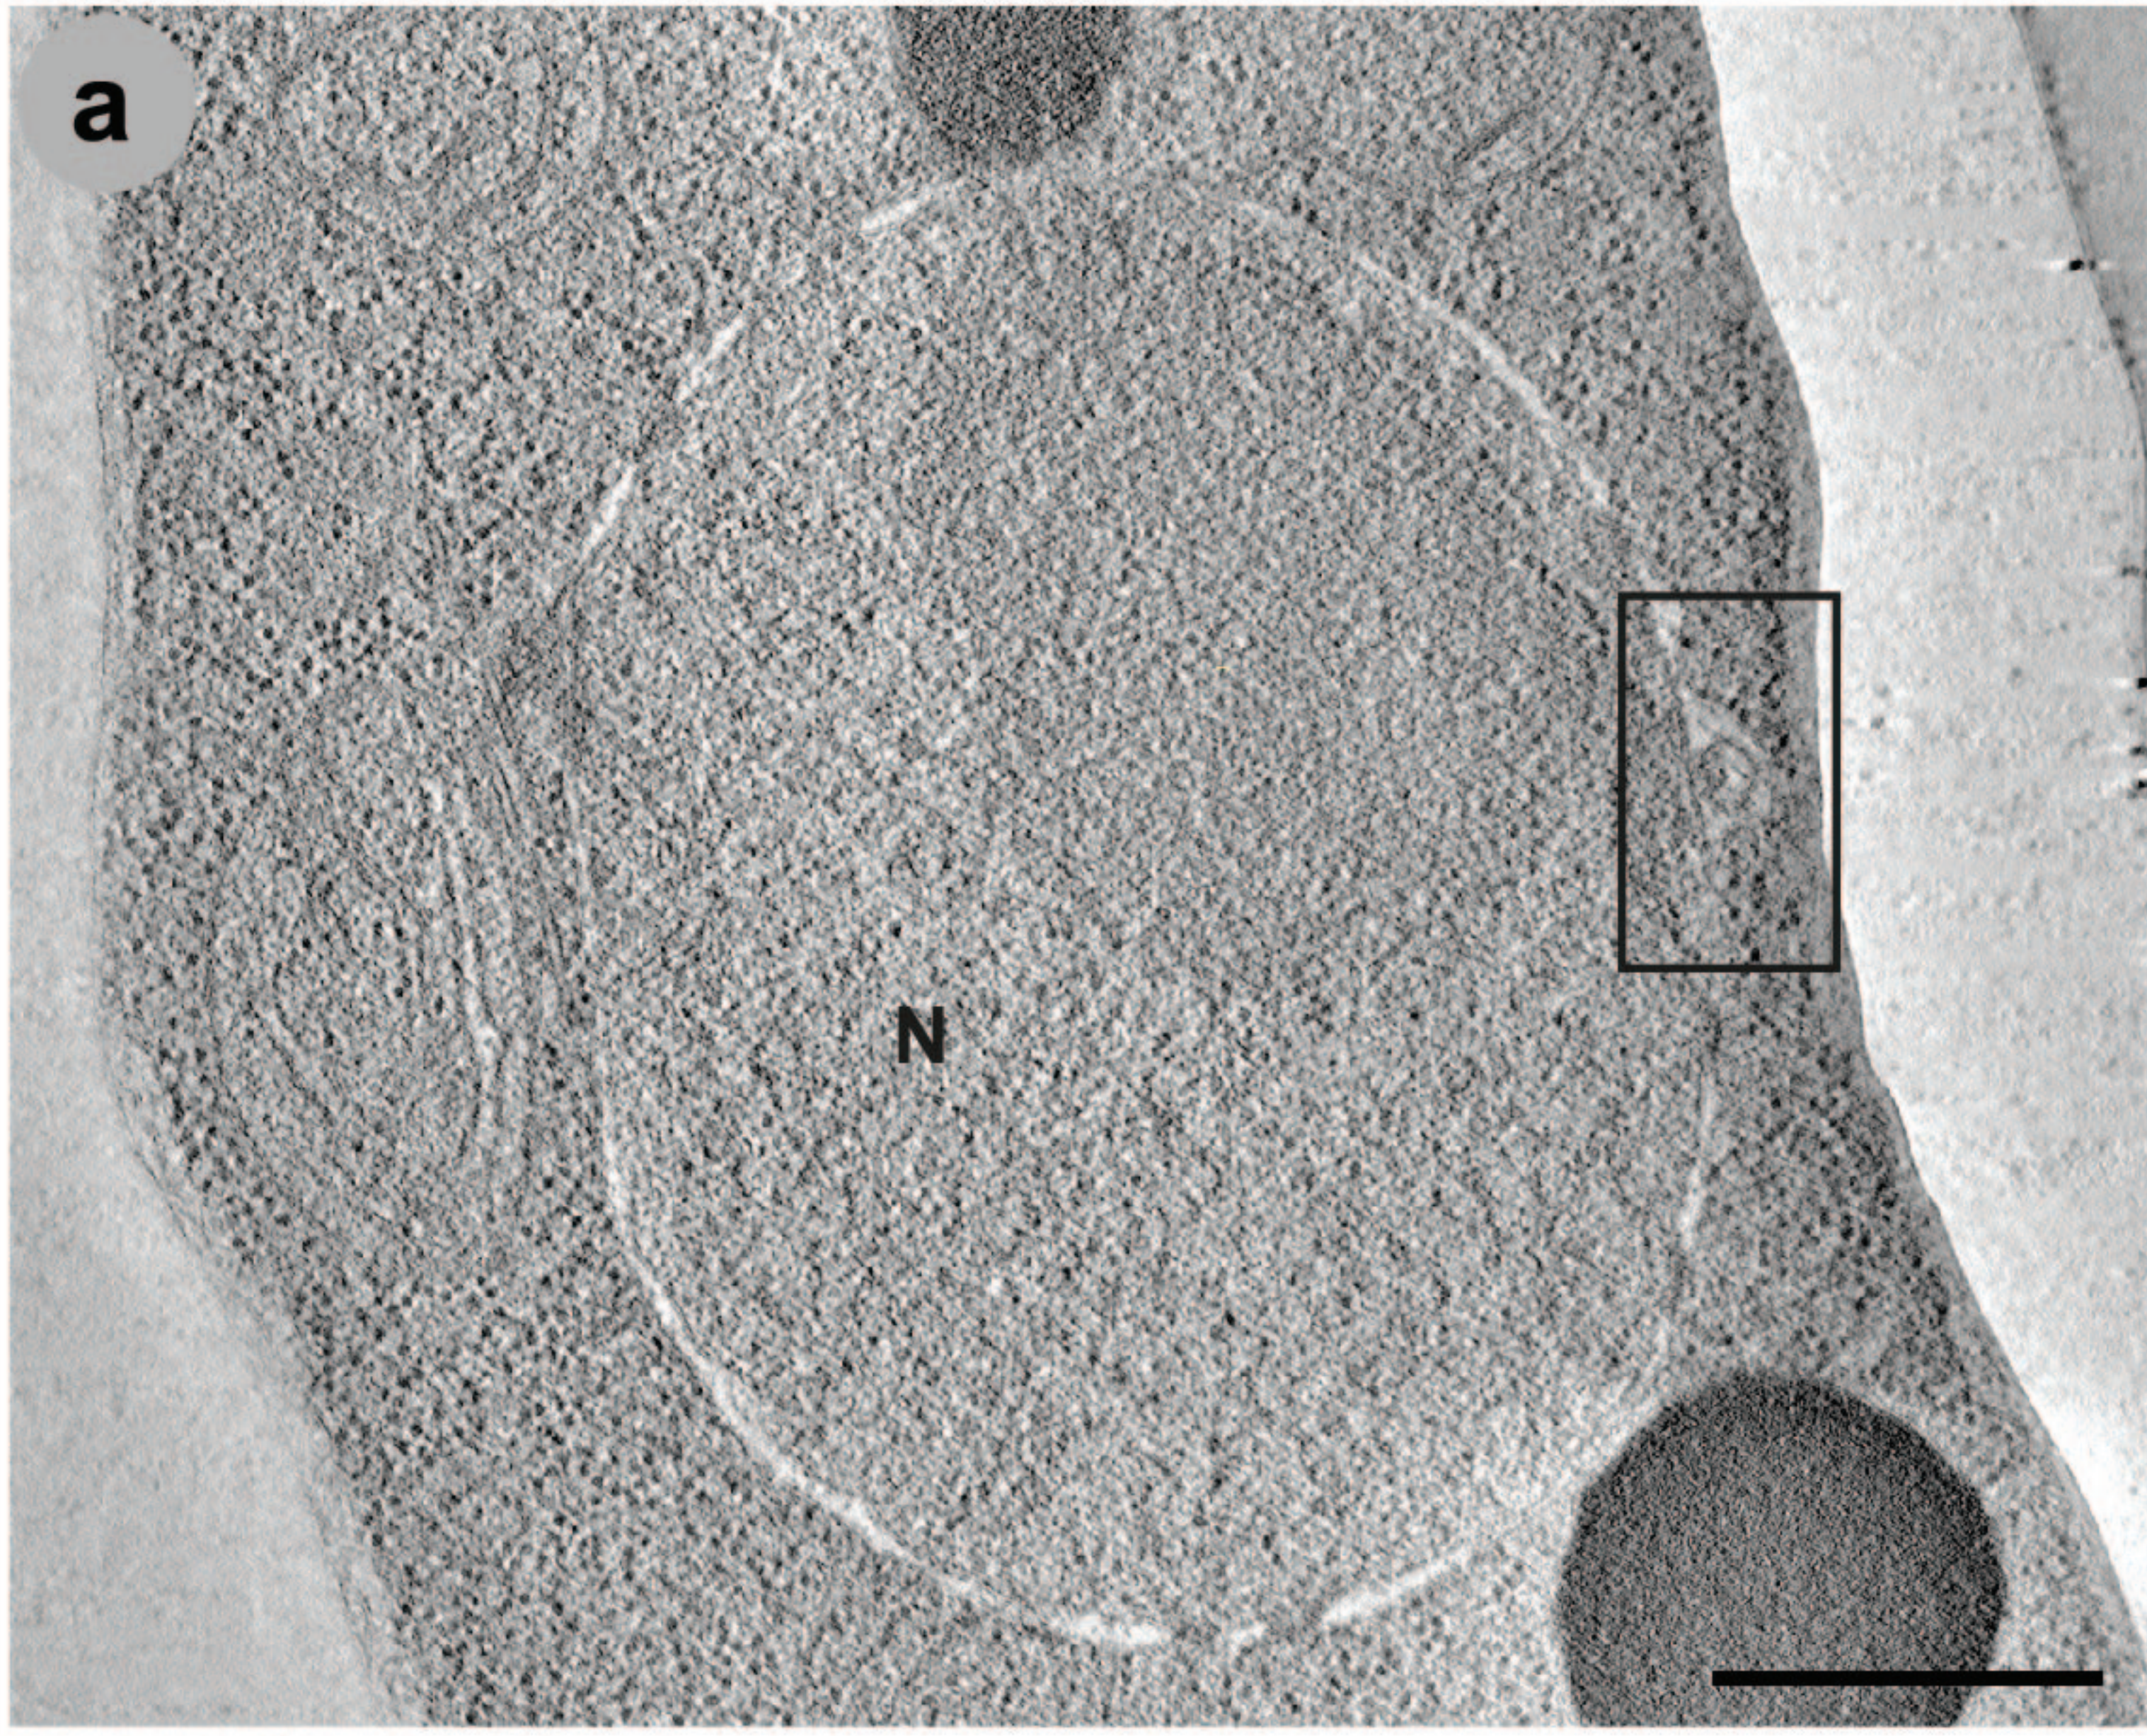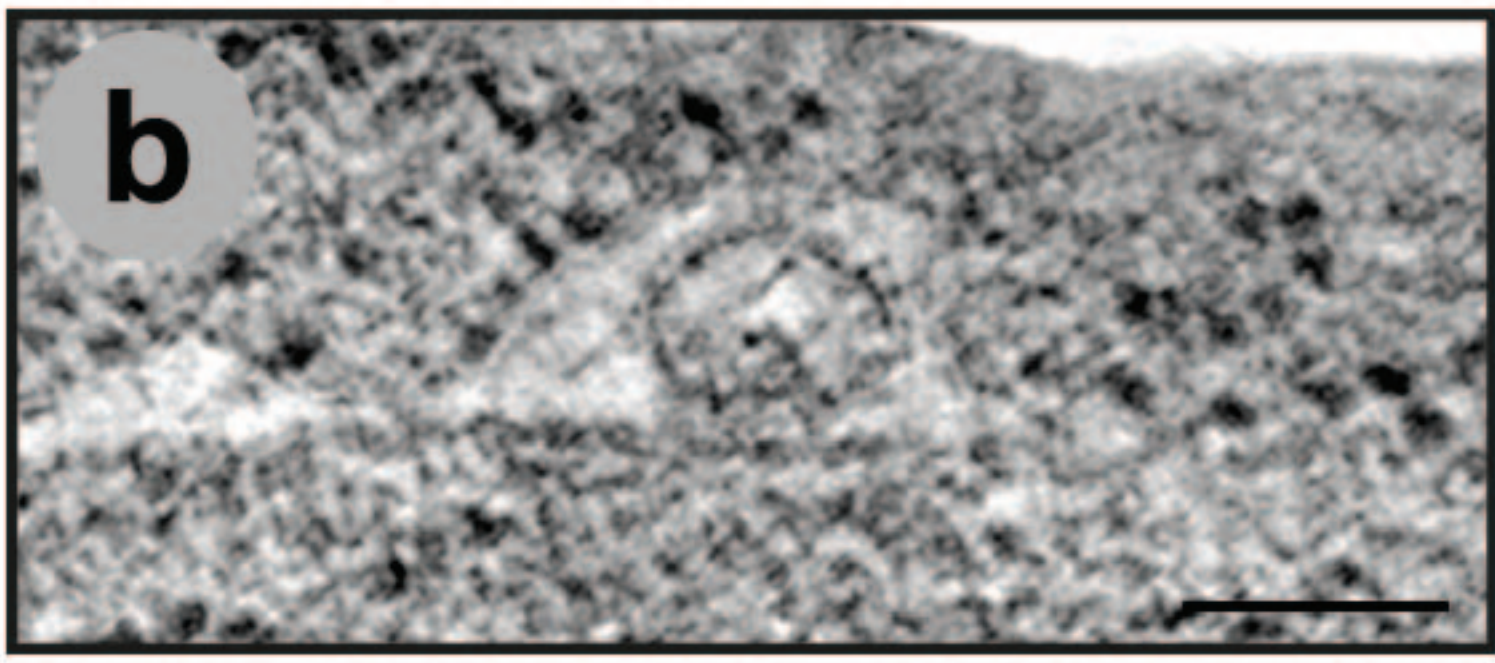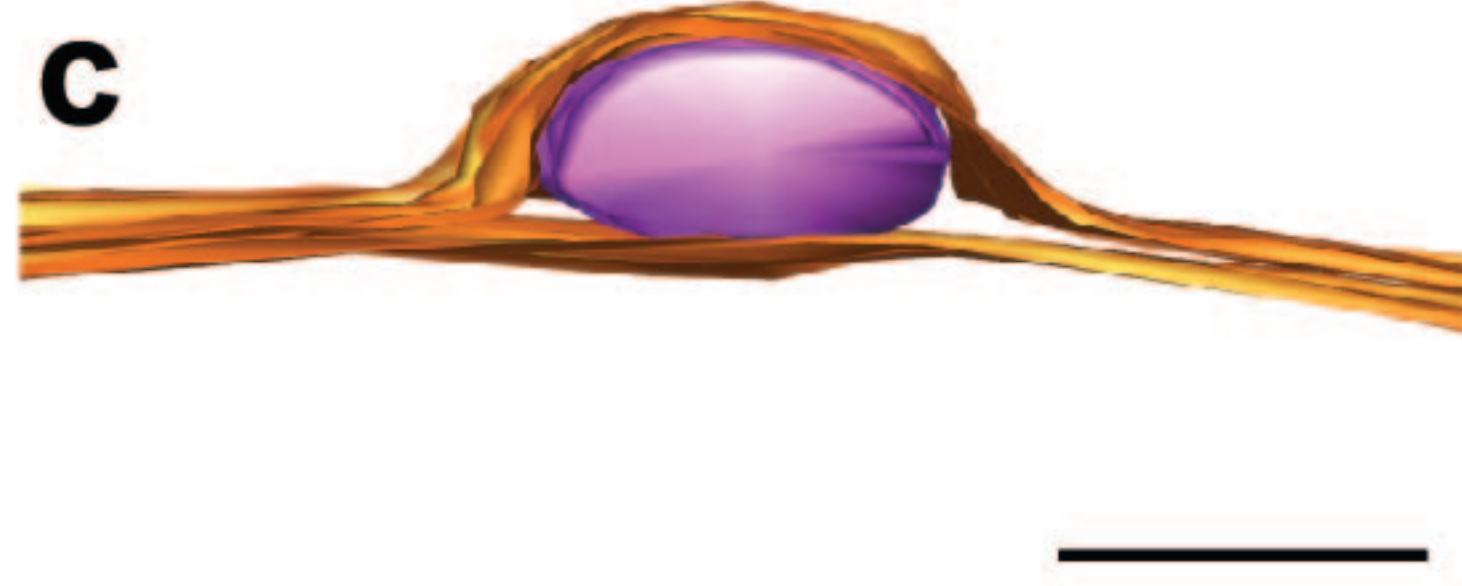

*Trypanosoma brucei*

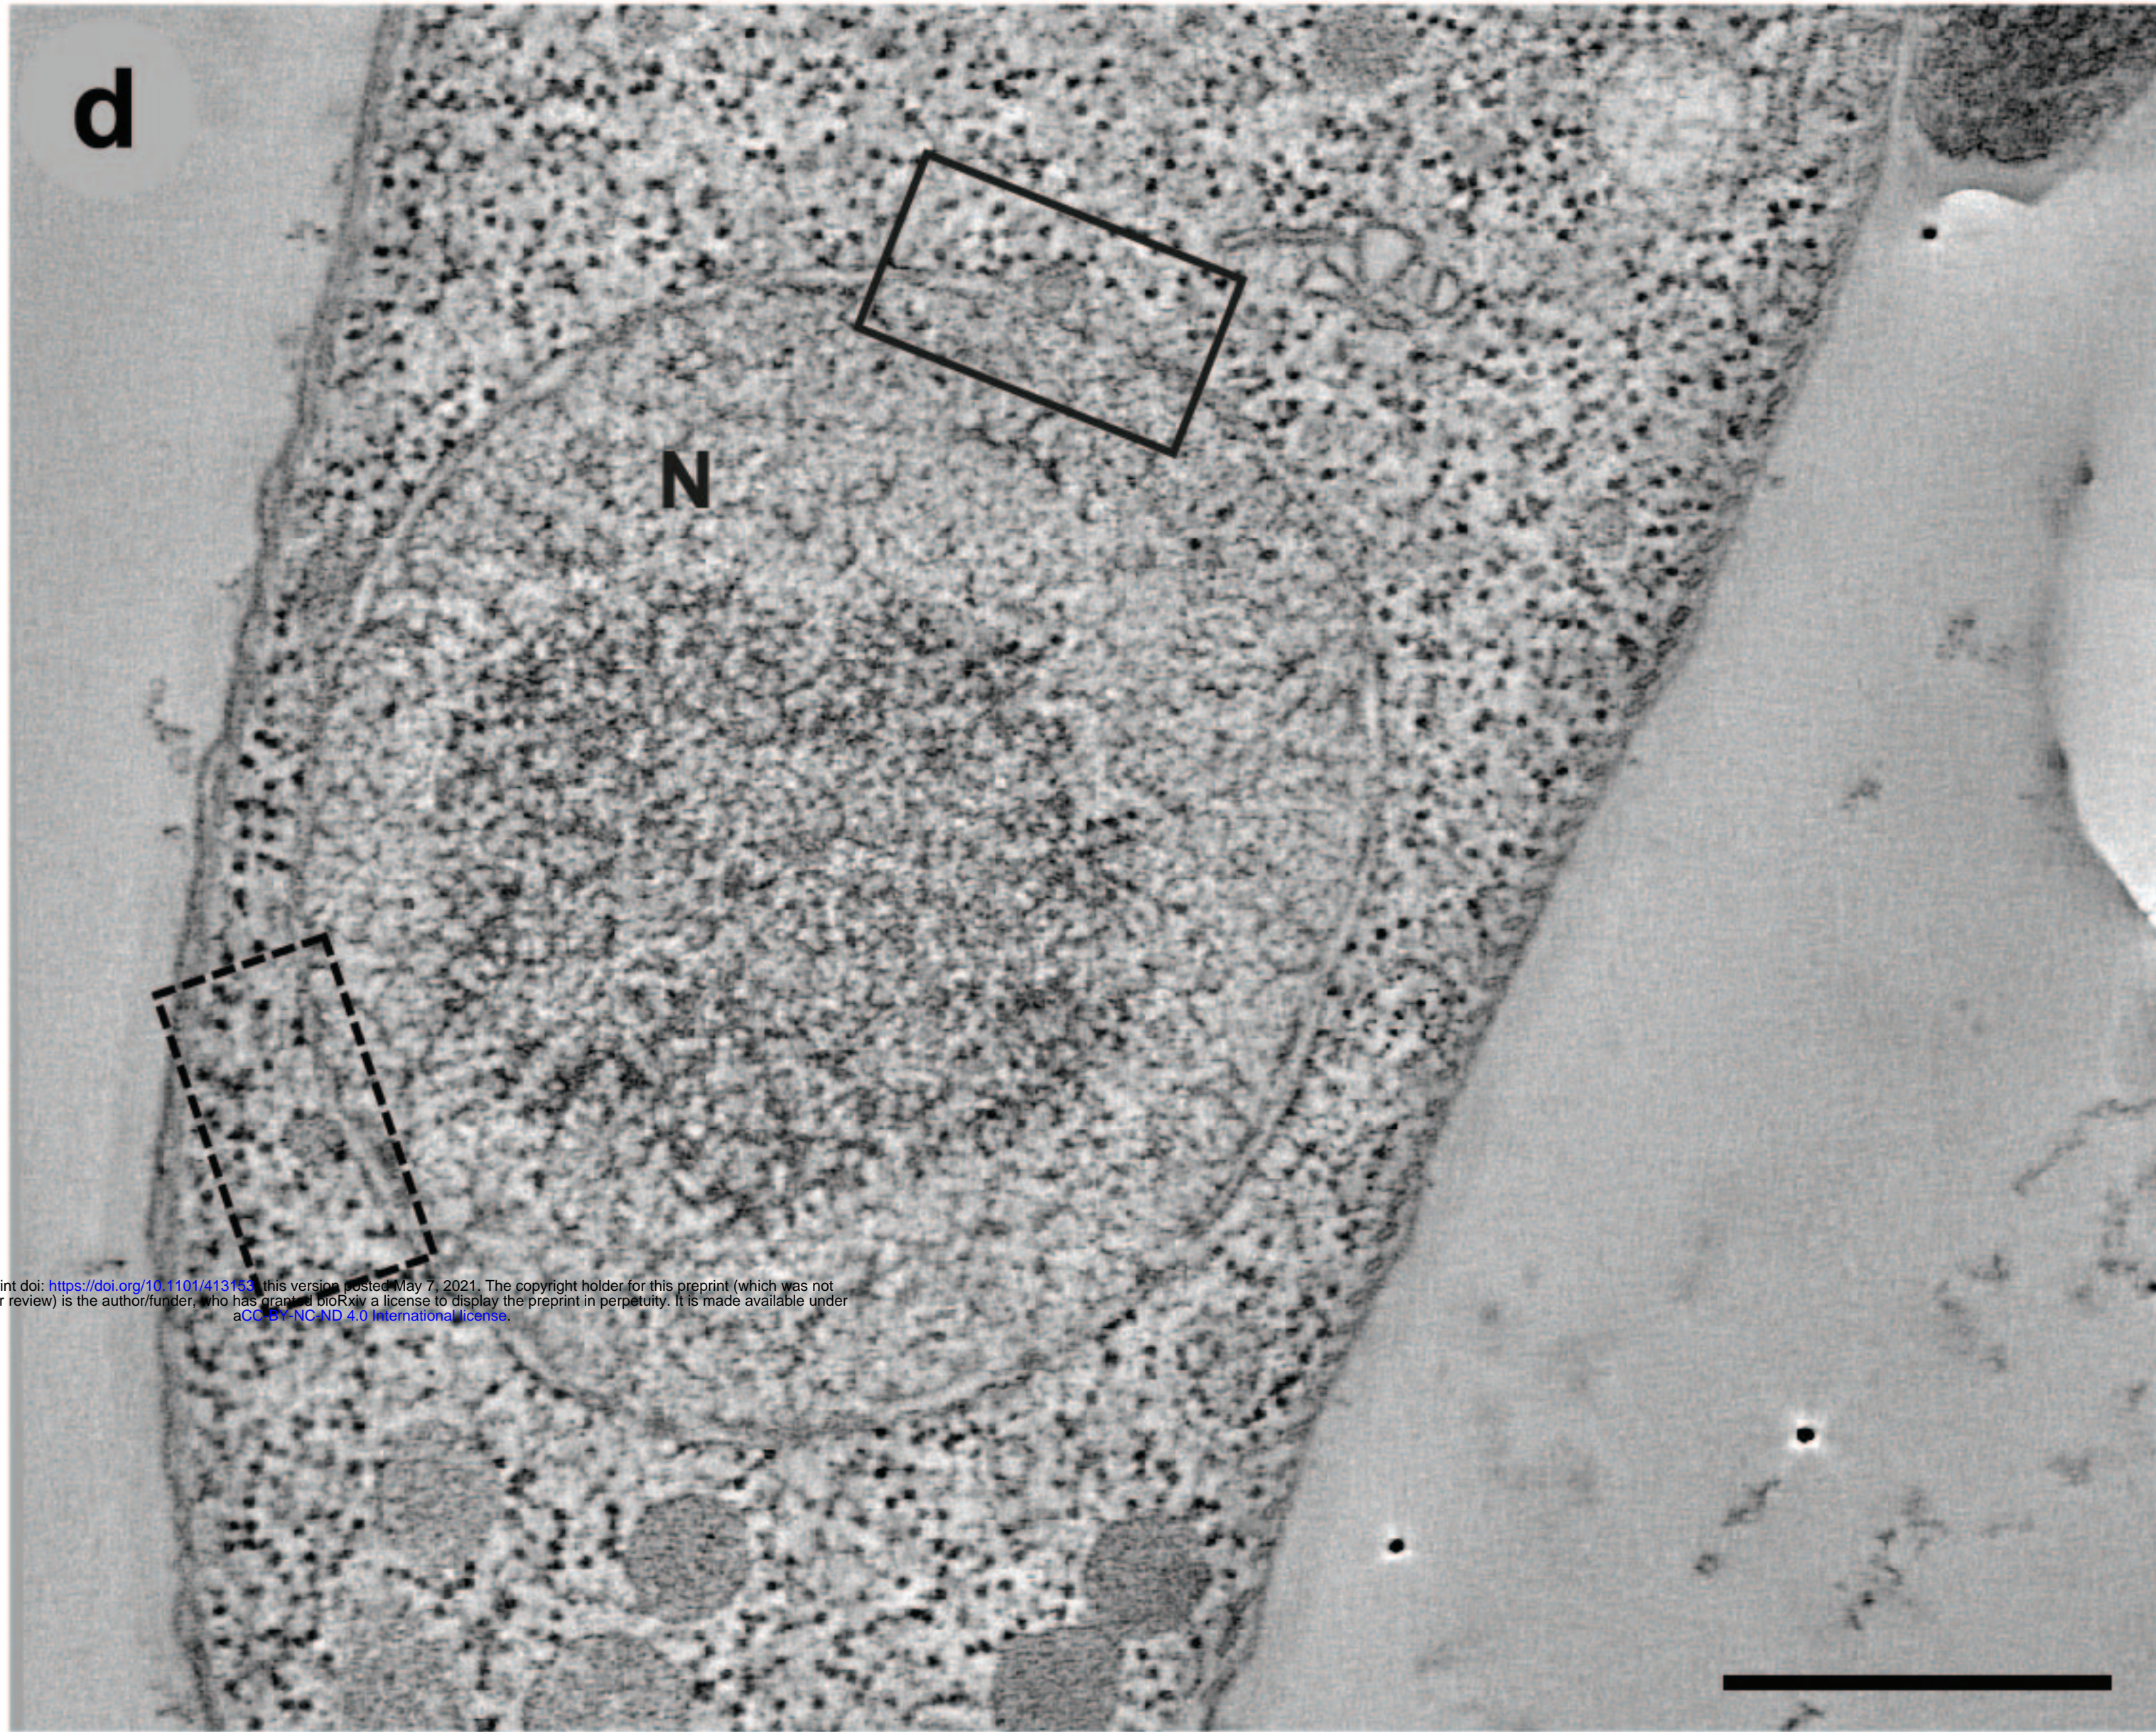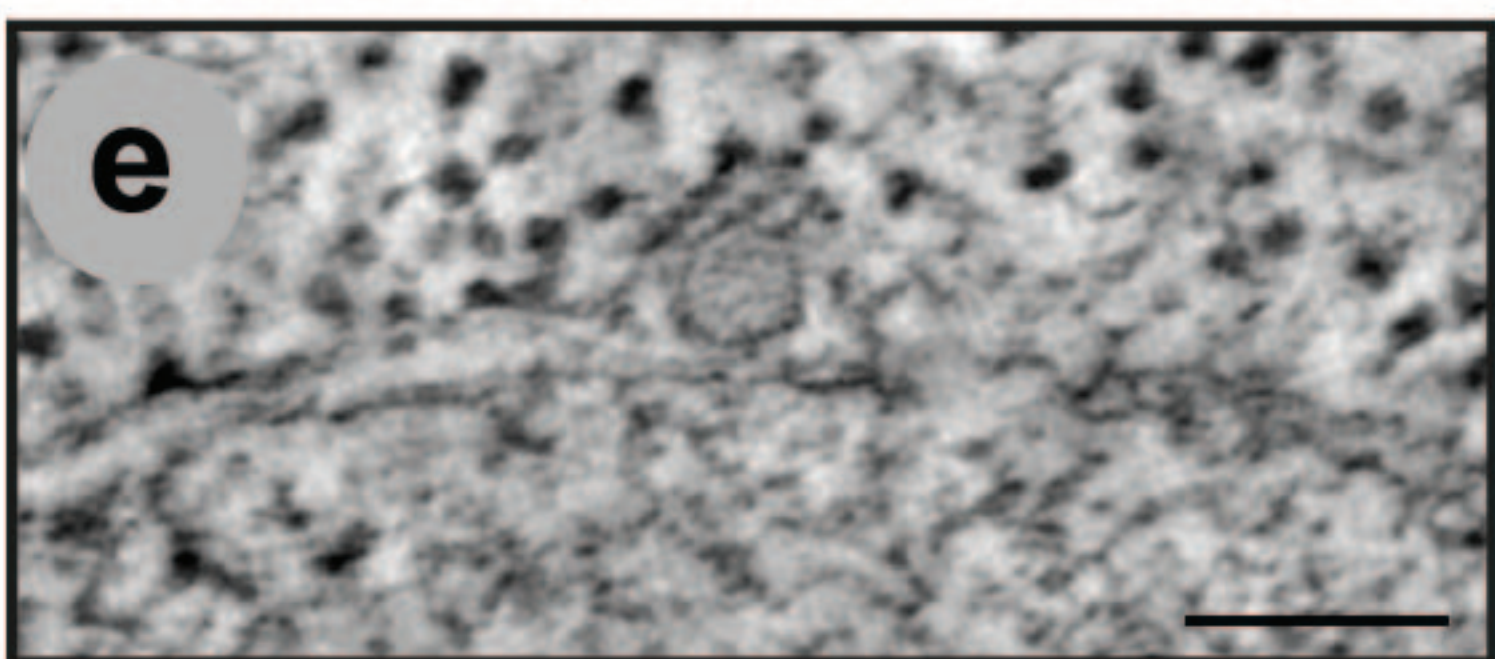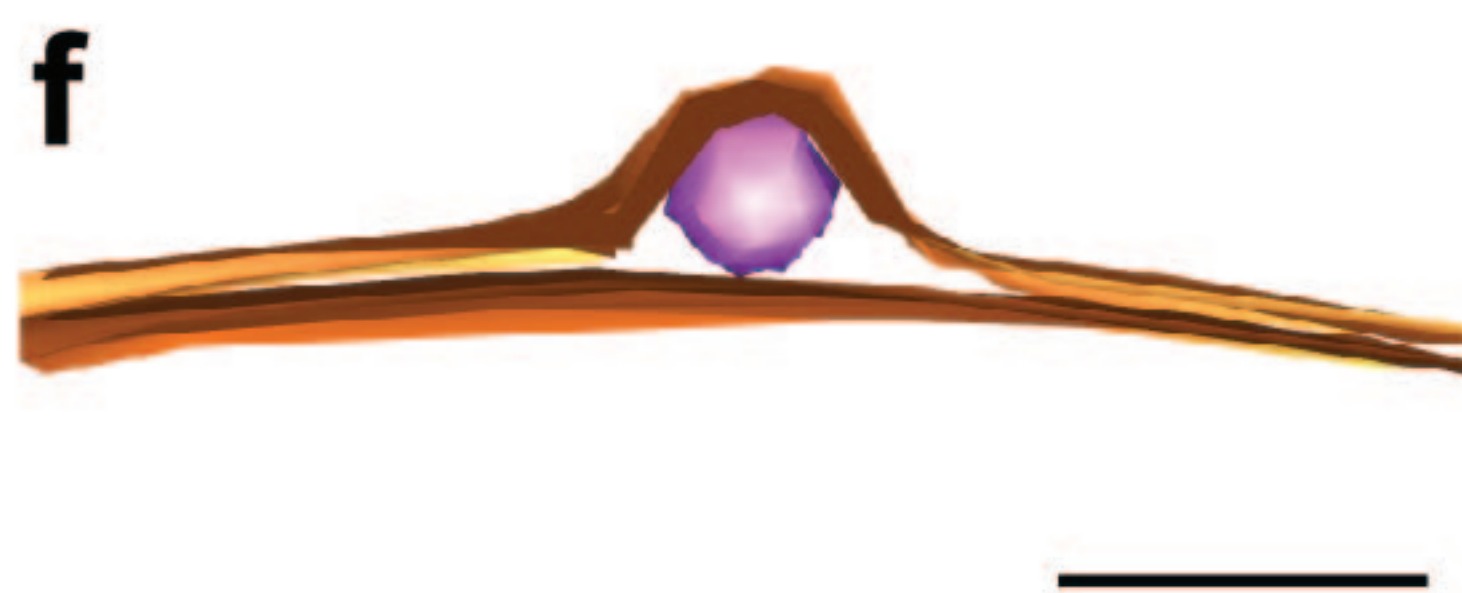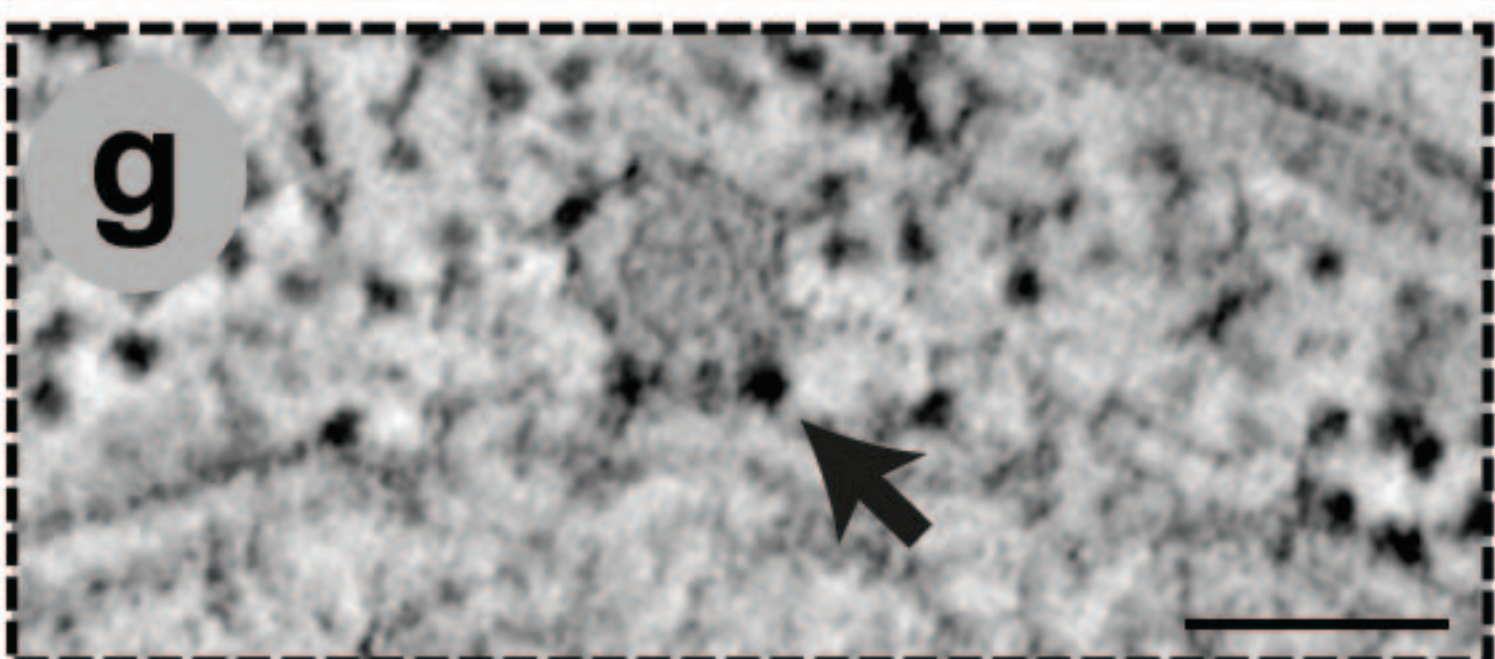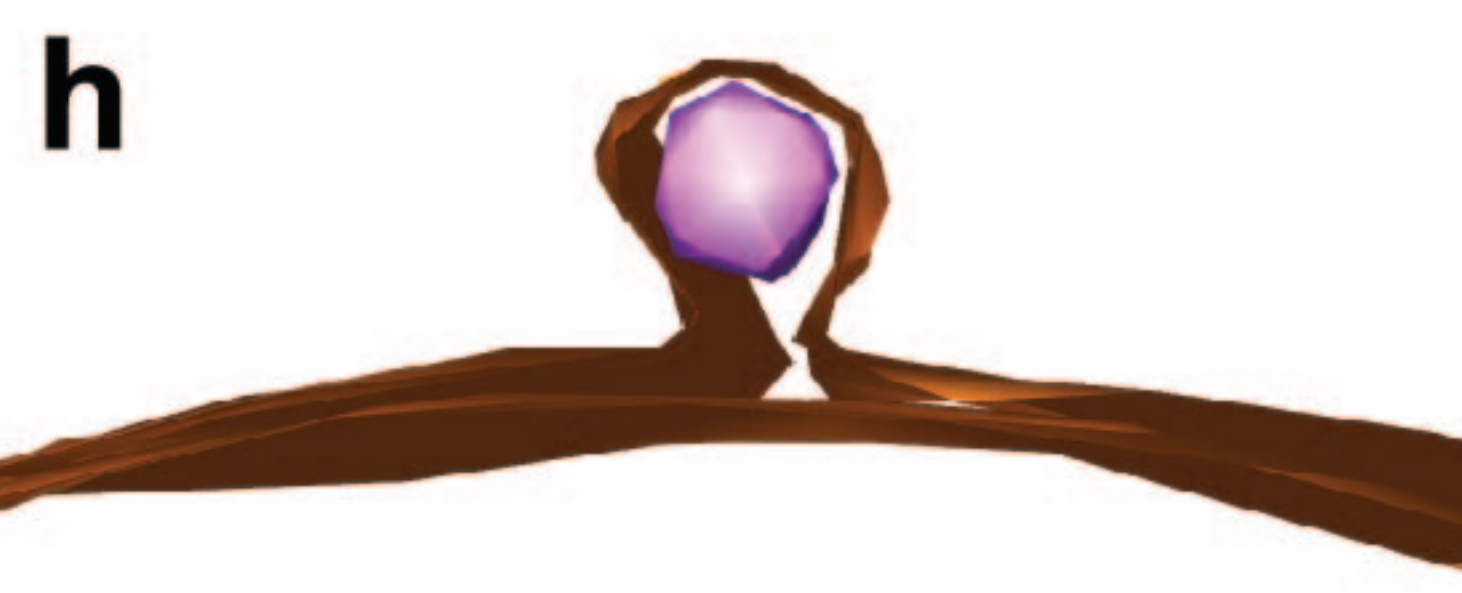

Figure 7

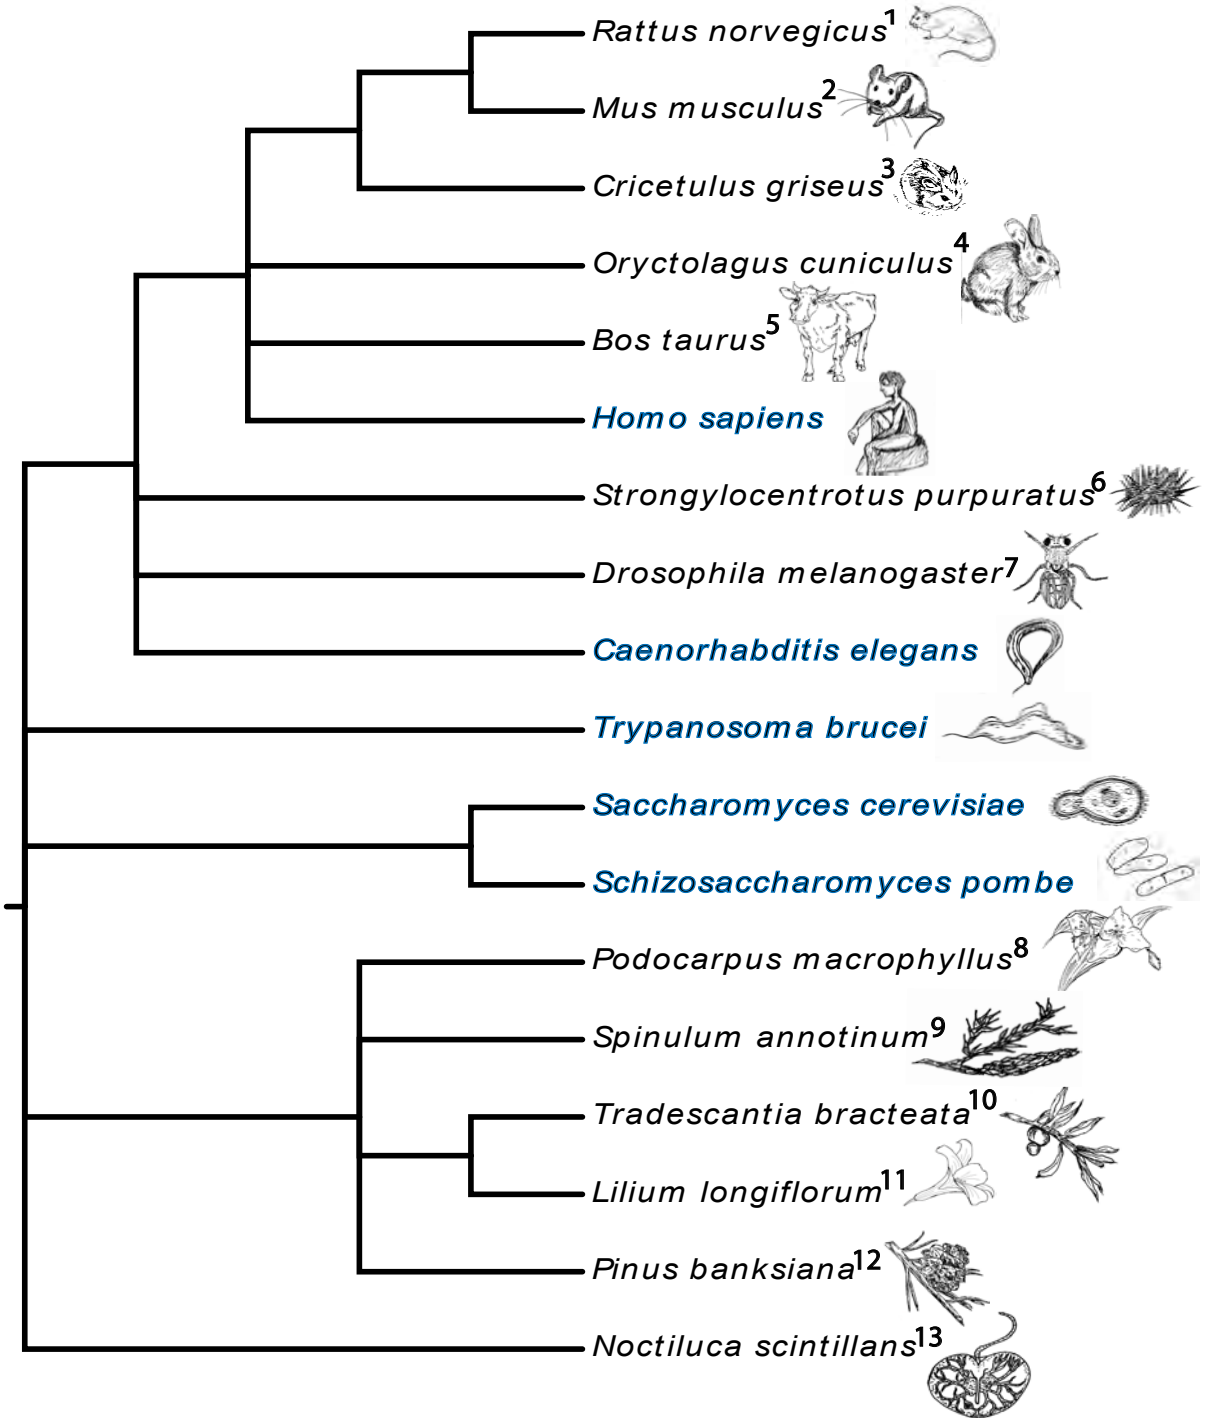

Source: https://www.biorxiv.org/content/biorxiv/early/2021/05/07/413153.full.pdf
